# Supplementary material for: Suitable Days for Plant Growth Disappear under Projected Climate Change: Potential Human and Biotic Vulnerability
Source: PLoS Biol. 2015 Jun 10;13(6):e1002167. doi: 10.1371/journal.pbio.1002167 (PMC4465630; doi:10.1371/journal.pbio.1002167)
Supplement: S1 Data — (XLSX) [file pbio.1002167.s001.xlsx]

## Sheet: Read me
These are the data shown in Figure 1 and Figure S1 in the paper.

## Sheet: PlotA-C (1D)
	VarName	Year	Var	GloFrcNPP	GloFrcNPPByArea
1	tas	2004	-53.7	-2.50769e-06	-4.23421e-06
2	tas	2004	-53.3	-2.50769e-06	-4.23421e-06
3	tas	2004	-52.5	-2.50769e-06	-4.23421e-06
4	tas	2004	-51.9	-2.50769e-06	-4.23421e-06
5	tas	2004	-51.3	-1.92048e-06	-8.46842e-06
6	tas	2004	-50.9	-9.60242e-07	-4.23421e-06
7	tas	2004	-50.6	-5.09508e-06	-8.46842e-06
8	tas	2004	-50.4	-9.60242e-07	-4.23421e-06
9	tas	2004	-50.3	-2.50769e-06	-4.23421e-06
10	tas	2004	-50.1	-9.60242e-07	-4.23421e-06
11	tas	2004	-50	-5.09508e-06	-8.46842e-06
12	tas	2004	-49.7	-3.54764e-06	-8.46842e-06
13	tas	2004	-49.4	-2.50769e-06	-4.23421e-06
14	tas	2004	-49.3	-2.50769e-06	-4.23421e-06
15	tas	2004	-48.9	-2.01067e-06	-8.46842e-06
16	tas	2004	-48.8	-1.05042e-06	-4.23421e-06
17	tas	2004	-48.7	-1.05042e-06	-4.23421e-06
18	tas	2004	-48.5	-2.50769e-06	-4.23421e-06
19	tas	2004	-48.4	-1.05042e-06	-4.23421e-06
20	tas	2004	-48.1	-2.5874e-06	-4.23421e-06
21	tas	2004	-47.9	-8.32957e-06	-1.69368e-05
22	tas	2004	-47.8	-9.60242e-07	-4.23421e-06
23	tas	2004	-47.7	-1.05042e-06	-4.23421e-06
24	tas	2004	-47.5	-2.34588e-06	-4.23421e-06
25	tas	2004	-47.4	-4.6097e-06	-8.46842e-06
26	tas	2004	-47.3	-9.90554e-06	-2.11711e-05
27	tas	2004	-47.1	-3.40408e-06	-8.46842e-06
28	tas	2004	-47	-2.42717e-06	-4.23421e-06
29	tas	2004	-46.9	-2.26382e-06	-4.23421e-06
30	tas	2004	-46.8	-4.93486e-06	-8.46842e-06
31	tas	2004	-46.7	-7.20022e-06	-1.27026e-05
32	tas	2004	-46.6	-3.48614e-06	-8.46842e-06
33	tas	2004	-46.5	-2.42717e-06	-4.23421e-06
34	tas	2004	-46.4	-3.38741e-06	-8.46842e-06
35	tas	2004	-46.3	-1.58327e-06	-4.23421e-06
36	tas	2004	-46.2	-5.40079e-06	-1.27026e-05
37	tas	2004	-46.1	-2.26382e-06	-4.23421e-06
38	tas	2004	-46	-4.77151e-06	-8.46842e-06
39	tas	2004	-45.9	-4.35079e-06	-8.46842e-06
40	tas	2004	-45.8	-4.97068e-06	-1.27026e-05
41	tas	2004	-45.7	-3.94065e-06	-8.46842e-06
42	tas	2004	-45.6	-7.52225e-06	-1.27026e-05
43	tas	2004	-45.5	-5.75393e-06	-1.27026e-05
44	tas	2004	-45.4	-8.62522e-06	-1.69368e-05
45	tas	2004	-45.3	-3.14128e-06	-8.46842e-06
46	tas	2004	-45.2	-1.65398e-05	-3.38737e-05
47	tas	2004	-45.1	-2.18104e-06	-4.23421e-06
48	tas	2004	-44.9	-9.96676e-06	-2.11711e-05
49	tas	2004	-44.8	-5.31597e-06	-1.27026e-05
50	tas	2004	-44.7	-1.10192e-05	-2.96395e-05
51	tas	2004	-44.6	-1.08839e-05	-2.11711e-05
52	tas	2004	-44.5	-5.64897e-06	-1.27026e-05
53	tas	2004	-44.4	-4.88939e-06	-1.27026e-05
54	tas	2004	-44.3	-6.90095e-06	-1.69368e-05
55	tas	2004	-44.2	-1.92249e-05	-3.81079e-05
56	tas	2004	-44.1	-1.36919e-05	-2.54053e-05
57	tas	2004	-44	-1.24632e-05	-2.54053e-05
58	tas	2004	-43.9	-1.22156e-05	-2.11711e-05
59	tas	2004	-43.8	-1.67863e-05	-3.38737e-05
60	tas	2004	-43.7	-2.27506e-05	-4.23421e-05
61	tas	2004	-43.6	-1.2396e-05	-2.96395e-05
62	tas	2004	-43.5	-9.41383e-06	-2.11711e-05
63	tas	2004	-43.4	-1.60693e-05	-2.96395e-05
64	tas	2004	-43.3	-1.89442e-05	-4.23421e-05
65	tas	2004	-43.2	-2.99227e-05	-5.9279e-05
66	tas	2004	-43.1	-2.80258e-05	-5.50448e-05
67	tas	2004	-43	-2.02543e-05	-3.81079e-05
68	tas	2004	-42.9	-1.84744e-05	-4.23421e-05
69	tas	2004	-42.8	-1.88018e-05	-3.81079e-05
70	tas	2004	-42.7	-2.03228e-05	-4.65763e-05
71	tas	2004	-42.6	-2.41665e-05	-5.50448e-05
72	tas	2004	-42.5	-2.75433e-05	-5.50448e-05
73	tas	2004	-42.4	-2.1793e-05	-4.23421e-05
74	tas	2004	-42.3	-3.15874e-05	-6.35132e-05
75	tas	2004	-42.2	-3.94683e-05	-8.045e-05
76	tas	2004	-42.1	-3.31879e-05	-6.35132e-05
77	tas	2004	-42	-3.85882e-05	-8.045e-05
78	tas	2004	-41.9	-2.90279e-05	-6.35132e-05
79	tas	2004	-41.8	-3.79089e-05	-7.19816e-05
80	tas	2004	-41.7	-3.47511e-05	-6.77474e-05
81	tas	2004	-41.6	-3.67496e-05	-7.19816e-05
82	tas	2004	-41.5	-2.83753e-05	-5.50448e-05
83	tas	2004	-41.4	-3.5943e-05	-6.77474e-05
84	tas	2004	-41.3	-3.01283e-05	-6.77474e-05
85	tas	2004	-41.2	-2.58441e-05	-5.50448e-05
86	tas	2004	-41.1	-3.68052e-05	-7.62158e-05
87	tas	2004	-41	-2.71511e-05	-5.50448e-05
88	tas	2004	-40.9	-4.93994e-05	-9.31527e-05
89	tas	2004	-40.8	-4.54456e-05	-9.31527e-05
90	tas	2004	-40.7	-5.61848e-05	-0.00011009
91	tas	2004	-40.6	-4.28793e-05	-8.46842e-05
92	tas	2004	-40.5	-3.74974e-05	-7.19816e-05
93	tas	2004	-40.4	-4.83865e-05	-9.31527e-05
94	tas	2004	-40.3	-5.00141e-05	-0.000105855
95	tas	2004	-40.2	-4.41683e-05	-8.46842e-05
96	tas	2004	-40.1	-4.77353e-05	-9.31527e-05
97	tas	2004	-40	-5.12129e-05	-9.73869e-05
98	tas	2004	-39.9	-3.02078e-05	-5.9279e-05
99	tas	2004	-39.8	-4.00714e-05	-8.045e-05
100	tas	2004	-39.7	-4.90739e-05	-0.000101621
101	tas	2004	-39.6	-5.60756e-05	-0.000114324
102	tas	2004	-39.5	-5.52947e-05	-0.000105855
103	tas	2004	-39.4	-7.37276e-05	-0.000139729
104	tas	2004	-39.3	-5.45291e-05	-0.00011009
105	tas	2004	-39.2	-6.14213e-05	-0.000118558
106	tas	2004	-39.1	-6.67817e-05	-0.000131261
107	tas	2004	-39	-6.94518e-05	-0.000139729
108	tas	2004	-38.9	-6.78014e-05	-0.000131261
109	tas	2004	-38.8	-6.01903e-05	-0.000118558
110	tas	2004	-38.7	-7.87903e-05	-0.000148197
111	tas	2004	-38.6	-8.08318e-05	-0.000156666
112	tas	2004	-38.5	-8.82132e-05	-0.000173603
113	tas	2004	-38.4	-9.00505e-05	-0.000177837
114	tas	2004	-38.3	-8.24002e-05	-0.000169368
115	tas	2004	-38.2	-7.64912e-05	-0.000143963
116	tas	2004	-38.1	-7.62882e-05	-0.000148197
117	tas	2004	-38	-7.86605e-05	-0.000152432
118	tas	2004	-37.9	-9.28427e-05	-0.000177837
119	tas	2004	-37.8	-8.3103e-05	-0.0001609
120	tas	2004	-37.7	-0.000112687	-0.000220179
121	tas	2004	-37.6	-9.58123e-05	-0.000177837
122	tas	2004	-37.5	-0.000112791	-0.000220179
123	tas	2004	-37.4	-0.000107497	-0.000207476
124	tas	2004	-37.3	-0.000108397	-0.000207476
125	tas	2004	-37.2	-9.49443e-05	-0.000186305
126	tas	2004	-37.1	-0.00012906	-0.000249819
127	tas	2004	-37	-0.000113488	-0.000220179
128	tas	2004	-36.9	-0.000113455	-0.000220179
129	tas	2004	-36.8	-0.000150578	-0.000283692
130	tas	2004	-36.7	-0.000147885	-0.000287926
131	tas	2004	-36.6	-0.000119499	-0.000228647
132	tas	2004	-36.5	-0.000133373	-0.000254053
133	tas	2004	-36.4	-0.000126686	-0.000249819
134	tas	2004	-36.3	-0.000148151	-0.000279458
135	tas	2004	-36.2	-0.000150854	-0.000283692
136	tas	2004	-36.1	-0.000143223	-0.000275224
137	tas	2004	-36	-0.000166194	-0.000330269
138	tas	2004	-35.9	-0.000153827	-0.000300629
139	tas	2004	-35.8	-0.000196201	-0.000381079
140	tas	2004	-35.7	-0.000130843	-0.000258287
141	tas	2004	-35.6	-0.000148822	-0.000287926
142	tas	2004	-35.5	-0.000154371	-0.000304863
143	tas	2004	-35.4	-0.000193985	-0.000381079
144	tas	2004	-35.3	-0.000152145	-0.000300629
145	tas	2004	-35.2	-0.000205257	-0.000393782
146	tas	2004	-35.1	-0.000176615	-0.000334503
147	tas	2004	-35	-0.000186598	-0.000347205
148	tas	2004	-34.9	-0.000174666	-0.000347205
149	tas	2004	-34.8	-0.000178415	-0.000347205
150	tas	2004	-34.7	-0.000182666	-0.000342971
151	tas	2004	-34.6	-0.000158908	-0.000296395
152	tas	2004	-34.5	-0.000192555	-0.000368376
153	tas	2004	-34.4	-0.000156156	-0.000304863
154	tas	2004	-34.3	-0.00019698	-0.000372611
155	tas	2004	-34.2	-0.000173221	-0.000347205
156	tas	2004	-34.1	-0.000234824	-0.000444592
157	tas	2004	-34	-0.000199681	-0.000376845
158	tas	2004	-33.9	-0.000196179	-0.000372611
159	tas	2004	-33.8	-0.000207357	-0.000406484
160	tas	2004	-33.7	-0.000190491	-0.00035144
161	tas	2004	-33.6	-0.0002142	-0.000414953
162	tas	2004	-33.5	-0.000239692	-0.000457295
163	tas	2004	-33.4	-0.000210719	-0.00040225
164	tas	2004	-33.3	-0.000240506	-0.000453061
165	tas	2004	-33.2	-0.00028176	-0.000537745
166	tas	2004	-33.1	-0.000267186	-0.000516574
167	tas	2004	-33	-0.00030411	-0.000588555
168	tas	2004	-32.9	-0.000241608	-0.000478466
169	tas	2004	-32.8	-0.000211388	-0.000406484
170	tas	2004	-32.7	-0.000300641	-0.000584321
171	tas	2004	-32.6	-0.000314219	-0.000588555
172	tas	2004	-32.5	-0.00033999	-0.000664771
173	tas	2004	-32.4	-0.00028317	-0.000546213
174	tas	2004	-32.3	-0.000299863	-0.000575853
175	tas	2004	-32.2	-0.000291689	-0.00056315
176	tas	2004	-32.1	-0.000352819	-0.000690177
177	tas	2004	-32	-0.000330893	-0.000626663
178	tas	2004	-31.9	-0.000317966	-0.000609727
179	tas	2004	-31.8	-0.000321724	-0.000605492
180	tas	2004	-31.7	-0.000339758	-0.000626663
181	tas	2004	-31.6	-0.000344701	-0.000635132
182	tas	2004	-31.5	-0.000290943	-0.00056315
183	tas	2004	-31.4	-0.000284695	-0.000537745
184	tas	2004	-31.3	-0.000366456	-0.000694411
185	tas	2004	-31.2	-0.000303145	-0.000567384
186	tas	2004	-31.1	-0.000380145	-0.000719816
187	tas	2004	-31	-0.000393827	-0.000719816
188	tas	2004	-30.9	-0.000369241	-0.00068236
189	tas	2004	-30.8	-0.000412046	-0.000757924
190	tas	2004	-30.7	-0.000365083	-0.000660537
191	tas	2004	-30.6	-0.000374215	-0.000664771
192	tas	2004	-30.5	-0.000441129	-0.000796032
193	tas	2004	-30.4	-0.000381393	-0.000704182
194	tas	2004	-30.3	-0.000385039	-0.000702879
195	tas	2004	-30.2	-0.000351381	-0.000639366
196	tas	2004	-30.1	-0.000336859	-0.00059279
197	tas	2004	-30	-0.00036283	-0.000656303
198	tas	2004	-29.9	-0.00032911	-0.000601258
199	tas	2004	-29.8	-0.000426097	-0.000749456
200	tas	2004	-29.7	-0.000379781	-0.000694411
201	tas	2004	-29.6	-0.000404159	-0.000711348
202	tas	2004	-29.5	-0.000376117	-0.00067324
203	tas	2004	-29.4	-0.000388303	-0.000699296
204	tas	2004	-29.3	-0.00035468	-0.000630898
205	tas	2004	-29.2	-0.000430304	-0.000762158
206	tas	2004	-29.1	-0.000373018	-0.0006436
207	tas	2004	-29	-0.000404321	-0.000711348
208	tas	2004	-28.9	-0.000369139	-0.000656303
209	tas	2004	-28.8	-0.000416835	-0.000740987
210	tas	2004	-28.7	-0.000420484	-0.000740987
211	tas	2004	-28.6	-0.000447569	-0.000787563
212	tas	2004	-28.5	-0.000434248	-0.000749456
213	tas	2004	-28.4	-0.000452626	-0.000796032
214	tas	2004	-28.3	-0.000425661	-0.000724702
215	tas	2004	-28.2	-0.000438774	-0.000745221
216	tas	2004	-28.1	-0.000364461	-0.000652069
217	tas	2004	-28	-0.00039919	-0.000685942
218	tas	2004	-27.9	-0.000377681	-0.000656303
219	tas	2004	-27.8	-0.000430621	-0.000766392
220	tas	2004	-27.7	-0.000442447	-0.000757924
221	tas	2004	-27.6	-0.000448915	-0.000779095
222	tas	2004	-27.5	-0.000410194	-0.000702879
223	tas	2004	-27.4	-0.000449565	-0.000796032
224	tas	2004	-27.3	-0.00045075	-0.000800917
225	tas	2004	-27.2	-0.000422818	-0.000726982
226	tas	2004	-27.1	-0.000444211	-0.00075369
227	tas	2004	-27	-0.000430212	-0.000728284
228	tas	2004	-26.9	-0.000416207	-0.000711348
229	tas	2004	-26.8	-0.000489768	-0.000829906
230	tas	2004	-26.7	-0.000517195	-0.00088495
231	tas	2004	-26.6	-0.000445162	-0.000760855
232	tas	2004	-26.5	-0.000505539	-0.000880716
233	tas	2004	-26.4	-0.000472722	-0.000808083
234	tas	2004	-26.3	-0.000486927	-0.000812969
235	tas	2004	-26.2	-0.00048641	-0.000833488
236	tas	2004	-26.1	-0.000469284	-0.0008045
237	tas	2004	-26	-0.00044788	-0.00074457
238	tas	2004	-25.9	-0.000583853	-0.00100351
239	tas	2004	-25.8	-0.000501987	-0.000825671
240	tas	2004	-25.7	-0.000483618	-0.000805152
241	tas	2004	-25.6	-0.000444345	-0.000753038
242	tas	2004	-25.5	-0.000571122	-0.000918824
243	tas	2004	-25.4	-0.000468728	-0.000783329
244	tas	2004	-25.3	-0.000602521	-0.00104585
245	tas	2004	-25.2	-0.000607744	-0.00100286
246	tas	2004	-25.1	-0.000564439	-0.000935109
247	tas	2004	-25	-0.000568893	-0.000973869
248	tas	2004	-24.9	-0.000609632	-0.00102891
249	tas	2004	-24.8	-0.000616229	-0.00103315
250	tas	2004	-24.7	-0.000630049	-0.00104162
251	tas	2004	-24.6	-0.00062133	-0.00101263
252	tas	2004	-24.5	-0.000598879	-0.000981686
253	tas	2004	-24.4	-0.000573987	-0.000935761
254	tas	2004	-24.3	-0.000611828	-0.00100709
255	tas	2004	-24.2	-0.00057962	-0.000969635
256	tas	2004	-24.1	-0.000599215	-0.000999274
257	tas	2004	-24	-0.000619892	-0.00102826
258	tas	2004	-23.9	-0.000629714	-0.00103184
259	tas	2004	-23.8	-0.000641991	-0.00104878
260	tas	2004	-23.7	-0.000511821	-0.000833488
261	tas	2004	-23.6	-0.000566513	-0.000930224
262	tas	2004	-23.5	-0.000581504	-0.000956932
263	tas	2004	-23.4	-0.000645821	-0.00105855
264	tas	2004	-23.3	-0.00070473	-0.00115171
265	tas	2004	-23.2	-0.000660974	-0.00108819
266	tas	2004	-23.1	-0.000641664	-0.00103966
267	tas	2004	-23	-0.0006228	-0.00100839
268	tas	2004	-22.9	-0.0006334	-0.00105855
269	tas	2004	-22.8	-0.000636951	-0.00104585
270	tas	2004	-22.7	-0.000698004	-0.00110871
271	tas	2004	-22.6	-0.000718114	-0.00112272
272	tas	2004	-22.5	-0.00071821	-0.00114682
273	tas	2004	-22.4	-0.000637345	-0.00101979
274	tas	2004	-22.3	-0.000685856	-0.00107907
275	tas	2004	-22.2	-0.000704044	-0.00116864
276	tas	2004	-22.1	-0.000746352	-0.00118558
277	tas	2004	-22	-0.000601909	-0.000967029
278	tas	2004	-21.9	-0.000642394	-0.00101491
279	tas	2004	-21.8	-0.000743231	-0.00115952
280	tas	2004	-21.7	-0.000780133	-0.00123932
281	tas	2004	-21.6	-0.000796467	-0.00125496
282	tas	2004	-21.5	-0.000780149	-0.00123378
283	tas	2004	-21.4	-0.000696663	-0.00113412
284	tas	2004	-21.3	-0.00071345	-0.00113151
285	tas	2004	-21.2	-0.000675843	-0.00108754
286	tas	2004	-21.1	-0.000783004	-0.00124909
287	tas	2004	-21	-0.000800334	-0.00124551
288	tas	2004	-20.9	-0.000760537	-0.00121685
289	tas	2004	-20.8	-0.000807604	-0.00126375
290	tas	2004	-20.7	-0.000790762	-0.00123444
291	tas	2004	-20.6	-0.000819008	-0.00126896
292	tas	2004	-20.5	-0.00074952	-0.0011618
293	tas	2004	-20.4	-0.000894698	-0.00137905
294	tas	2004	-20.3	-0.000842387	-0.00133899
295	tas	2004	-20.2	-0.000816177	-0.00127613
296	tas	2004	-20.1	-0.000820402	-0.00129339
297	tas	2004	-20	-0.000782064	-0.00123802
298	tas	2004	-19.9	-0.000915945	-0.00140022
299	tas	2004	-19.8	-0.00087681	-0.00130316
300	tas	2004	-19.7	-0.000816721	-0.00126636
301	tas	2004	-19.6	-0.000834041	-0.00127841
302	tas	2004	-19.5	-0.00078959	-0.00120838
303	tas	2004	-19.4	-0.000878117	-0.00135234
304	tas	2004	-19.3	-0.000907426	-0.00141162
305	tas	2004	-19.2	-0.00096093	-0.0014709
306	tas	2004	-19.1	-0.000991669	-0.00152204
307	tas	2004	-19	-0.000835187	-0.0013087
308	tas	2004	-18.9	-0.000946471	-0.00143963
309	tas	2004	-18.8	-0.000892795	-0.00136635
310	tas	2004	-18.7	-0.000922906	-0.0014266
311	tas	2004	-18.6	-0.000904244	-0.00140055
312	tas	2004	-18.5	-0.000920067	-0.00140641
313	tas	2004	-18.4	-0.000919655	-0.00141846
314	tas	2004	-18.3	-0.000966846	-0.00145461
315	tas	2004	-18.2	-0.000986498	-0.00153865
316	tas	2004	-18.1	-0.000986476	-0.00151845
317	tas	2004	-18	-0.000956372	-0.00149207
318	tas	2004	-17.9	-0.000871941	-0.00134225
319	tas	2004	-17.8	-0.00096258	-0.00147937
320	tas	2004	-17.7	-0.000986176	-0.00151487
321	tas	2004	-17.6	-0.000942063	-0.00141618
322	tas	2004	-17.5	-0.000848211	-0.00133801
323	tas	2004	-17.4	-0.000997556	-0.00154386
324	tas	2004	-17.3	-0.00106972	-0.00153181
325	tas	2004	-17.2	-0.00104798	-0.00156112
326	tas	2004	-17.1	-0.00106545	-0.00162203
327	tas	2004	-17	-0.00109773	-0.00162854
328	tas	2004	-16.9	-0.00106471	-0.00159923
329	tas	2004	-16.8	-0.00111788	-0.0016445
330	tas	2004	-16.7	-0.000975967	-0.00146797
331	tas	2004	-16.6	-0.00111689	-0.00166242
332	tas	2004	-16.5	-0.00107672	-0.00165167
333	tas	2004	-16.4	-0.00109911	-0.00168489
334	tas	2004	-16.3	-0.00104996	-0.00160867
335	tas	2004	-16.2	-0.00106259	-0.00163082
336	tas	2004	-16.1	-0.00113633	-0.00171486
337	tas	2004	-16	-0.00107312	-0.00163897
338	tas	2004	-15.9	-0.000942754	-0.00142823
339	tas	2004	-15.8	-0.00100837	-0.00153441
340	tas	2004	-15.7	-0.00109131	-0.00160216
341	tas	2004	-15.6	-0.00107437	-0.00163799
342	tas	2004	-15.5	-0.00115441	-0.00172658
343	tas	2004	-15.4	-0.00114702	-0.00178879
344	tas	2004	-15.3	-0.00104324	-0.00159076
345	tas	2004	-15.2	-0.0011586	-0.00172756
346	tas	2004	-15.1	-0.00102054	-0.00161975
347	tas	2004	-15	-0.000950702	-0.00153278
348	tas	2004	-14.9	-0.00104681	-0.001609
349	tas	2004	-14.8	-0.00100389	-0.00158132
350	tas	2004	-14.7	-0.00105478	-0.00161193
351	tas	2004	-14.6	-0.00121593	-0.00191842
352	tas	2004	-14.5	-0.00103233	-0.00160965
353	tas	2004	-14.4	-0.00106391	-0.00160509
354	tas	2004	-14.3	-0.00102252	-0.00158685
355	tas	2004	-14.2	-0.00114308	-0.00178977
356	tas	2004	-14.1	-0.00103097	-0.00158783
357	tas	2004	-14	-0.00120146	-0.00181583
358	tas	2004	-13.9	-0.00102723	-0.00163831
359	tas	2004	-13.8	-0.00112885	-0.00175622
360	tas	2004	-13.7	-0.000958032	-0.00162659
361	tas	2004	-13.6	-0.00113295	-0.00174222
362	tas	2004	-13.5	-0.00109168	-0.00173375
363	tas	2004	-13.4	-0.00110185	-0.00170574
364	tas	2004	-13.3	-0.00110922	-0.0017458
365	tas	2004	-13.2	-0.0010747	-0.00169857
366	tas	2004	-13.1	-0.000979101	-0.00159695
367	tas	2004	-13	-0.000900719	-0.00151813
368	tas	2004	-12.9	-0.00102824	-0.00165199
369	tas	2004	-12.8	-0.000860995	-0.00155591
370	tas	2004	-12.7	-0.00100533	-0.00170639
371	tas	2004	-12.6	-0.000928802	-0.00153474
372	tas	2004	-12.5	-0.000885499	-0.0015735
373	tas	2004	-12.4	-0.00113767	-0.00185491
374	tas	2004	-12.3	-0.00112636	-0.00179303
375	tas	2004	-12.2	-0.00097071	-0.00161877
376	tas	2004	-12.1	-0.0010079	-0.00167545
377	tas	2004	-12	-0.000438435	-0.00110187
378	tas	2004	-11.9	-0.00107109	-0.00175687
379	tas	2004	-11.8	-0.000837947	-0.00135755
380	tas	2004	-11.7	-0.0010304	-0.00164581
381	tas	2004	-11.6	-0.00107827	-0.00176111
382	tas	2004	-11.5	-0.000951964	-0.0017129
383	tas	2004	-11.4	-0.000743936	-0.00145266
384	tas	2004	-11.3	-0.00103544	-0.00170997
385	tas	2004	-11.2	-0.00106425	-0.00168391
386	tas	2004	-11.1	-0.000720426	-0.00139892
387	tas	2004	-11	-0.000875567	-0.00148132
388	tas	2004	-10.9	-0.00101582	-0.00173244
389	tas	2004	-10.8	-0.00087036	-0.00150445
390	tas	2004	-10.7	-0.000651466	-0.00132531
391	tas	2004	-10.6	-0.000949584	-0.00165427
392	tas	2004	-10.5	-0.000702344	-0.00139794
393	tas	2004	-10.4	-0.000432507	-0.00112011
394	tas	2004	-10.3	-0.000447423	-0.00115333
395	tas	2004	-10.2	-6.3506e-05	-0.000727959
396	tas	2004	-10.1	-0.000400577	-0.000995691
397	tas	2004	-10	-0.000806456	-0.00146276
398	tas	2004	-9.9	-0.000548534	-0.00113053
399	tas	2004	-9.8	-0.000781896	-0.00146276
400	tas	2004	-9.7	-0.000377334	-0.00101556
401	tas	2004	-9.6	-0.00020657	-0.000830557
402	tas	2004	-9.5	0.000334711	-0.000303886
403	tas	2004	-9.4	-0.000756201	-0.00136342
404	tas	2004	-9.3	3.99286e-06	-0.000530905
405	tas	2004	-9.2	1.6177e-05	-0.000620801
406	tas	2004	-9.1	3.68004e-05	-0.000539374
407	tas	2004	-9	8.47693e-05	-0.000402902
408	tas	2004	-8.9	-0.000401469	-0.000934132
409	tas	2004	-8.8	-0.000317531	-0.000749456
410	tas	2004	-8.7	-0.000390764	-0.000846842
411	tas	2004	-8.6	-3.92624e-05	-0.000577807
412	tas	2004	-8.5	7.28051e-05	-0.000545236
413	tas	2004	-8.4	-0.000240271	-0.000723399
414	tas	2004	-8.3	0.000339209	-5.11363e-05
415	tas	2004	-8.2	0.000247674	-0.000128004
416	tas	2004	-8.1	7.72614e-05	-0.000362514
417	tas	2004	-8	0.000277622	-0.000164157
418	tas	2004	-7.9	0.000730306	0.000311377
419	tas	2004	-7.8	0.00112564	0.00079766
420	tas	2004	-7.7	0.000916313	0.000623732
421	tas	2004	-7.6	0.000356841	4.29935e-05
422	tas	2004	-7.5	0.00129999	0.000816226
423	tas	2004	-7.4	0.00167376	0.00136537
424	tas	2004	-7.3	0.00114686	0.000819157
425	tas	2004	-7.2	0.00182399	0.00139045
426	tas	2004	-7.1	0.00184692	0.00146829
427	tas	2004	-7	0.00108713	0.00081818
428	tas	2004	-6.9	0.00134958	0.00101817
429	tas	2004	-6.8	0.00120386	0.000805152
430	tas	2004	-6.7	0.00283519	0.00247636
431	tas	2004	-6.6	0.000838452	0.000371308
432	tas	2004	-6.5	0.00113253	0.000897001
433	tas	2004	-6.4	0.00168225	0.00156992
434	tas	2004	-6.3	0.00263596	0.00239233
435	tas	2004	-6.2	0.00396108	0.00362416
436	tas	2004	-6.1	0.00237573	0.00242457
437	tas	2004	-6	0.00304197	0.0030014
438	tas	2004	-5.9	0.00224333	0.00222036
439	tas	2004	-5.8	0.00376724	0.00388636
440	tas	2004	-5.7	0.00485862	0.00484296
441	tas	2004	-5.6	0.00290899	0.00264443
442	tas	2004	-5.5	0.00299234	0.0028405
443	tas	2004	-5.4	0.00564637	0.00598164
444	tas	2004	-5.3	0.00422068	0.00439641
445	tas	2004	-5.2	0.00449259	0.00455862
446	tas	2004	-5.1	0.00360655	0.00387463
447	tas	2004	-5	0.00324188	0.00321246
448	tas	2004	-4.9	0.00378565	0.00450064
449	tas	2004	-4.8	0.00411386	0.00452996
450	tas	2004	-4.7	0.00593222	0.0065842
451	tas	2004	-4.6	0.00641525	0.00771897
452	tas	2004	-4.5	0.00577491	0.0061471
453	tas	2004	-4.4	0.0070118	0.00785805
454	tas	2004	-4.3	0.00644573	0.0072988
455	tas	2004	-4.2	0.00608297	0.00689265
456	tas	2004	-4.1	0.00640168	0.00686561
457	tas	2004	-4	0.00738671	0.00839188
458	tas	2004	-3.9	0.0058386	0.00635848
459	tas	2004	-3.8	0.00744078	0.00827398
460	tas	2004	-3.7	0.00718634	0.00828831
461	tas	2004	-3.6	0.00782305	0.00900421
462	tas	2004	-3.5	0.00784339	0.00877492
463	tas	2004	-3.4	0.00993537	0.0121522
464	tas	2004	-3.3	0.00863247	0.0102018
465	tas	2004	-3.2	0.00965297	0.0114441
466	tas	2004	-3.1	0.0110822	0.0132042
467	tas	2004	-3	0.0124308	0.0146253
468	tas	2004	-2.9	0.00915583	0.0111057
469	tas	2004	-2.8	0.010493	0.0125232
470	tas	2004	-2.7	0.0119748	0.0140022
471	tas	2004	-2.6	0.010233	0.012717
472	tas	2004	-2.5	0.0125746	0.0150148
473	tas	2004	-2.4	0.0133786	0.0160122
474	tas	2004	-2.3	0.013259	0.016958
475	tas	2004	-2.2	0.0163654	0.0210212
476	tas	2004	-2.1	0.014763	0.01844
477	tas	2004	-2	0.0160892	0.020263
478	tas	2004	-1.9	0.0160387	0.0206721
479	tas	2004	-1.8	0.0163309	0.0213456
480	tas	2004	-1.7	0.0170094	0.0218046
481	tas	2004	-1.6	0.0178234	0.0219264
482	tas	2004	-1.5	0.0202843	0.0267729
483	tas	2004	-1.4	0.0180716	0.0230149
484	tas	2004	-1.3	0.023927	0.0298773
485	tas	2004	-1.2	0.0220805	0.0288138
486	tas	2004	-1.1	0.0244442	0.0325155
487	tas	2004	-1	0.0218961	0.0287848
488	tas	2004	-0.9	0.0264673	0.0350033
489	tas	2004	-0.8	0.0241952	0.0329953
490	tas	2004	-0.7	0.0243254	0.0327158
491	tas	2004	-0.6	0.0279347	0.0373953
492	tas	2004	-0.5	0.0322417	0.0447328
493	tas	2004	-0.4	0.0289889	0.0388763
494	tas	2004	-0.3	0.0294871	0.0404931
495	tas	2004	-0.2	0.0311626	0.0417718
496	tas	2004	-0.1	0.0360049	0.0485071
497	tas	2004	0	0.0379838	0.0523557
498	tas	2004	0.1	0.0418686	0.058622
499	tas	2004	0.2	0.0409301	0.0566049
500	tas	2004	0.3	0.0369809	0.0516509
501	tas	2004	0.4	0.0376627	0.0529622
502	tas	2004	0.5	0.0424584	0.0578941
503	tas	2004	0.6	0.0408861	0.0570915
504	tas	2004	0.7	0.0409748	0.0571941
505	tas	2004	0.8	0.0429668	0.0602688
506	tas	2004	0.9	0.0435837	0.0607815
507	tas	2004	1	0.0435861	0.0615475
508	tas	2004	1.1	0.0455791	0.0659348
509	tas	2004	1.2	0.0436383	0.0602896
510	tas	2004	1.3	0.0470971	0.0649505
511	tas	2004	1.4	0.0400422	0.054819
512	tas	2004	1.5	0.0473217	0.0642437
513	tas	2004	1.6	0.0485967	0.0655166
514	tas	2004	1.7	0.0479439	0.0639734
515	tas	2004	1.8	0.0429129	0.0594601
516	tas	2004	1.9	0.0500682	0.0678015
517	tas	2004	2	0.0486635	0.0658625
518	tas	2004	2.1	0.0467448	0.066825
519	tas	2004	2.2	0.0518341	0.0711628
520	tas	2004	2.3	0.0492896	0.0661713
521	tas	2004	2.4	0.0464061	0.0632793
522	tas	2004	2.5	0.0570295	0.0741863
523	tas	2004	2.6	0.0529304	0.069643
524	tas	2004	2.7	0.0484532	0.0638044
525	tas	2004	2.8	0.0516505	0.0703036
526	tas	2004	2.9	0.0593497	0.0770802
527	tas	2004	3	0.06776	0.0890663
528	tas	2004	3.1	0.0549669	0.0742042
529	tas	2004	3.2	0.0629181	0.0833466
530	tas	2004	3.3	0.0635424	0.0844084
531	tas	2004	3.4	0.0643232	0.085007
532	tas	2004	3.5	0.0639307	0.0839351
533	tas	2004	3.6	0.0529766	0.0700319
534	tas	2004	3.7	0.064905	0.0869548
535	tas	2004	3.8	0.0675734	0.0875186
536	tas	2004	3.9	0.0661017	0.0881745
537	tas	2004	4	0.0697104	0.0900864
538	tas	2004	4.1	0.0769937	0.0984787
539	tas	2004	4.2	0.0724404	0.0952466
540	tas	2004	4.3	0.0756862	0.0999886
541	tas	2004	4.4	0.0744282	0.0987773
542	tas	2004	4.5	0.0811273	0.102482
543	tas	2004	4.6	0.0769375	0.099731
544	tas	2004	4.7	0.0767903	0.100969
545	tas	2004	4.8	0.0801267	0.104102
546	tas	2004	4.9	0.088473	0.114037
547	tas	2004	5	0.0844911	0.112427
548	tas	2004	5.1	0.0901082	0.113942
549	tas	2004	5.2	0.0842719	0.10985
550	tas	2004	5.3	0.0948697	0.124116
551	tas	2004	5.4	0.0949877	0.124922
552	tas	2004	5.5	0.0953278	0.121473
553	tas	2004	5.6	0.0979254	0.126989
554	tas	2004	5.7	0.10175	0.131121
555	tas	2004	5.8	0.0981582	0.127544
556	tas	2004	5.9	0.101456	0.131016
557	tas	2004	6	0.100646	0.129402
558	tas	2004	6.1	0.108906	0.142156
559	tas	2004	6.2	0.116334	0.148435
560	tas	2004	6.3	0.116168	0.150986
561	tas	2004	6.4	0.113073	0.146141
562	tas	2004	6.5	0.116318	0.150508
563	tas	2004	6.6	0.116	0.145706
564	tas	2004	6.7	0.119873	0.149992
565	tas	2004	6.8	0.116765	0.148323
566	tas	2004	6.9	0.119115	0.151882
567	tas	2004	7	0.134606	0.174008
568	tas	2004	7.1	0.132327	0.167027
569	tas	2004	7.2	0.128341	0.164058
570	tas	2004	7.3	0.12964	0.16404
571	tas	2004	7.4	0.13992	0.177762
572	tas	2004	7.5	0.129371	0.165921
573	tas	2004	7.6	0.145788	0.185147
574	tas	2004	7.7	0.143536	0.185539
575	tas	2004	7.8	0.143214	0.183231
576	tas	2004	7.9	0.15007	0.189877
577	tas	2004	8	0.154348	0.197129
578	tas	2004	8.1	0.156008	0.197791
579	tas	2004	8.2	0.16756	0.215005
580	tas	2004	8.3	0.171518	0.219266
581	tas	2004	8.4	0.161301	0.202199
582	tas	2004	8.5	0.17071	0.217247
583	tas	2004	8.6	0.175476	0.225146
584	tas	2004	8.7	0.180798	0.23138
585	tas	2004	8.8	0.165402	0.213127
586	tas	2004	8.9	0.186723	0.237814
587	tas	2004	9	0.186554	0.240516
588	tas	2004	9.1	0.183025	0.23328
589	tas	2004	9.2	0.199036	0.253333
590	tas	2004	9.3	0.189044	0.242746
591	tas	2004	9.4	0.205466	0.269286
592	tas	2004	9.5	0.213087	0.27188
593	tas	2004	9.6	0.194896	0.248513
594	tas	2004	9.7	0.205501	0.261852
595	tas	2004	9.8	0.217379	0.279231
596	tas	2004	9.9	0.206721	0.2573
597	tas	2004	10	0.226308	0.287837
598	tas	2004	10.1	0.201849	0.254969
599	tas	2004	10.2	0.221863	0.279952
600	tas	2004	10.3	0.226281	0.289146
601	tas	2004	10.4	0.229015	0.292308
602	tas	2004	10.5	0.232387	0.292884
603	tas	2004	10.6	0.227465	0.290789
604	tas	2004	10.7	0.235485	0.297983
605	tas	2004	10.8	0.249071	0.311967
606	tas	2004	10.9	0.249083	0.315113
607	tas	2004	11	0.240577	0.304316
608	tas	2004	11.1	0.247372	0.308993
609	tas	2004	11.2	0.256113	0.324853
610	tas	2004	11.3	0.257966	0.322101
611	tas	2004	11.4	0.277371	0.348364
612	tas	2004	11.5	0.249358	0.308138
613	tas	2004	11.6	0.262433	0.329145
614	tas	2004	11.7	0.269298	0.333239
615	tas	2004	11.8	0.288967	0.363762
616	tas	2004	11.9	0.287446	0.357328
617	tas	2004	12	0.259054	0.32582
618	tas	2004	12.1	0.268661	0.329055
619	tas	2004	12.2	0.260699	0.327317
620	tas	2004	12.3	0.264514	0.324941
621	tas	2004	12.4	0.272405	0.335424
622	tas	2004	12.5	0.285701	0.351759
623	tas	2004	12.6	0.282126	0.345932
624	tas	2004	12.7	0.273191	0.332727
625	tas	2004	12.8	0.264018	0.313765
626	tas	2004	12.9	0.286204	0.351258
627	tas	2004	13	0.281879	0.339668
628	tas	2004	13.1	0.275804	0.340728
629	tas	2004	13.2	0.259568	0.314957
630	tas	2004	13.3	0.292995	0.359056
631	tas	2004	13.4	0.280269	0.341658
632	tas	2004	13.5	0.296229	0.360752
633	tas	2004	13.6	0.31304	0.389957
634	tas	2004	13.7	0.29244	0.360183
635	tas	2004	13.8	0.300195	0.370144
636	tas	2004	13.9	0.324398	0.394418
637	tas	2004	14	0.286328	0.343995
638	tas	2004	14.1	0.305581	0.367966
639	tas	2004	14.2	0.295908	0.357373
640	tas	2004	14.3	0.314702	0.375689
641	tas	2004	14.4	0.300858	0.357883
642	tas	2004	14.5	0.314645	0.376522
643	tas	2004	14.6	0.325434	0.3834
644	tas	2004	14.7	0.324559	0.387352
645	tas	2004	14.8	0.323261	0.382736
646	tas	2004	14.9	0.35132	0.417666
647	tas	2004	15	0.320197	0.383895
648	tas	2004	15.1	0.331151	0.391071
649	tas	2004	15.2	0.335151	0.397978
650	tas	2004	15.3	0.329304	0.390662
651	tas	2004	15.4	0.329939	0.389736
652	tas	2004	15.5	0.330421	0.392232
653	tas	2004	15.6	0.354661	0.41595
654	tas	2004	15.7	0.343226	0.393959
655	tas	2004	15.8	0.343061	0.398884
656	tas	2004	15.9	0.347347	0.406274
657	tas	2004	16	0.32627	0.379085
658	tas	2004	16.1	0.351662	0.405243
659	tas	2004	16.2	0.342222	0.387405
660	tas	2004	16.3	0.340346	0.388448
661	tas	2004	16.4	0.345079	0.394554
662	tas	2004	16.5	0.358493	0.405633
663	tas	2004	16.6	0.3457	0.388764
664	tas	2004	16.7	0.343655	0.385914
665	tas	2004	16.8	0.341403	0.388224
666	tas	2004	16.9	0.371599	0.417336
667	tas	2004	17	0.355398	0.392958
668	tas	2004	17.1	0.345314	0.388188
669	tas	2004	17.2	0.370012	0.412736
670	tas	2004	17.3	0.375672	0.41251
671	tas	2004	17.4	0.374212	0.407787
672	tas	2004	17.5	0.36321	0.400007
673	tas	2004	17.6	0.373954	0.414155
674	tas	2004	17.7	0.376012	0.41557
675	tas	2004	17.8	0.405093	0.43738
676	tas	2004	17.9	0.377986	0.404888
677	tas	2004	18	0.360776	0.388987
678	tas	2004	18.1	0.396533	0.422313
679	tas	2004	18.2	0.411431	0.434118
680	tas	2004	18.3	0.384496	0.408955
681	tas	2004	18.4	0.401619	0.424016
682	tas	2004	18.5	0.432985	0.453655
683	tas	2004	18.6	0.405832	0.413493
684	tas	2004	18.7	0.441448	0.45086
685	tas	2004	18.8	0.442185	0.446574
686	tas	2004	18.9	0.441746	0.442925
687	tas	2004	19	0.460249	0.466512
688	tas	2004	19.1	0.45881	0.460942
689	tas	2004	19.2	0.493838	0.488582
690	tas	2004	19.3	0.497111	0.488079
691	tas	2004	19.4	0.48597	0.475964
692	tas	2004	19.5	0.505973	0.485593
693	tas	2004	19.6	0.510128	0.491969
694	tas	2004	19.7	0.49644	0.474259
695	tas	2004	19.8	0.516873	0.490777
696	tas	2004	19.9	0.516795	0.494551
697	tas	2004	20	0.535659	0.508175
698	tas	2004	20.1	0.514046	0.490294
699	tas	2004	20.2	0.541694	0.511449
700	tas	2004	20.3	0.521295	0.489205
701	tas	2004	20.4	0.551834	0.520863
702	tas	2004	20.5	0.584589	0.548941
703	tas	2004	20.6	0.541932	0.503742
704	tas	2004	20.7	0.547653	0.514223
705	tas	2004	20.8	0.52846	0.491342
706	tas	2004	20.9	0.554933	0.512808
707	tas	2004	21	0.547159	0.50854
708	tas	2004	21.1	0.591554	0.541686
709	tas	2004	21.2	0.573694	0.525501
710	tas	2004	21.3	0.603629	0.546621
711	tas	2004	21.4	0.616664	0.561048
712	tas	2004	21.5	0.631864	0.57043
713	tas	2004	21.6	0.631291	0.567861
714	tas	2004	21.7	0.668526	0.601661
715	tas	2004	21.8	0.656222	0.587243
716	tas	2004	21.9	0.70772	0.631253
717	tas	2004	22	0.705362	0.62404
718	tas	2004	22.1	0.756434	0.666263
719	tas	2004	22.2	0.753122	0.657093
720	tas	2004	22.3	0.787619	0.691182
721	tas	2004	22.4	0.821803	0.715121
722	tas	2004	22.5	0.836026	0.724434
723	tas	2004	22.6	0.904978	0.779636
724	tas	2004	22.7	0.969595	0.830909
725	tas	2004	22.8	0.968718	0.829861
726	tas	2004	22.9	0.985056	0.841711
727	tas	2004	23	1.02615	0.872669
728	tas	2004	23.1	1.00355	0.853118
729	tas	2004	23.2	1.03714	0.876998
730	tas	2004	23.3	1.07879	0.912573
731	tas	2004	23.4	1.12214	0.94727
732	tas	2004	23.5	1.18368	0.997862
733	tas	2004	23.6	1.1649	0.981806
734	tas	2004	23.7	1.23692	1.04166
735	tas	2004	23.8	1.2933	1.08622
736	tas	2004	23.9	1.23447	1.03627
737	tas	2004	24	1.23455	1.03395
738	tas	2004	24.1	1.23148	1.032
739	tas	2004	24.2	1.28279	1.0737
740	tas	2004	24.3	1.19295	0.997313
741	tas	2004	24.4	1.19696	1.00288
742	tas	2004	24.5	1.11016	0.930448
743	tas	2004	24.6	1.0854	0.908683
744	tas	2004	24.7	1.03926	0.871158
745	tas	2004	24.8	1.01639	0.853445
746	tas	2004	24.9	0.955564	0.802141
747	tas	2004	25	0.909308	0.763905
748	tas	2004	25.1	0.858487	0.721083
749	tas	2004	25.2	0.772586	0.650839
750	tas	2004	25.3	0.748263	0.630475
751	tas	2004	25.4	0.732576	0.616078
752	tas	2004	25.5	0.618195	0.522461
753	tas	2004	25.6	0.604294	0.510379
754	tas	2004	25.7	0.567664	0.477733
755	tas	2004	25.8	0.555105	0.469643
756	tas	2004	25.9	0.487939	0.412687
757	tas	2004	26	0.44111	0.373257
758	tas	2004	26.1	0.396469	0.336267
759	tas	2004	26.2	0.3783	0.323335
760	tas	2004	26.3	0.370095	0.315539
761	tas	2004	26.4	0.318402	0.270916
762	tas	2004	26.5	0.314292	0.269198
763	tas	2004	26.6	0.287431	0.245997
764	tas	2004	26.7	0.269872	0.230322
765	tas	2004	26.8	0.242253	0.207413
766	tas	2004	26.9	0.241456	0.207111
767	tas	2004	27	0.206886	0.177247
768	tas	2004	27.1	0.19897	0.17164
769	tas	2004	27.2	0.165076	0.142163
770	tas	2004	27.3	0.175882	0.151327
771	tas	2004	27.4	0.148675	0.128474
772	tas	2004	27.5	0.152447	0.132146
773	tas	2004	27.6	0.148249	0.127452
774	tas	2004	27.7	0.128492	0.110368
775	tas	2004	27.8	0.138612	0.120246
776	tas	2004	27.9	0.111509	0.0960902
777	tas	2004	28	0.115719	0.0997577
778	tas	2004	28.1	0.100625	0.0863857
779	tas	2004	28.2	0.105111	0.0908362
780	tas	2004	28.3	0.0906574	0.0778984
781	tas	2004	28.4	0.0787811	0.0686623
782	tas	2004	28.5	0.0756973	0.0653215
783	tas	2004	28.6	0.0762363	0.0650916
784	tas	2004	28.7	0.0692519	0.0597014
785	tas	2004	28.8	0.0659316	0.0573899
786	tas	2004	28.9	0.0671958	0.0579524
787	tas	2004	29	0.0585467	0.050252
788	tas	2004	29.1	0.0434904	0.0377063
789	tas	2004	29.2	0.0543525	0.0470538
790	tas	2004	29.3	0.0551782	0.0474707
791	tas	2004	29.4	0.0335618	0.0288435
792	tas	2004	29.5	0.0375323	0.0326643
793	tas	2004	29.6	0.0382381	0.0330865
794	tas	2004	29.7	0.032417	0.0278452
795	tas	2004	29.8	0.0342396	0.0295382
796	tas	2004	29.9	0.0207215	0.0180495
797	tas	2004	30	0.0223169	0.0196614
798	tas	2004	30.1	0.0188174	0.0165177
799	tas	2004	30.2	0.0294277	0.025404
800	tas	2004	30.3	0.0250635	0.021699
801	tas	2004	30.4	0.0167967	0.0145631
802	tas	2004	30.5	0.015567	0.0132042
803	tas	2004	30.6	0.0143048	0.0121532
804	tas	2004	30.7	0.0136011	0.0119558
805	tas	2004	30.8	0.017323	0.0145289
806	tas	2004	30.9	0.00962761	0.00800624
807	tas	2004	31	0.01138	0.00952274
808	tas	2004	31.1	0.00923783	0.0075965
809	tas	2004	31.2	0.0107321	0.00909346
810	tas	2004	31.3	0.0107326	0.00908792
811	tas	2004	31.4	0.00786347	0.00650733
812	tas	2004	31.5	0.0111241	0.00927488
813	tas	2004	31.6	0.00680354	0.00575788
814	tas	2004	31.7	0.0101432	0.00852314
815	tas	2004	31.8	0.0105039	0.00885113
816	tas	2004	31.9	0.00319559	0.00247245
817	tas	2004	32	0.00331233	0.00265094
818	tas	2004	32.1	0.0021685	0.00172528
819	tas	2004	32.2	0.00357128	0.00288154
820	tas	2004	32.3	0.00629882	0.00521525
821	tas	2004	32.4	0.00290751	0.00227279
822	tas	2004	32.5	0.00417959	0.00337336
823	tas	2004	32.6	0.00406791	0.00347792
824	tas	2004	32.7	0.00509931	0.00424496
825	tas	2004	32.8	0.00389866	0.00323982
826	tas	2004	32.9	0.00225809	0.00182039
827	tas	2004	33	0.00601144	0.00514652
828	tas	2004	33.1	0.00252711	0.0020891
829	tas	2004	33.2	-0.000465646	-0.00047814
830	tas	2004	33.3	0.000518652	0.000398016
831	tas	2004	33.4	0.00308996	0.00252489
832	tas	2004	33.5	-0.000748721	-0.000764112
833	tas	2004	33.6	-0.00146268	-0.00123248
834	tas	2004	33.7	-0.00107845	-0.000968332
835	tas	2004	33.8	0.000948535	0.000811666
836	tas	2004	33.9	-0.000107423	-0.000112369
837	tas	2004	34	-0.00166015	-0.00148588
838	tas	2004	34.1	-0.000129244	-0.000195425
839	tas	2004	34.2	-0.000840014	-0.000691154
840	tas	2004	34.3	0.000267208	0.000199659
841	tas	2004	34.4	-0.000512995	-0.000457621
842	tas	2004	34.5	-0.000948196	-0.000836745
843	tas	2004	34.6	-0.00132247	-0.00118493
844	tas	2004	34.7	-0.00208695	-0.0018523
845	tas	2004	34.8	0.000473018	0.000362188
846	tas	2004	34.9	0.000453011	0.000366422
847	tas	2004	35	-0.00105383	-0.000904819
848	tas	2004	35.1	-0.0014106	-0.00129567
849	tas	2004	35.2	0.000235391	0.000173928
850	tas	2004	35.3	-0.00114203	-0.00101719
851	tas	2004	35.4	0.000972875	0.000874528
852	tas	2004	35.5	0.000134038	7.75187e-05
853	tas	2004	35.6	0.000105444	6.54674e-05
854	tas	2004	35.7	0.0016357	0.00140446
855	tas	2004	35.8	0.00059489	0.00046902
856	tas	2004	35.9	0.00158855	0.0013442
857	tas	2004	36	0.000915057	0.000745221
858	tas	2004	36.1	-0.00124905	-0.00114877
859	tas	2004	36.2	0.000398018	0.000262195
860	tas	2004	36.3	0.000224899	0.000123444
861	tas	2004	36.4	0.00149816	0.00127808
862	tas	2004	36.5	-0.000239002	-0.000278155
863	tas	2004	36.6	0.000318996	0.000248516
864	tas	2004	36.7	-0.000376652	-0.000360559
865	tas	2004	36.8	0.00121237	0.000996017
866	tas	2004	36.9	-0.000245118	-0.000231905
867	tas	2004	37	3.93621e-05	-2.31253e-05
868	tas	2004	37.1	-0.000112826	-0.000131261
869	tas	2004	37.2	-0.000301522	-0.000306817
870	tas	2004	37.3	-0.000492541	-0.000473906
871	tas	2004	37.4	-0.000586096	-0.000542631
872	tas	2004	37.5	-0.000309342	-0.000287926
873	tas	2004	37.6	-0.00048807	-0.000450129
874	tas	2004	37.7	-0.000349001	-0.000314635
875	tas	2004	37.8	-0.000392172	-0.000359582
876	tas	2004	37.9	-0.000742766	-0.000689525
877	tas	2004	38	-0.000317595	-0.000284344
878	tas	2004	38.1	-0.000405241	-0.000369679
879	tas	2004	38.2	-0.000201504	-0.000182397
880	tas	2004	38.3	-0.000317049	-0.000289229
881	tas	2004	38.4	-0.000345587	-0.000312355
882	tas	2004	38.5	-0.000571291	-0.000513968
883	tas	2004	38.6	-0.000345275	-0.000313006
884	tas	2004	38.7	-0.000139174	-0.000125072
885	tas	2004	38.9	-0.000146105	-0.000135495
886	tas	2004	39	-0.00031188	-0.000281412
887	tas	2004	39.1	-0.00014871	-0.000134843
888	tas	2004	39.2	-6.83917e-05	-6.22103e-05
889	tas	2004	39.3	-0.000140856	-0.000125724
890	tas	2004	39.5	-7.59017e-05	-6.77474e-05
891	tas	2004	39.6	-0.000184556	-0.000168391
892	tas	2004	39.7	-6.98697e-05	-6.28618e-05
893	tas	2004	39.8	-6.44394e-05	-5.79761e-05
894	mrsos	2004	0.1	-0.0657368	-0.0561701
895	mrsos	2004	0.101	-0.0451278	-0.0373946
896	mrsos	2004	0.102	-0.0272511	-0.0226696
897	mrsos	2004	0.103	0.00201771	0.00291086
898	mrsos	2004	0.104	0.0120351	0.0119108
899	mrsos	2004	0.105	0.0200087	0.0185735
900	mrsos	2004	0.106	0.0377679	0.0341242
901	mrsos	2004	0.107	0.0402602	0.0364634
902	mrsos	2004	0.108	0.044948	0.0405833
903	mrsos	2004	0.109	0.0542694	0.0481883
904	mrsos	2004	0.11	0.0527556	0.047034
905	mrsos	2004	0.111	0.0500592	0.0447778
906	mrsos	2004	0.112	0.0619173	0.054936
907	mrsos	2004	0.113	0.0583793	0.0521495
908	mrsos	2004	0.114	0.0578584	0.0517245
909	mrsos	2004	0.115	0.0578235	0.0512584
910	mrsos	2004	0.116	0.0701343	0.0623566
911	mrsos	2004	0.117	0.0695305	0.0619781
912	mrsos	2004	0.118	0.0716192	0.0632135
913	mrsos	2004	0.119	0.0817041	0.0732105
914	mrsos	2004	0.12	0.0763202	0.0673067
915	mrsos	2004	0.121	0.0886641	0.0795983
916	mrsos	2004	0.122	0.0812115	0.07168
917	mrsos	2004	0.123	0.0904145	0.0805315
918	mrsos	2004	0.124	0.0815477	0.0723142
919	mrsos	2004	0.125	0.0926934	0.0824199
920	mrsos	2004	0.126	0.0854676	0.0759614
921	mrsos	2004	0.127	0.0810926	0.0721673
922	mrsos	2004	0.128	0.0847232	0.074782
923	mrsos	2004	0.129	0.0816033	0.0721562
924	mrsos	2004	0.13	0.086602	0.0772477
925	mrsos	2004	0.131	0.0894055	0.0800976
926	mrsos	2004	0.132	0.0877843	0.0778203
927	mrsos	2004	0.133	0.0818191	0.07265
928	mrsos	2004	0.134	0.0855813	0.0762608
929	mrsos	2004	0.135	0.0802024	0.0713312
930	mrsos	2004	0.136	0.0814601	0.0723249
931	mrsos	2004	0.137	0.0877664	0.0780688
932	mrsos	2004	0.138	0.0851568	0.0772532
933	mrsos	2004	0.139	0.0873044	0.0777851
934	mrsos	2004	0.14	0.0798714	0.0710019
935	mrsos	2004	0.141	0.0871763	0.0780642
936	mrsos	2004	0.142	0.0811687	0.0723962
937	mrsos	2004	0.143	0.07631	0.0680669
938	mrsos	2004	0.144	0.0923668	0.0824225
939	mrsos	2004	0.145	0.0891506	0.0800787
940	mrsos	2004	0.146	0.0975709	0.0874492
941	mrsos	2004	0.147	0.0909285	0.0827977
942	mrsos	2004	0.148	0.0851416	0.0770467
943	mrsos	2004	0.149	0.0907656	0.0819737
944	mrsos	2004	0.15	0.0892613	0.0792944
945	mrsos	2004	0.151	0.0911173	0.082231
946	mrsos	2004	0.152	0.0914736	0.0825499
947	mrsos	2004	0.153	0.0908898	0.0817656
948	mrsos	2004	0.154	0.0913338	0.0823639
949	mrsos	2004	0.155	0.0847729	0.076292
950	mrsos	2004	0.156	0.0906389	0.0816897
951	mrsos	2004	0.157	0.102228	0.0925703
952	mrsos	2004	0.158	0.109334	0.0993144
953	mrsos	2004	0.159	0.0852094	0.0777681
954	mrsos	2004	0.16	0.0907413	0.0816633
955	mrsos	2004	0.161	0.099868	0.0908193
956	mrsos	2004	0.162	0.0949383	0.0861646
957	mrsos	2004	0.163	0.104751	0.0952102
958	mrsos	2004	0.164	0.108831	0.0989799
959	mrsos	2004	0.165	0.085412	0.0779095
960	mrsos	2004	0.166	0.101143	0.0908848
961	mrsos	2004	0.167	0.103228	0.0936604
962	mrsos	2004	0.168	0.091671	0.0829026
963	mrsos	2004	0.169	0.106352	0.0967859
964	mrsos	2004	0.17	0.100196	0.0919101
965	mrsos	2004	0.171	0.113677	0.103306
966	mrsos	2004	0.172	0.107978	0.098551
967	mrsos	2004	0.173	0.0954611	0.0870691
968	mrsos	2004	0.174	0.0993095	0.090846
969	mrsos	2004	0.175	0.110514	0.101173
970	mrsos	2004	0.176	0.112616	0.102493
971	mrsos	2004	0.177	0.0957387	0.0874078
972	mrsos	2004	0.178	0.11334	0.103543
973	mrsos	2004	0.179	0.10218	0.0942389
974	mrsos	2004	0.18	0.109798	0.100342
975	mrsos	2004	0.181	0.128015	0.116512
976	mrsos	2004	0.182	0.107841	0.0984295
977	mrsos	2004	0.183	0.119328	0.10864
978	mrsos	2004	0.184	0.123989	0.114304
979	mrsos	2004	0.185	0.112739	0.103802
980	mrsos	2004	0.186	0.11441	0.104512
981	mrsos	2004	0.187	0.117859	0.108416
982	mrsos	2004	0.188	0.1132	0.103871
983	mrsos	2004	0.189	0.117741	0.107748
984	mrsos	2004	0.19	0.113457	0.104939
985	mrsos	2004	0.191	0.127059	0.117963
986	mrsos	2004	0.192	0.124684	0.115477
987	mrsos	2004	0.193	0.119575	0.110944
988	mrsos	2004	0.194	0.112832	0.104782
989	mrsos	2004	0.195	0.132258	0.122645
990	mrsos	2004	0.196	0.12109	0.112021
991	mrsos	2004	0.197	0.120074	0.112015
992	mrsos	2004	0.198	0.140799	0.129846
993	mrsos	2004	0.199	0.126996	0.117231
994	mrsos	2004	0.2	0.141514	0.130883
995	mrsos	2004	0.201	0.132758	0.123743
996	mrsos	2004	0.202	0.134336	0.126484
997	mrsos	2004	0.203	0.133588	0.124892
998	mrsos	2004	0.204	0.137165	0.128311
999	mrsos	2004	0.205	0.14109	0.131637
1000	mrsos	2004	0.206	0.157414	0.146759
1001	mrsos	2004	0.207	0.140276	0.13222
1002	mrsos	2004	0.208	0.134859	0.126857
1003	mrsos	2004	0.209	0.139822	0.132604
1004	mrsos	2004	0.21	0.14065	0.133361
1005	mrsos	2004	0.211	0.149857	0.14154
1006	mrsos	2004	0.212	0.15348	0.147082
1007	mrsos	2004	0.213	0.166397	0.157073
1008	mrsos	2004	0.214	0.154399	0.14677
1009	mrsos	2004	0.215	0.162086	0.154069
1010	mrsos	2004	0.216	0.1684	0.159932
1011	mrsos	2004	0.217	0.192238	0.182721
1012	mrsos	2004	0.218	0.176581	0.168171
1013	mrsos	2004	0.219	0.180728	0.172909
1014	mrsos	2004	0.22	0.193745	0.184968
1015	mrsos	2004	0.221	0.194733	0.185792
1016	mrsos	2004	0.222	0.194894	0.187561
1017	mrsos	2004	0.223	0.186902	0.180533
1018	mrsos	2004	0.224	0.235554	0.226794
1019	mrsos	2004	0.225	0.229508	0.222793
1020	mrsos	2004	0.226	0.228611	0.221125
1021	mrsos	2004	0.227	0.228909	0.222695
1022	mrsos	2004	0.228	0.225417	0.22067
1023	mrsos	2004	0.229	0.240788	0.237429
1024	mrsos	2004	0.23	0.25286	0.24783
1025	mrsos	2004	0.231	0.252759	0.25099
1026	mrsos	2004	0.232	0.284101	0.278936
1027	mrsos	2004	0.233	0.286128	0.287105
1028	mrsos	2004	0.234	0.289921	0.289989
1029	mrsos	2004	0.235	0.301718	0.305515
1030	mrsos	2004	0.236	0.307093	0.314125
1031	mrsos	2004	0.237	0.328774	0.337197
1032	mrsos	2004	0.238	0.325226	0.333551
1033	mrsos	2004	0.239	0.328854	0.335036
1034	mrsos	2004	0.24	0.329166	0.340933
1035	mrsos	2004	0.241	0.377979	0.387794
1036	mrsos	2004	0.242	0.369895	0.388615
1037	mrsos	2004	0.243	0.363098	0.38092
1038	mrsos	2004	0.244	0.370976	0.391859
1039	mrsos	2004	0.245	0.391193	0.406585
1040	mrsos	2004	0.246	0.390746	0.410794
1041	mrsos	2004	0.247	0.371206	0.402721
1042	mrsos	2004	0.248	0.416822	0.447542
1043	mrsos	2004	0.249	0.416908	0.453028
1044	mrsos	2004	0.25	0.41608	0.453713
1045	mrsos	2004	0.251	0.401313	0.442592
1046	mrsos	2004	0.252	0.443932	0.478958
1047	mrsos	2004	0.253	0.403529	0.4455
1048	mrsos	2004	0.254	0.43961	0.482353
1049	mrsos	2004	0.255	0.448885	0.494982
1050	mrsos	2004	0.256	0.443157	0.479379
1051	mrsos	2004	0.257	0.419738	0.458011
1052	mrsos	2004	0.258	0.441285	0.484271
1053	mrsos	2004	0.259	0.447843	0.490786
1054	mrsos	2004	0.26	0.47378	0.521572
1055	mrsos	2004	0.261	0.472579	0.521493
1056	mrsos	2004	0.262	0.445366	0.494618
1057	mrsos	2004	0.263	0.448589	0.490874
1058	mrsos	2004	0.264	0.472346	0.512438
1059	mrsos	2004	0.265	0.460999	0.503282
1060	mrsos	2004	0.266	0.466135	0.508782
1061	mrsos	2004	0.267	0.47615	0.518094
1062	mrsos	2004	0.268	0.475105	0.519453
1063	mrsos	2004	0.269	0.480318	0.526233
1064	mrsos	2004	0.27	0.474773	0.510644
1065	mrsos	2004	0.271	0.47658	0.521948
1066	mrsos	2004	0.272	0.434016	0.475659
1067	mrsos	2004	0.273	0.48388	0.533348
1068	mrsos	2004	0.274	0.448761	0.493657
1069	mrsos	2004	0.275	0.489566	0.525591
1070	mrsos	2004	0.276	0.46223	0.50727
1071	mrsos	2004	0.277	0.44488	0.49578
1072	mrsos	2004	0.278	0.460892	0.510045
1073	mrsos	2004	0.279	0.463604	0.510405
1074	mrsos	2004	0.28	0.471354	0.513708
1075	mrsos	2004	0.281	0.489514	0.531082
1076	mrsos	2004	0.282	0.464424	0.514003
1077	mrsos	2004	0.283	0.451313	0.486245
1078	mrsos	2004	0.284	0.457887	0.499752
1079	mrsos	2004	0.285	0.45116	0.480763
1080	mrsos	2004	0.286	0.439787	0.48155
1081	mrsos	2004	0.287	0.454046	0.490223
1082	mrsos	2004	0.288	0.453262	0.488534
1083	mrsos	2004	0.289	0.444539	0.479396
1084	mrsos	2004	0.29	0.427623	0.467141
1085	mrsos	2004	0.291	0.437084	0.467487
1086	mrsos	2004	0.292	0.469218	0.506687
1087	mrsos	2004	0.293	0.447005	0.485881
1088	mrsos	2004	0.294	0.445014	0.486458
1089	mrsos	2004	0.295	0.457304	0.49701
1090	mrsos	2004	0.296	0.456296	0.496802
1091	mrsos	2004	0.297	0.465923	0.510339
1092	mrsos	2004	0.298	0.440424	0.475727
1093	mrsos	2004	0.299	0.456715	0.491237
1094	mrsos	2004	0.3	0.454456	0.487527
1095	mrsos	2004	0.301	0.437776	0.470458
1096	mrsos	2004	0.302	0.462843	0.498877
1097	mrsos	2004	0.303	0.449686	0.483968
1098	mrsos	2004	0.304	0.421068	0.443733
1099	mrsos	2004	0.305	0.435945	0.463362
1100	mrsos	2004	0.306	0.443971	0.474338
1101	mrsos	2004	0.307	0.434036	0.468085
1102	mrsos	2004	0.308	0.415935	0.443334
1103	mrsos	2004	0.309	0.432151	0.46066
1104	mrsos	2004	0.31	0.418563	0.446776
1105	mrsos	2004	0.311	0.458488	0.491678
1106	mrsos	2004	0.312	0.434861	0.468057
1107	mrsos	2004	0.313	0.42001	0.44665
1108	mrsos	2004	0.314	0.439921	0.469016
1109	mrsos	2004	0.315	0.452522	0.485561
1110	mrsos	2004	0.316	0.444986	0.468304
1111	mrsos	2004	0.317	0.485147	0.508941
1112	mrsos	2004	0.318	0.449201	0.471374
1113	mrsos	2004	0.319	0.454682	0.477903
1114	mrsos	2004	0.32	0.464617	0.48627
1115	mrsos	2004	0.321	0.458141	0.482689
1116	mrsos	2004	0.322	0.438228	0.456489
1117	mrsos	2004	0.323	0.460429	0.48474
1118	mrsos	2004	0.324	0.456701	0.479956
1119	mrsos	2004	0.325	0.467485	0.493896
1120	mrsos	2004	0.326	0.461347	0.488499
1121	mrsos	2004	0.327	0.479736	0.499306
1122	mrsos	2004	0.328	0.485464	0.506451
1123	mrsos	2004	0.329	0.475065	0.497556
1124	mrsos	2004	0.33	0.506692	0.534463
1125	mrsos	2004	0.331	0.511489	0.542764
1126	mrsos	2004	0.332	0.53703	0.564647
1127	mrsos	2004	0.333	0.506979	0.53023
1128	mrsos	2004	0.334	0.509503	0.526878
1129	mrsos	2004	0.335	0.554405	0.571312
1130	mrsos	2004	0.336	0.52616	0.550877
1131	mrsos	2004	0.337	0.571116	0.592101
1132	mrsos	2004	0.338	0.590843	0.614107
1133	mrsos	2004	0.339	0.528506	0.558643
1134	mrsos	2004	0.34	0.568201	0.588903
1135	mrsos	2004	0.341	0.576593	0.605582
1136	mrsos	2004	0.342	0.556467	0.577044
1137	mrsos	2004	0.343	0.581399	0.607527
1138	mrsos	2004	0.344	0.583724	0.609987
1139	mrsos	2004	0.345	0.60381	0.633997
1140	mrsos	2004	0.346	0.600448	0.627055
1141	mrsos	2004	0.347	0.609432	0.639535
1142	mrsos	2004	0.348	0.65385	0.679353
1143	mrsos	2004	0.349	0.646273	0.67698
1144	mrsos	2004	0.35	0.662032	0.685349
1145	mrsos	2004	0.351	0.660766	0.678284
1146	mrsos	2004	0.352	0.660325	0.696139
1147	mrsos	2004	0.353	0.669631	0.697197
1148	mrsos	2004	0.354	0.635568	0.660726
1149	mrsos	2004	0.355	0.658111	0.689075
1150	mrsos	2004	0.356	0.703413	0.729767
1151	mrsos	2004	0.357	0.631013	0.645483
1152	mrsos	2004	0.358	0.642268	0.628065
1153	mrsos	2004	0.359	0.621477	0.635251
1154	mrsos	2004	0.36	0.636745	0.640698
1155	mrsos	2004	0.361	0.643078	0.637648
1156	mrsos	2004	0.362	0.673046	0.655314
1157	mrsos	2004	0.363	0.631318	0.610709
1158	mrsos	2004	0.364	0.615917	0.59087
1159	mrsos	2004	0.365	0.673621	0.636623
1160	mrsos	2004	0.366	0.65749	0.626452
1161	mrsos	2004	0.367	0.616206	0.584372
1162	mrsos	2004	0.368	0.634888	0.589582
1163	mrsos	2004	0.369	0.619353	0.568885
1164	mrsos	2004	0.37	0.636943	0.583241
1165	mrsos	2004	0.371	0.64436	0.586053
1166	mrsos	2004	0.372	0.610782	0.555053
1167	mrsos	2004	0.373	0.604403	0.544104
1168	mrsos	2004	0.374	0.648248	0.583768
1169	mrsos	2004	0.375	0.59987	0.539727
1170	mrsos	2004	0.376	0.673429	0.591999
1171	mrsos	2004	0.377	0.656096	0.576325
1172	mrsos	2004	0.378	0.659227	0.579601
1173	mrsos	2004	0.379	0.687588	0.598013
1174	mrsos	2004	0.38	0.646794	0.562772
1175	mrsos	2004	0.381	0.658582	0.575903
1176	mrsos	2004	0.382	0.63856	0.5501
1177	mrsos	2004	0.383	0.661999	0.574098
1178	mrsos	2004	0.384	0.644482	0.555645
1179	mrsos	2004	0.385	0.644262	0.546971
1180	mrsos	2004	0.386	0.609739	0.526262
1181	mrsos	2004	0.387	0.638267	0.543728
1182	mrsos	2004	0.388	0.610344	0.519484
1183	mrsos	2004	0.389	0.609669	0.518058
1184	mrsos	2004	0.39	0.556566	0.471347
1185	mrsos	2004	0.391	0.578749	0.489206
1186	mrsos	2004	0.392	0.493071	0.41568
1187	mrsos	2004	0.393	0.513387	0.433911
1188	mrsos	2004	0.394	0.454092	0.382525
1189	mrsos	2004	0.395	0.460851	0.389992
1190	mrsos	2004	0.396	0.402451	0.340236
1191	mrsos	2004	0.397	0.359008	0.303891
1192	mrsos	2004	0.398	0.33652	0.283756
1193	mrsos	2004	0.399	0.281184	0.236364
1194	mrsos	2004	0.4	0.241163	0.203136
1195	mrsos	2004	0.401	0.226357	0.191504
1196	mrsos	2004	0.402	0.189796	0.161406
1197	mrsos	2004	0.403	0.162745	0.137809
1198	mrsos	2004	0.404	0.142033	0.120759
1199	mrsos	2004	0.405	0.111591	0.0945724
1200	mrsos	2004	0.406	0.10785	0.0917853
1201	mrsos	2004	0.407	0.0963334	0.0821991
1202	mrsos	2004	0.408	0.0722111	0.0621472
1203	mrsos	2004	0.409	0.0582368	0.0498298
1204	mrsos	2004	0.41	0.0540737	0.0463851
1205	mrsos	2004	0.411	0.0445376	0.0378454
1206	mrsos	2004	0.412	0.0332767	0.0282526
1207	mrsos	2004	0.413	0.041491	0.0355892
1208	mrsos	2004	0.414	0.0233367	0.0197718
1209	mrsos	2004	0.415	0.0261752	0.0224736
1210	mrsos	2004	0.416	0.0157428	0.0135508
1211	mrsos	2004	0.417	0.016941	0.0147771
1212	mrsos	2004	0.418	0.0112042	0.0101527
1213	mrsos	2004	0.419	0.0151802	0.0135677
1214	mrsos	2004	0.42	0.00923551	0.00790951
1215	mrsos	2004	0.421	0.0061782	0.00562043
1216	mrsos	2004	0.422	0.0038105	0.00355153
1217	mrsos	2004	0.423	0.004581	0.00389059
1218	mrsos	2004	0.424	0.00432508	0.00376226
1219	mrsos	2004	0.425	0.00372924	0.00318217
1220	mrsos	2004	0.426	0.0015859	0.00131391
1221	mrsos	2004	0.427	0.0021367	0.00186794
1222	mrsos	2004	0.428	0.00114688	0.00115138
1223	mrsos	2004	0.429	0.000946437	0.000793426
1224	mrsos	2004	0.43	0.00133214	0.00112565
1225	mrsos	2004	0.431	0.000422157	0.000362839
1226	rsds	2004	2.6	-2.01338e-06	-4.23421e-06
1227	rsds	2004	2.7	-2.01338e-06	-4.23421e-06
1228	rsds	2004	2.8	-2.01338e-06	-4.23421e-06
1229	rsds	2004	2.9	-2.18104e-06	-4.23421e-06
1230	rsds	2004	3.1	-4.19441e-06	-8.46842e-06
1231	rsds	2004	3.2	-2.01338e-06	-4.23421e-06
1232	rsds	2004	3.3	-1.2413e-05	-2.54053e-05
1233	rsds	2004	3.4	-6.03752e-06	-1.27026e-05
1234	rsds	2004	3.5	-1.39207e-05	-2.96395e-05
1235	rsds	2004	3.6	-1.17371e-05	-2.54053e-05
1236	rsds	2004	3.7	-9.29623e-06	-2.11711e-05
1237	rsds	2004	3.8	-1.34906e-05	-2.96395e-05
1238	rsds	2004	3.9	-1.32308e-05	-2.96395e-05
1239	rsds	2004	4	-1.93579e-05	-4.23421e-05
1240	rsds	2004	4.1	-2.79243e-05	-6.35132e-05
1241	rsds	2004	4.2	-4.20049e-05	-8.89185e-05
1242	rsds	2004	4.3	-3.38261e-05	-7.19816e-05
1243	rsds	2004	4.4	-4.83254e-05	-0.000105855
1244	rsds	2004	4.5	-5.00403e-05	-0.000105855
1245	rsds	2004	4.6	-5.19688e-05	-0.00011009
1246	rsds	2004	4.7	-4.25506e-05	-8.89185e-05
1247	rsds	2004	4.8	-5.94001e-05	-0.000122792
1248	rsds	2004	4.9	-8.91441e-05	-0.00019054
1249	rsds	2004	5	-9.90646e-05	-0.000207476
1250	rsds	2004	5.1	-9.9791e-05	-0.000211711
1251	rsds	2004	5.2	-8.54363e-05	-0.000177837
1252	rsds	2004	5.3	-0.000137497	-0.000283692
1253	rsds	2004	5.4	-8.59771e-05	-0.000177837
1254	rsds	2004	5.5	-9.55084e-05	-0.000194774
1255	rsds	2004	5.6	-9.15312e-05	-0.000199008
1256	rsds	2004	5.7	-0.000156084	-0.000326034
1257	rsds	2004	5.8	-8.22791e-05	-0.000173603
1258	rsds	2004	5.9	-0.000122596	-0.000254053
1259	rsds	2004	6	-0.000112838	-0.000237116
1260	rsds	2004	6.1	-9.79321e-05	-0.000203242
1261	rsds	2004	6.2	-0.00012965	-0.000266755
1262	rsds	2004	6.3	-0.000115865	-0.000228647
1263	rsds	2004	6.4	-0.000105771	-0.000215945
1264	rsds	2004	6.5	-7.95758e-05	-0.000152432
1265	rsds	2004	6.6	-0.000112114	-0.000220179
1266	rsds	2004	6.7	-9.27422e-05	-0.000182071
1267	rsds	2004	6.8	-0.000104535	-0.000203242
1268	rsds	2004	6.9	-9.76315e-05	-0.000182071
1269	rsds	2004	7	-0.000132507	-0.000254704
1270	rsds	2004	7.1	-0.000189344	-0.000347205
1271	rsds	2004	7.2	-0.000179583	-0.000330269
1272	rsds	2004	7.3	-0.000155049	-0.000283692
1273	rsds	2004	7.4	-0.000173536	-0.000326034
1274	rsds	2004	7.5	-0.000144982	-0.000275224
1275	rsds	2004	7.6	-0.000215275	-0.000410719
1276	rsds	2004	7.7	-0.000187345	-0.000355674
1277	rsds	2004	7.8	-0.000152311	-0.000292161
1278	rsds	2004	7.9	-0.000150051	-0.000285646
1279	rsds	2004	8	-0.000222518	-0.00043189
1280	rsds	2004	8.1	-0.000184287	-0.000355674
1281	rsds	2004	8.2	-0.000153264	-0.000292161
1282	rsds	2004	8.3	-0.000200155	-0.000385313
1283	rsds	2004	8.4	-0.000250668	-0.000478466
1284	rsds	2004	8.5	-0.000243377	-0.000461529
1285	rsds	2004	8.6	-0.000174234	-0.0003218
1286	rsds	2004	8.7	-0.000212927	-0.000389548
1287	rsds	2004	8.8	-0.000192207	-0.000355674
1288	rsds	2004	8.9	-0.000213797	-0.00039085
1289	rsds	2004	9	-0.000188388	-0.000347205
1290	rsds	2004	9.1	-0.000182518	-0.000334503
1291	rsds	2004	9.2	-0.000226451	-0.000423421
1292	rsds	2004	9.3	-0.000212609	-0.000394433
1293	rsds	2004	9.4	-0.000211141	-0.000385313
1294	rsds	2004	9.5	-0.000201701	-0.000372611
1295	rsds	2004	9.6	-0.0001544	-0.000283692
1296	rsds	2004	9.7	-0.00017875	-0.000326034
1297	rsds	2004	9.8	-0.000255355	-0.000450781
1298	rsds	2004	9.9	-0.000200812	-0.000356977
1299	rsds	2004	10	-0.000230428	-0.000419187
1300	rsds	2004	10.1	-0.000239237	-0.000427655
1301	rsds	2004	10.2	-0.000251089	-0.000457295
1302	rsds	2004	10.3	-0.000230649	-0.000423421
1303	rsds	2004	10.4	-0.000241339	-0.00043873
1304	rsds	2004	10.5	-0.000225089	-0.000419187
1305	rsds	2004	10.6	-0.000213152	-0.000398016
1306	rsds	2004	10.7	-0.0002183	-0.000410719
1307	rsds	2004	10.8	-0.000214061	-0.000398667
1308	rsds	2004	10.9	-0.000211175	-0.00040225
1309	rsds	2004	11	-0.000193178	-0.000364142
1310	rsds	2004	11.1	-0.000253089	-0.000483352
1311	rsds	2004	11.2	-0.000248765	-0.000486934
1312	rsds	2004	11.3	-0.000247237	-0.000470649
1313	rsds	2004	11.4	-0.000287141	-0.000568687
1314	rsds	2004	11.5	-0.000192912	-0.000368376
1315	rsds	2004	11.6	-0.000227616	-0.000436124
1316	rsds	2004	11.7	-0.000266516	-0.000508757
1317	rsds	2004	11.8	-0.00022575	-0.000432541
1318	rsds	2004	11.9	-0.00023209	-0.000428958
1319	rsds	2004	12	-0.000231366	-0.000440358
1320	rsds	2004	12.1	-0.000225462	-0.00043189
1321	rsds	2004	12.2	-0.000257817	-0.000488237
1322	rsds	2004	12.3	-0.000275591	-0.000529277
1323	rsds	2004	12.4	-0.000268841	-0.000516574
1324	rsds	2004	12.5	-0.00019234	-0.000364142
1325	rsds	2004	12.6	-0.000208119	-0.000376845
1326	rsds	2004	12.7	-0.000200288	-0.000368376
1327	rsds	2004	12.8	-0.000233627	-0.000427655
1328	rsds	2004	12.9	-0.000214115	-0.000389548
1329	rsds	2004	13	-0.000226698	-0.000406484
1330	rsds	2004	13.1	-0.00022025	-0.000398667
1331	rsds	2004	13.2	-0.000222502	-0.000402902
1332	rsds	2004	13.3	-0.000254194	-0.000448826
1333	rsds	2004	13.4	-0.000289948	-0.000525042
1334	rsds	2004	13.5	-0.000289121	-0.000516248
1335	rsds	2004	13.6	-0.00020601	-0.000365445
1336	rsds	2004	13.7	-0.000244426	-0.000440684
1337	rsds	2004	13.8	-0.00021312	-0.000385313
1338	rsds	2004	13.9	-0.000222769	-0.000398667
1339	rsds	2004	14	-0.000200881	-0.000368376
1340	rsds	2004	14.1	-0.000199623	-0.000385313
1341	rsds	2004	14.2	-0.000276724	-0.000503546
1342	rsds	2004	14.3	-0.000252218	-0.000470649
1343	rsds	2004	14.4	-0.000240098	-0.000462181
1344	rsds	2004	14.5	-0.000240607	-0.000463483
1345	rsds	2004	14.6	-0.000218402	-0.000412673
1346	rsds	2004	14.7	-0.000244817	-0.000458598
1347	rsds	2004	14.8	-0.000263583	-0.000488889
1348	rsds	2004	14.9	-0.000214709	-0.00039997
1349	rsds	2004	15	-0.000195518	-0.000376845
1350	rsds	2004	15.1	-0.000220444	-0.000423421
1351	rsds	2004	15.2	-0.000204223	-0.000395736
1352	rsds	2004	15.3	-0.00019685	-0.000373262
1353	rsds	2004	15.4	-0.000169473	-0.000324406
1354	rsds	2004	15.5	-0.000184476	-0.000364142
1355	rsds	2004	15.6	-0.000185148	-0.000355674
1356	rsds	2004	15.7	-0.000262544	-0.000479769
1357	rsds	2004	15.8	-0.000192535	-0.000373262
1358	rsds	2004	15.9	-0.000247573	-0.000463483
1359	rsds	2004	16	-0.000198382	-0.000377171
1360	rsds	2004	16.1	-0.000200674	-0.000377496
1361	rsds	2004	16.2	-0.000146797	-0.00027099
1362	rsds	2004	16.3	-0.00019189	-0.000359908
1363	rsds	2004	16.4	-0.000205464	-0.000381079
1364	rsds	2004	16.5	-0.000229136	-0.000435147
1365	rsds	2004	16.6	-0.000177153	-0.000323103
1366	rsds	2004	16.7	-0.00017962	-0.00032636
1367	rsds	2004	16.8	-0.000161947	-0.000297046
1368	rsds	2004	16.9	-0.000175711	-0.000313657
1369	rsds	2004	17	-0.000146538	-0.000279458
1370	rsds	2004	17.1	-0.000194429	-0.000365445
1371	rsds	2004	17.2	-0.000201219	-0.000373913
1372	rsds	2004	17.3	-0.000192152	-0.000362514
1373	rsds	2004	17.4	-0.000209378	-0.000376845
1374	rsds	2004	17.5	-0.000207056	-0.000381079
1375	rsds	2004	17.6	-0.000241806	-0.000444592
1376	rsds	2004	17.7	-0.000157249	-0.000283692
1377	rsds	2004	17.8	-0.000235201	-0.000416256
1378	rsds	2004	17.9	-0.000221728	-0.000399319
1379	rsds	2004	18	-0.000272896	-0.000490191
1380	rsds	2004	18.1	-0.000294454	-0.000514945
1381	rsds	2004	18.2	-0.000237373	-0.000437427
1382	rsds	2004	18.3	-0.000259466	-0.000462832
1383	rsds	2004	18.4	-0.000236289	-0.000440358
1384	rsds	2004	18.5	-0.000194613	-0.000355674
1385	rsds	2004	18.6	-0.000261754	-0.000474557
1386	rsds	2004	18.7	-0.000200468	-0.000371634
1387	rsds	2004	18.8	-0.000204926	-0.000362514
1388	rsds	2004	18.9	-0.000168973	-0.000304863
1389	rsds	2004	19	-0.000203638	-0.000369679
1390	rsds	2004	19.1	-0.000185887	-0.000330269
1391	rsds	2004	19.2	-0.000206184	-0.000373913
1392	rsds	2004	19.3	-0.000153423	-0.000287926
1393	rsds	2004	19.4	-0.000236769	-0.000436775
1394	rsds	2004	19.5	-0.000189815	-0.000344925
1395	rsds	2004	19.6	-0.000232292	-0.000420816
1396	rsds	2004	19.7	-0.000242602	-0.000454038
1397	rsds	2004	19.8	-0.000219736	-0.00039085
1398	rsds	2004	19.9	-0.000190786	-0.000347857
1399	rsds	2004	20	-0.00020417	-0.000376845
1400	rsds	2004	20.1	-0.0002198	-0.000404856
1401	rsds	2004	20.2	-0.000251622	-0.000461203
1402	rsds	2004	20.3	-0.000176522	-0.000326034
1403	rsds	2004	20.4	-0.000236246	-0.000432541
1404	rsds	2004	20.5	-0.000232179	-0.000425375
1405	rsds	2004	20.6	-0.000183223	-0.000327989
1406	rsds	2004	20.7	-0.000214822	-0.000390199
1407	rsds	2004	20.8	-0.000191887	-0.000361211
1408	rsds	2004	20.9	-0.000178234	-0.000326034
1409	rsds	2004	21	-0.00015791	-0.000284995
1410	rsds	2004	21.1	-0.000169219	-0.000302583
1411	rsds	2004	21.2	-0.000171396	-0.000303886
1412	rsds	2004	21.3	-0.000158747	-0.000284995
1413	rsds	2004	21.4	-0.000160317	-0.000298349
1414	rsds	2004	21.5	-0.000190535	-0.000342971
1415	rsds	2004	21.6	-0.000188985	-0.000342645
1416	rsds	2004	21.7	-0.000159935	-0.000288578
1417	rsds	2004	21.8	-0.00014608	-0.000262521
1418	rsds	2004	21.9	-0.000170287	-0.000291509
1419	rsds	2004	22	-0.00018763	-0.00034232
1420	rsds	2004	22.1	-0.000191042	-0.00034004
1421	rsds	2004	22.2	-0.000165056	-0.000296395
1422	rsds	2004	22.3	-0.000194797	-0.000344274
1423	rsds	2004	22.4	-0.000153406	-0.000280109
1424	rsds	2004	22.5	-0.000170104	-0.000308446
1425	rsds	2004	22.6	-0.00019463	-0.000331246
1426	rsds	2004	22.7	-0.000192099	-0.000355022
1427	rsds	2004	22.8	-0.000204906	-0.000359908
1428	rsds	2004	22.9	-0.000208446	-0.000367399
1429	rsds	2004	23	-0.000228677	-0.000423421
1430	rsds	2004	23.1	-0.000239252	-0.00042049
1431	rsds	2004	23.2	-0.00018893	-0.000335806
1432	rsds	2004	23.3	-0.000209038	-0.000370331
1433	rsds	2004	23.4	-0.000208302	-0.000360559
1434	rsds	2004	23.5	-0.000197181	-0.000352742
1435	rsds	2004	23.6	-0.000186808	-0.000334503
1436	rsds	2004	23.7	-0.000192491	-0.000335154
1437	rsds	2004	23.8	-0.000218768	-0.000381079
1438	rsds	2004	23.9	-0.00021605	-0.000385965
1439	rsds	2004	24	-0.000200383	-0.000348508
1440	rsds	2004	24.1	-0.000251126	-0.000442312
1441	rsds	2004	24.2	-0.000259843	-0.000444918
1442	rsds	2004	24.3	-0.000299093	-0.000526671
1443	rsds	2004	24.4	-0.000245357	-0.000432541
1444	rsds	2004	24.5	-0.000287226	-0.000508431
1445	rsds	2004	24.6	-0.000232615	-0.000419187
1446	rsds	2004	24.7	-0.000227399	-0.000403553
1447	rsds	2004	24.8	-0.000232502	-0.000402902
1448	rsds	2004	24.9	-0.000248483	-0.000436775
1449	rsds	2004	25	-0.00024064	-0.000424073
1450	rsds	2004	25.1	-0.000215672	-0.000376845
1451	rsds	2004	25.2	-0.000215016	-0.000378799
1452	rsds	2004	25.3	-0.000177476	-0.000322452
1453	rsds	2004	25.4	-0.00018674	-0.000324406
1454	rsds	2004	25.5	-0.000185596	-0.000326034
1455	rsds	2004	25.6	-0.00017306	-0.000311052
1456	rsds	2004	25.7	-0.000246965	-0.000433192
1457	rsds	2004	25.8	-0.000210196	-0.000367725
1458	rsds	2004	25.9	-0.000283769	-0.000512014
1459	rsds	2004	26	-0.000191608	-0.000333526
1460	rsds	2004	26.1	-0.000199707	-0.000357628
1461	rsds	2004	26.2	-0.000197214	-0.000348508
1462	rsds	2004	26.3	-0.000226423	-0.000374239
1463	rsds	2004	26.4	-0.000174903	-0.000313006
1464	rsds	2004	26.5	-0.000201383	-0.000343623
1465	rsds	2004	26.6	-0.000184714	-0.000328966
1466	rsds	2004	26.7	-0.000133345	-0.000249819
1467	rsds	2004	26.8	-0.000206456	-0.000366096
1468	rsds	2004	26.9	-0.000188363	-0.0003218
1469	rsds	2004	27	-0.00029669	-0.000487912
1470	rsds	2004	27.1	-0.000190025	-0.000320172
1471	rsds	2004	27.2	-0.000229262	-0.000392805
1472	rsds	2004	27.3	-0.000193764	-0.000343623
1473	rsds	2004	27.4	-0.000154176	-0.000270338
1474	rsds	2004	27.5	-0.00014518	-0.000255356
1475	rsds	2004	27.6	-0.000217407	-0.000373913
1476	rsds	2004	27.7	-0.000184674	-0.000320172
1477	rsds	2004	27.8	-0.000233096	-0.00039997
1478	rsds	2004	27.9	-0.000175236	-0.000300629
1479	rsds	2004	28	-0.000214266	-0.000373262
1480	rsds	2004	28.1	-0.000193298	-0.000332874
1481	rsds	2004	28.2	-0.000183397	-0.000325383
1482	rsds	2004	28.3	-0.000189084	-0.000339063
1483	rsds	2004	28.4	-0.000164631	-0.000295743
1484	rsds	2004	28.5	-0.000202493	-0.000343623
1485	rsds	2004	28.6	-0.000205997	-0.000352742
1486	rsds	2004	28.7	-0.000219911	-0.000375216
1487	rsds	2004	28.8	-0.000225444	-0.000395085
1488	rsds	2004	28.9	-0.000232161	-0.000405182
1489	rsds	2004	29	-0.00024619	-0.00042049
1490	rsds	2004	29.1	-0.000206855	-0.000370005
1491	rsds	2004	29.2	-0.000229437	-0.000398016
1492	rsds	2004	29.3	-0.000231672	-0.000406484
1493	rsds	2004	29.4	-0.000234483	-0.000393456
1494	rsds	2004	29.5	-0.000181142	-0.00031952
1495	rsds	2004	29.6	-0.000189864	-0.000320172
1496	rsds	2004	29.7	-0.000248265	-0.000423421
1497	rsds	2004	29.8	-0.000196353	-0.000342971
1498	rsds	2004	29.9	-0.000200348	-0.000345251
1499	rsds	2004	30	-0.00020703	-0.000348183
1500	rsds	2004	30.1	-0.000213316	-0.000373262
1501	rsds	2004	30.2	-0.000233466	-0.000395085
1502	rsds	2004	30.3	-0.000194537	-0.000339714
1503	rsds	2004	30.4	-0.000269782	-0.000451758
1504	rsds	2004	30.5	-0.000224643	-0.000386616
1505	rsds	2004	30.6	-0.000243642	-0.00042049
1506	rsds	2004	30.7	-0.000246437	-0.000417884
1507	rsds	2004	30.8	-0.000196055	-0.0003332
1508	rsds	2004	30.9	-0.000213775	-0.000360559
1509	rsds	2004	31	-0.000274024	-0.000460552
1510	rsds	2004	31.1	-0.000211774	-0.000375542
1511	rsds	2004	31.2	-0.000282612	-0.000471952
1512	rsds	2004	31.3	-0.000164247	-0.000277504
1513	rsds	2004	31.4	-0.000133023	-0.000234184
1514	rsds	2004	31.5	-0.000187239	-0.000319194
1515	rsds	2004	31.6	-0.000198539	-0.000335154
1516	rsds	2004	31.7	-0.000229947	-0.000390199
1517	rsds	2004	31.8	-0.000196079	-0.000345577
1518	rsds	2004	31.9	-0.000204268	-0.000335154
1519	rsds	2004	32	-0.000218071	-0.000372611
1520	rsds	2004	32.1	-0.00020086	-0.000341017
1521	rsds	2004	32.2	-0.00022065	-0.000368376
1522	rsds	2004	32.3	-0.000283099	-0.000469672
1523	rsds	2004	32.4	-0.000199951	-0.00033548
1524	rsds	2004	32.5	-0.000250834	-0.00041821
1525	rsds	2004	32.6	-0.0002072	-0.000329943
1526	rsds	2004	32.7	-0.000216033	-0.000368376
1527	rsds	2004	32.8	-0.000199602	-0.000340691
1528	rsds	2004	32.9	-0.000154194	-0.000260567
1529	rsds	2004	33	-0.000170957	-0.000313332
1530	rsds	2004	33.1	-0.000216228	-0.000365445
1531	rsds	2004	33.2	-0.000225373	-0.000389548
1532	rsds	2004	33.3	-0.000202903	-0.00034916
1533	rsds	2004	33.4	-0.000162033	-0.000288578
1534	rsds	2004	33.5	-0.000191821	-0.000320172
1535	rsds	2004	33.6	-0.000170169	-0.000278155
1536	rsds	2004	33.7	-0.000177826	-0.00030812
1537	rsds	2004	33.8	-0.00018019	-0.000316589
1538	rsds	2004	33.9	-0.000188462	-0.000334828
1539	rsds	2004	34	-0.0002136	-0.000366096
1540	rsds	2004	34.1	-0.000194827	-0.000335806
1541	rsds	2004	34.2	-0.000230844	-0.000399644
1542	rsds	2004	34.3	-0.000245426	-0.000419838
1543	rsds	2004	34.4	-0.00021629	-0.000363491
1544	rsds	2004	34.5	-0.000227493	-0.000378148
1545	rsds	2004	34.6	-0.000265021	-0.000444267
1546	rsds	2004	34.7	-0.000207827	-0.000375216
1547	rsds	2004	34.8	-0.000173535	-0.000303886
1548	rsds	2004	34.9	-0.00019832	-0.000328966
1549	rsds	2004	35	-0.000226825	-0.000375868
1550	rsds	2004	35.1	-0.000222884	-0.000386942
1551	rsds	2004	35.2	-0.000250144	-0.000407787
1552	rsds	2004	35.3	-0.000218473	-0.000373262
1553	rsds	2004	35.4	-0.000240604	-0.000391502
1554	rsds	2004	35.5	-0.000221489	-0.000365445
1555	rsds	2004	35.6	-0.000213605	-0.000361537
1556	rsds	2004	35.7	-0.000195241	-0.000320172
1557	rsds	2004	35.8	-0.000250015	-0.000412673
1558	rsds	2004	35.9	-0.000172386	-0.000275875
1559	rsds	2004	36	-0.000195535	-0.0003332
1560	rsds	2004	36.1	-0.0002622	-0.000428958
1561	rsds	2004	36.2	-0.000235063	-0.000384662
1562	rsds	2004	36.3	-0.000176647	-0.00030128
1563	rsds	2004	36.4	-0.000208641	-0.000352417
1564	rsds	2004	36.5	-0.00022061	-0.000362514
1565	rsds	2004	36.6	-0.000180441	-0.000296069
1566	rsds	2004	36.7	-0.000227186	-0.000369028
1567	rsds	2004	36.8	-0.000275127	-0.000468043
1568	rsds	2004	36.9	-0.00023167	-0.000387593
1569	rsds	2004	37	-0.000228534	-0.000378473
1570	rsds	2004	37.1	-0.000201422	-0.000336457
1571	rsds	2004	37.2	-0.000247636	-0.000408113
1572	rsds	2004	37.3	-0.000238519	-0.00040909
1573	rsds	2004	37.4	-0.000242506	-0.000397365
1574	rsds	2004	37.5	-0.000258265	-0.000416256
1575	rsds	2004	37.6	-0.000199528	-0.00033548
1576	rsds	2004	37.7	-0.000177276	-0.000306492
1577	rsds	2004	37.8	-0.000183029	-0.00033092
1578	rsds	2004	37.9	-0.000281203	-0.000467066
1579	rsds	2004	38	-0.00023359	-0.000390199
1580	rsds	2004	38.1	-0.000309951	-0.000496054
1581	rsds	2004	38.2	-0.000211653	-0.000355022
1582	rsds	2004	38.3	-0.00019902	-0.000330269
1583	rsds	2004	38.4	-0.000246006	-0.000402902
1584	rsds	2004	38.5	-0.00021195	-0.000345251
1585	rsds	2004	38.6	-0.000279944	-0.000435147
1586	rsds	2004	38.7	-0.00026395	-0.000431238
1587	rsds	2004	38.8	-0.000207979	-0.00035144
1588	rsds	2004	38.9	-0.000206402	-0.000338737
1589	rsds	2004	39	-0.000226164	-0.000384336
1590	rsds	2004	39.1	-0.000214551	-0.000356325
1591	rsds	2004	39.2	-0.000234829	-0.00039313
1592	rsds	2004	39.3	-0.000259444	-0.00043189
1593	rsds	2004	39.4	-2.7022e-05	-0.0001381
1594	rsds	2004	39.5	-0.000220127	-0.000371959
1595	rsds	2004	39.6	-0.00023007	-0.000388245
1596	rsds	2004	39.7	-0.000227586	-0.000377171
1597	rsds	2004	39.8	-0.00013633	-0.000253076
1598	rsds	2004	39.9	-0.000201869	-0.000338411
1599	rsds	2004	40	-0.000179089	-0.0003218
1600	rsds	2004	40.1	-0.000184455	-0.000334503
1601	rsds	2004	40.2	-0.000239767	-0.000408764
1602	rsds	2004	40.3	-0.000250889	-0.000399319
1603	rsds	2004	40.4	-0.000214131	-0.000336783
1604	rsds	2004	40.5	-0.000174002	-0.000313983
1605	rsds	2004	40.6	-0.000206911	-0.000341017
1606	rsds	2004	40.7	-0.000190518	-0.000324406
1607	rsds	2004	40.8	-0.000193366	-0.000316263
1608	rsds	2004	40.9	-0.000165824	-0.000282389
1609	rsds	2004	41	3.08615e-05	-4.9182e-05
1610	rsds	2004	41.1	-0.000192182	-0.000319194
1611	rsds	2004	41.2	-0.000226425	-0.000362188
1612	rsds	2004	41.3	-0.000257712	-0.000426027
1613	rsds	2004	41.4	-0.000171929	-0.000289229
1614	rsds	2004	41.5	-0.000147205	-0.000267081
1615	rsds	2004	41.6	-0.000229969	-0.000363491
1616	rsds	2004	41.7	-0.000179331	-0.000308446
1617	rsds	2004	41.8	-0.000194083	-0.000328314
1618	rsds	2004	41.9	-0.000200985	-0.000332874
1619	rsds	2004	42	-0.000177788	-0.000304863
1620	rsds	2004	42.1	-0.000244389	-0.000411044
1621	rsds	2004	42.2	-0.000186408	-0.000327011
1622	rsds	2004	42.3	-0.0002026	-0.00035144
1623	rsds	2004	42.4	-0.000199616	-0.000323103
1624	rsds	2004	42.5	-0.000203328	-0.000328966
1625	rsds	2004	42.6	-0.000146977	-0.00026871
1626	rsds	2004	42.7	-0.000220654	-0.000369354
1627	rsds	2004	42.8	-0.000207436	-0.000329291
1628	rsds	2004	42.9	-0.000213019	-0.000345903
1629	rsds	2004	43	-0.000150494	-0.000259264
1630	rsds	2004	43.1	-0.000260333	-0.000416256
1631	rsds	2004	43.2	-0.000135318	-0.00024363
1632	rsds	2004	43.3	-0.00018968	-0.000348183
1633	rsds	2004	43.4	-0.000139683	-0.000240699
1634	rsds	2004	43.5	-0.000184381	-0.000290206
1635	rsds	2004	43.6	-0.000219454	-0.000352742
1636	rsds	2004	43.7	-0.000148514	-0.000276852
1637	rsds	2004	43.8	-0.000132793	-0.000218876
1638	rsds	2004	43.9	-0.000177421	-0.000284669
1639	rsds	2004	44	-0.000158535	-0.000281087
1640	rsds	2004	44.1	1.93838e-05	-5.37419e-05
1641	rsds	2004	44.2	-0.000203835	-0.000345903
1642	rsds	2004	44.3	-0.000190849	-0.0003218
1643	rsds	2004	44.4	-0.000209979	-0.000348834
1644	rsds	2004	44.5	-0.000147037	-0.000256333
1645	rsds	2004	44.6	-0.000238868	-0.000390525
1646	rsds	2004	44.7	-0.000100696	-0.000244933
1647	rsds	2004	44.8	-0.000211533	-0.000358605
1648	rsds	2004	44.9	-0.000137588	-0.000256984
1649	rsds	2004	45	-0.000213875	-0.000378148
1650	rsds	2004	45.1	-0.000189213	-0.000311052
1651	rsds	2004	45.2	-3.27916e-05	-0.000141358
1652	rsds	2004	45.3	-0.000134075	-0.00024819
1653	rsds	2004	45.4	-9.61607e-05	-0.00019282
1654	rsds	2004	45.5	-0.000196541	-0.00034688
1655	rsds	2004	45.6	-0.000209534	-0.00034688
1656	rsds	2004	45.7	-0.000225573	-0.000383685
1657	rsds	2004	45.8	-4.97004e-05	-0.000170346
1658	rsds	2004	45.9	0.000124022	4.26678e-05
1659	rsds	2004	46	-0.000180034	-0.000314635
1660	rsds	2004	46.1	1.22041e-05	-0.000100644
1661	rsds	2004	46.2	-0.000275644	-0.000455015
1662	rsds	2004	46.3	-5.10888e-05	-0.000176534
1663	rsds	2004	46.4	-0.000157373	-0.000294115
1664	rsds	2004	46.5	4.52576e-06	-9.25013e-05
1665	rsds	2004	46.6	-0.000215403	-0.000359582
1666	rsds	2004	46.7	-0.000255438	-0.000419187
1667	rsds	2004	46.8	0.000426136	0.000344925
1668	rsds	2004	46.9	-0.000164553	-0.000287601
1669	rsds	2004	47	-0.000205823	-0.000318543
1670	rsds	2004	47.1	-8.43165e-05	-0.000163831
1671	rsds	2004	47.2	-0.000185999	-0.000326686
1672	rsds	2004	47.3	-0.00017468	-0.000286624
1673	rsds	2004	47.4	5.7293e-05	-3.5828e-06
1674	rsds	2004	47.5	-0.000155378	-0.000271641
1675	rsds	2004	47.6	-3.40979e-05	-0.000129632
1676	rsds	2004	47.7	-0.000205309	-0.000334177
1677	rsds	2004	47.8	-9.38707e-05	-0.000245259
1678	rsds	2004	47.9	0.0002977	0.000219202
1679	rsds	2004	48	-0.000139879	-0.000245584
1680	rsds	2004	48.1	3.60112e-05	-3.28966e-05
1681	rsds	2004	48.2	1.62082e-05	-7.16559e-05
1682	rsds	2004	48.3	-9.06852e-06	-0.000137775
1683	rsds	2004	48.4	-0.000148851	-0.000249493
1684	rsds	2004	48.5	0.00011326	1.75883e-05
1685	rsds	2004	48.6	-0.000195944	-0.000339714
1686	rsds	2004	48.7	7.62621e-05	-2.93138e-06
1687	rsds	2004	48.8	-8.41194e-05	-0.00018598
1688	rsds	2004	48.9	-4.51724e-06	-0.00010325
1689	rsds	2004	49	-2.59467e-05	-8.43585e-05
1690	rsds	2004	49.1	-2.54946e-05	-0.000122792
1691	rsds	2004	49.2	-0.000165353	-0.000280109
1692	rsds	2004	49.3	-0.000208794	-0.000322452
1693	rsds	2004	49.4	-0.00013587	-0.000233859
1694	rsds	2004	49.5	-1.38188e-05	-0.000115952
1695	rsds	2004	49.6	-0.000127439	-0.000221156
1696	rsds	2004	49.7	-0.000109819	-0.000194774
1697	rsds	2004	49.8	-0.000105425	-0.000178488
1698	rsds	2004	49.9	6.16265e-05	2.76852e-05
1699	rsds	2004	50	-8.26393e-05	-0.000183374
1700	rsds	2004	50.1	5.33311e-05	-8.46843e-05
1701	rsds	2004	50.2	-7.34072e-05	-0.000186957
1702	rsds	2004	50.3	-7.91681e-05	-0.00018826
1703	rsds	2004	50.4	-0.00019441	-0.000339714
1704	rsds	2004	50.5	2.95632e-05	-7.23073e-05
1705	rsds	2004	50.6	-0.000163717	-0.000281738
1706	rsds	2004	50.7	-0.00016596	-0.000305515
1707	rsds	2004	50.8	-0.000151954	-0.000285972
1708	rsds	2004	50.9	-8.23421e-05	-0.000168391
1709	rsds	2004	51	-0.000149607	-0.000275549
1710	rsds	2004	51.1	-5.32501e-05	-0.000155689
1711	rsds	2004	51.2	-0.000117202	-0.000233859
1712	rsds	2004	51.3	-0.000193223	-0.0003332
1713	rsds	2004	51.4	0.000119211	7.16558e-06
1714	rsds	2004	51.5	-0.000136565	-0.000232882
1715	rsds	2004	51.6	-0.000148291	-0.000282064
1716	rsds	2004	51.7	-0.000131536	-0.000253076
1717	rsds	2004	51.8	-0.000185877	-0.000318217
1718	rsds	2004	51.9	-4.30765e-05	-0.000130283
1719	rsds	2004	52	0.000564049	0.000505825
1720	rsds	2004	52.1	-0.000104953	-0.000210082
1721	rsds	2004	52.2	5.16534e-05	-3.9085e-05
1722	rsds	2004	52.3	4.30205e-05	-2.37767e-05
1723	rsds	2004	52.4	5.00658e-05	-2.24739e-05
1724	rsds	2004	52.5	0.000147043	0.00010325
1725	rsds	2004	52.6	-0.000112414	-0.000214316
1726	rsds	2004	52.7	-0.000167099	-0.000266104
1727	rsds	2004	52.8	-0.000124147	-0.000242979
1728	rsds	2004	52.9	0.000304263	0.000233859
1729	rsds	2004	53	-0.0001659	-0.000265453
1730	rsds	2004	53.1	-6.92848e-05	-0.000201614
1731	rsds	2004	53.2	-2.19566e-05	-0.000118884
1732	rsds	2004	53.3	-3.07071e-05	-9.93411e-05
1733	rsds	2004	53.4	-0.000143365	-0.000236464
1734	rsds	2004	53.5	-5.05172e-05	-0.000155689
1735	rsds	2004	53.6	-7.91038e-05	-0.000200311
1736	rsds	2004	53.7	-3.25184e-05	-0.000162854
1737	rsds	2004	53.8	-0.000121589	-0.000248516
1738	rsds	2004	53.9	-8.75144e-06	-0.000102273
1739	rsds	2004	54	-6.84834e-05	-0.000196728
1740	rsds	2004	54.1	4.0348e-05	-5.24391e-05
1741	rsds	2004	54.2	-0.000200104	-0.000323754
1742	rsds	2004	54.3	0.000276687	0.000199334
1743	rsds	2004	54.4	-0.000154627	-0.000299652
1744	rsds	2004	54.5	0.000317888	0.000255681
1745	rsds	2004	54.6	-7.48492e-05	-0.000193797
1746	rsds	2004	54.7	-7.51523e-06	-9.73869e-05
1747	rsds	2004	54.8	-1.74e-05	-9.47812e-05
1748	rsds	2004	54.9	-5.12324e-05	-0.000210408
1749	rsds	2004	55	3.36297e-05	-5.79761e-05
1750	rsds	2004	55.1	-4.88095e-05	-0.000154386
1751	rsds	2004	55.2	-9.18691e-05	-0.000186305
1752	rsds	2004	55.3	-0.000192765	-0.000298023
1753	rsds	2004	55.4	-6.91491e-05	-0.000144289
1754	rsds	2004	55.5	-5.95579e-06	-0.000109112
1755	rsds	2004	55.6	-0.0001015	-0.000240699
1756	rsds	2004	55.7	0.000185882	5.1462e-05
1757	rsds	2004	55.8	0.000137058	7.88215e-05
1758	rsds	2004	55.9	-0.000124613	-0.000237442
1759	rsds	2004	56	9.51318e-05	1.82397e-05
1760	rsds	2004	56.1	0.000688292	0.000612332
1761	rsds	2004	56.2	-0.000126457	-0.000208128
1762	rsds	2004	56.3	-4.05229e-05	-0.000136472
1763	rsds	2004	56.4	-0.000186182	-0.00030128
1764	rsds	2004	56.5	0.000243973	0.000213339
1765	rsds	2004	56.6	0.00020065	0.00018142
1766	rsds	2004	56.7	7.3549e-05	1.3354e-05
1767	rsds	2004	56.8	0.000154629	7.00273e-05
1768	rsds	2004	56.9	0.000328957	0.000236139
1769	rsds	2004	57	0.000122289	6.90502e-05
1770	rsds	2004	57.1	0.000505417	0.000463158
1771	rsds	2004	57.2	-0.000144609	-0.000232882
1772	rsds	2004	57.3	-0.000180238	-0.000324406
1773	rsds	2004	57.4	-1.07884e-06	-0.000135821
1774	rsds	2004	57.5	-3.95962e-05	-0.000125398
1775	rsds	2004	57.6	0.00014662	0.000111392
1776	rsds	2004	57.7	-8.26649e-05	-0.000163506
1777	rsds	2004	57.8	-3.68551e-05	-0.000119209
1778	rsds	2004	57.9	0.000127827	5.60219e-05
1779	rsds	2004	58	8.61717e-05	2.93137e-06
1780	rsds	2004	58.1	5.11801e-05	3.90849e-06
1781	rsds	2004	58.2	0.000143735	5.43933e-05
1782	rsds	2004	58.3	0.000241035	0.000194122
1783	rsds	2004	58.4	-4.16004e-05	-0.00010781
1784	rsds	2004	58.5	-4.33589e-05	-0.00010553
1785	rsds	2004	58.6	0.000325105	0.000261544
1786	rsds	2004	58.7	-1.50517e-05	-0.000127678
1787	rsds	2004	58.8	-1.80777e-05	-0.00010553
1788	rsds	2004	58.9	0.000307288	0.000290858
1789	rsds	2004	59	-5.01578e-05	-0.000140706
1790	rsds	2004	59.1	-2.90443e-05	-0.000104552
1791	rsds	2004	59.2	0.00030535	0.000282389
1792	rsds	2004	59.3	6.91556e-05	-3.3548e-05
1793	rsds	2004	59.4	-8.30227e-06	-8.98956e-05
1794	rsds	2004	59.5	9.95578e-05	-5.53706e-06
1795	rsds	2004	59.6	0.000116706	4.78791e-05
1796	rsds	2004	59.7	0.000114996	2.54053e-05
1797	rsds	2004	59.8	-5.05338e-06	-9.47812e-05
1798	rsds	2004	59.9	-5.34603e-05	-9.67355e-05
1799	rsds	2004	60	-0.000114804	-0.000225716
1800	rsds	2004	60.1	0.000641181	0.000589207
1801	rsds	2004	60.2	0.000203128	0.000179791
1802	rsds	2004	60.3	0.000238814	0.000188911
1803	rsds	2004	60.4	9.24923e-05	-2.60567e-05
1804	rsds	2004	60.5	0.000128915	2.96395e-05
1805	rsds	2004	60.6	0.000269713	0.000238744
1806	rsds	2004	60.7	-3.20843e-05	-0.000131261
1807	rsds	2004	60.8	0.000174425	0.000113347
1808	rsds	2004	60.9	9.55983e-05	2.05196e-05
1809	rsds	2004	61	-1.01457e-05	-0.000106181
1810	rsds	2004	61.1	-3.28122e-05	-9.77126e-05
1811	rsds	2004	61.2	0.000318225	0.000282389
1812	rsds	2004	61.3	2.60541e-05	-7.58901e-05
1813	rsds	2004	61.4	0.000235959	0.000182723
1814	rsds	2004	61.5	-3.872e-05	-0.000139078
1815	rsds	2004	61.6	0.000346306	0.000276852
1816	rsds	2004	61.7	0.000281678	0.00026187
1817	rsds	2004	61.8	0.000231294	0.000190865
1818	rsds	2004	61.9	-0.000218989	-0.00034004
1819	rsds	2004	62	3.8133e-05	-3.64794e-05
1820	rsds	2004	62.1	0.000133414	0.000126049
1821	rsds	2004	62.2	8.3832e-05	-3.25721e-07
1822	rsds	2004	62.3	0.000391848	0.000331571
1823	rsds	2004	62.4	8.33893e-05	-1.62854e-05
1824	rsds	2004	62.5	0.000247764	0.000246236
1825	rsds	2004	62.6	0.000198762	0.000182071
1826	rsds	2004	62.7	0.000240923	0.000254053
1827	rsds	2004	62.8	0.000287767	0.000279784
1828	rsds	2004	62.9	0.000224478	0.000212036
1829	rsds	2004	63	0.000105862	9.11983e-06
1830	rsds	2004	63.1	5.08069e-05	1.43312e-05
1831	rsds	2004	63.2	0.000265714	0.000242001
1832	rsds	2004	63.3	0.000339155	0.000335154
1833	rsds	2004	63.4	7.0425e-05	7.16558e-06
1834	rsds	2004	63.5	9.85196e-05	0.000121489
1835	rsds	2004	63.6	9.57745e-05	8.14271e-06
1836	rsds	2004	63.7	7.61456e-05	4.72277e-05
1837	rsds	2004	63.8	7.32352e-05	2.37767e-05
1838	rsds	2004	63.9	0.000290084	0.000256658
1839	rsds	2004	64	0.00029014	0.000237116
1840	rsds	2004	64.1	0.000258255	0.000200311
1841	rsds	2004	64.2	0.000218648	0.000210082
1842	rsds	2004	64.3	0.000232395	0.000182723
1843	rsds	2004	64.4	0.000274211	0.000222133
1844	rsds	2004	64.5	0.000313588	0.000272292
1845	rsds	2004	64.6	0.000505816	0.000469672
1846	rsds	2004	64.7	0.000577591	0.000547842
1847	rsds	2004	64.8	1.49204e-05	-3.9085e-05
1848	rsds	2004	64.9	0.000212014	0.000204871
1849	rsds	2004	65	-7.98493e-05	-0.000143638
1850	rsds	2004	65.1	6.79796e-05	5.24391e-05
1851	rsds	2004	65.2	0.000258549	0.000235487
1852	rsds	2004	65.3	0.000439922	0.000400296
1853	rsds	2004	65.4	0.000159057	0.000118884
1854	rsds	2004	65.5	-2.13255e-05	-0.000128655
1855	rsds	2004	65.6	0.000430038	0.000371308
1856	rsds	2004	65.7	0.000857398	0.000853031
1857	rsds	2004	65.8	0.000290263	0.000272292
1858	rsds	2004	65.9	0.000726168	0.000732844
1859	rsds	2004	66	-0.000123907	-0.000219853
1860	rsds	2004	66.1	0.00014	9.08727e-05
1861	rsds	2004	66.2	0.000271278	0.000262195
1862	rsds	2004	66.3	0.000250671	0.000238419
1863	rsds	2004	66.4	0.000721824	0.00076509
1864	rsds	2004	66.5	0.000156033	0.000119209
1865	rsds	2004	66.6	0.000113537	0.000111718
1866	rsds	2004	66.7	0.000130007	9.86897e-05
1867	rsds	2004	66.8	9.89785e-05	6.22103e-05
1868	rsds	2004	66.9	0.000579582	0.00072633
1869	rsds	2004	67	0.000429627	0.000532534
1870	rsds	2004	67.1	0.000253385	0.00026871
1871	rsds	2004	67.2	5.22224e-05	6.67703e-05
1872	rsds	2004	67.3	0.000406943	0.000391827
1873	rsds	2004	67.4	0.000148046	9.18498e-05
1874	rsds	2004	67.5	0.000399153	0.000408113
1875	rsds	2004	67.6	0.000294815	0.00026187
1876	rsds	2004	67.7	0.000606634	0.000655326
1877	rsds	2004	67.8	0.00014841	0.00010553
1878	rsds	2004	67.9	0.000459262	0.000484654
1879	rsds	2004	68	0.000130554	9.51069e-05
1880	rsds	2004	68.1	0.00056939	0.000645229
1881	rsds	2004	68.2	0.000474727	0.000517877
1882	rsds	2004	68.3	0.000655587	0.00067552
1883	rsds	2004	68.4	0.000201156	0.000202265
1884	rsds	2004	68.5	0.00148459	0.00149207
1885	rsds	2004	68.6	0.00037231	0.000290532
1886	rsds	2004	68.7	0.000184926	0.000191842
1887	rsds	2004	68.8	0.000116435	7.88215e-05
1888	rsds	2004	68.9	0.000414522	0.000505174
1889	rsds	2004	69	0.000365221	0.000378148
1890	rsds	2004	69.1	0.000175921	0.000231579
1891	rsds	2004	69.2	0.000726435	0.000851077
1892	rsds	2004	69.3	0.000614977	0.000614938
1893	rsds	2004	69.4	0.000453691	0.000402576
1894	rsds	2004	69.5	0.000662602	0.000748153
1895	rsds	2004	69.6	0.00093057	0.00117972
1896	rsds	2004	69.7	0.000322078	0.000307143
1897	rsds	2004	69.8	0.000586906	0.000541328
1898	rsds	2004	69.9	0.000302478	0.000360885
1899	rsds	2004	70	0.000274045	0.000325709
1900	rsds	2004	70.1	0.000416029	0.000504523
1901	rsds	2004	70.2	0.00051901	0.000552402
1902	rsds	2004	70.3	0.000274484	0.000246561
1903	rsds	2004	70.4	0.000489236	0.000515597
1904	rsds	2004	70.5	0.000342494	0.000461203
1905	rsds	2004	70.6	0.000232501	0.000295092
1906	rsds	2004	70.7	0.00137428	0.0014126
1907	rsds	2004	70.8	0.000433243	0.000474557
1908	rsds	2004	70.9	0.000127202	9.93411e-05
1909	rsds	2004	71	0.000231932	0.000177837
1910	rsds	2004	71.1	0.000111089	0.000113998
1911	rsds	2004	71.2	0.000862435	0.000941298
1912	rsds	2004	71.3	0.00148068	0.00145787
1913	rsds	2004	71.4	0.000713952	0.00071949
1914	rsds	2004	71.5	0.000437343	0.000526345
1915	rsds	2004	71.6	7.54721e-05	1.07484e-05
1916	rsds	2004	71.7	0.000435698	0.000481723
1917	rsds	2004	71.8	0.000527032	0.000650766
1918	rsds	2004	71.9	0.000292776	0.000375542
1919	rsds	2004	72	0.000732913	0.000782678
1920	rsds	2004	72.1	0.000689952	0.00071949
1921	rsds	2004	72.2	0.000739742	0.000770952
1922	rsds	2004	72.3	0.00100464	0.00100709
1923	rsds	2004	72.4	0.000681302	0.00082046
1924	rsds	2004	72.5	0.0010572	0.00118916
1925	rsds	2004	72.6	0.000672454	0.000741964
1926	rsds	2004	72.7	0.000436296	0.000444592
1927	rsds	2004	72.8	0.000241204	0.000252098
1928	rsds	2004	72.9	0.000902541	0.000928595
1929	rsds	2004	73	0.00053875	0.000547516
1930	rsds	2004	73.1	0.000733207	0.000783003
1931	rsds	2004	73.2	0.000544594	0.000629269
1932	rsds	2004	73.3	0.000906688	0.00101361
1933	rsds	2004	73.4	0.000200326	0.000242653
1934	rsds	2004	73.5	0.000548053	0.000640017
1935	rsds	2004	73.6	0.000205154	0.000206499
1936	rsds	2004	73.7	0.000721181	0.000935109
1937	rsds	2004	73.8	0.000325476	0.000322126
1938	rsds	2004	73.9	0.000646513	0.00075597
1939	rsds	2004	74	0.000443839	0.000628292
1940	rsds	2004	74.1	0.000195119	0.000184351
1941	rsds	2004	74.2	0.000218138	0.000237116
1942	rsds	2004	74.3	0.00103829	0.00115692
1943	rsds	2004	74.4	0.0011348	0.00118623
1944	rsds	2004	74.5	0.000477646	0.000555333
1945	rsds	2004	74.6	0.000687167	0.000752387
1946	rsds	2004	74.7	0.000978643	0.00114943
1947	rsds	2004	74.8	0.000547982	0.000552728
1948	rsds	2004	74.9	0.000927845	0.00101263
1949	rsds	2004	75	0.000424738	0.000511688
1950	rsds	2004	75.1	0.000823625	0.000908401
1951	rsds	2004	75.2	0.000963095	0.000996343
1952	rsds	2004	75.3	0.000555484	0.000644252
1953	rsds	2004	75.4	0.000622964	0.000677474
1954	rsds	2004	75.5	0.000353692	0.000327337
1955	rsds	2004	75.6	0.000693855	0.000890813
1956	rsds	2004	75.7	0.00109368	0.00118981
1957	rsds	2004	75.8	0.00150513	0.00147872
1958	rsds	2004	75.9	0.000113017	0.000109438
1959	rsds	2004	76	0.00109849	0.00111653
1960	rsds	2004	76.1	0.00137375	0.00154125
1961	rsds	2004	76.2	0.000733416	0.000764438
1962	rsds	2004	76.3	0.000988113	0.00117451
1963	rsds	2004	76.4	0.000636431	0.000653697
1964	rsds	2004	76.5	0.000330049	0.000352742
1965	rsds	2004	76.6	0.000610266	0.00081134
1966	rsds	2004	76.7	0.000655654	0.000716233
1967	rsds	2004	76.8	0.000466704	0.000546213
1968	rsds	2004	76.9	0.000819138	0.000776164
1969	rsds	2004	77	0.00109577	0.00120708
1970	rsds	2004	77.1	0.000646852	0.00075369
1971	rsds	2004	77.2	0.000902633	0.00106376
1972	rsds	2004	77.3	0.000331892	0.00038629
1973	rsds	2004	77.4	0.000568095	0.000647509
1974	rsds	2004	77.5	0.00110287	0.0012048
1975	rsds	2004	77.6	0.000679507	0.000690828
1976	rsds	2004	77.7	0.000679381	0.000874202
1977	rsds	2004	77.8	0.000722292	0.000871596
1978	rsds	2004	77.9	0.000706702	0.000799289
1979	rsds	2004	78	0.000708827	0.000965075
1980	rsds	2004	78.1	0.00100916	0.00130609
1981	rsds	2004	78.2	0.00112567	0.00138817
1982	rsds	2004	78.3	0.000519064	0.000561522
1983	rsds	2004	78.4	0.000827845	0.000856614
1984	rsds	2004	78.5	0.00112153	0.00116962
1985	rsds	2004	78.6	0.000693952	0.000650766
1986	rsds	2004	78.7	0.000750628	0.000913613
1987	rsds	2004	78.8	0.00103898	0.00131684
1988	rsds	2004	78.9	0.000510312	0.000545562
1989	rsds	2004	79	0.000859815	0.00102794
1990	rsds	2004	79.1	0.00138658	0.001424
1991	rsds	2004	79.2	0.000713665	0.000806455
1992	rsds	2004	79.3	0.000508294	0.000694736
1993	rsds	2004	79.4	0.000826258	0.000893419
1994	rsds	2004	79.5	0.000851918	0.00101849
1995	rsds	2004	79.6	0.000772691	0.00075369
1996	rsds	2004	79.7	0.000711783	0.000792775
1997	rsds	2004	79.8	0.000912218	0.000995691
1998	rsds	2004	79.9	0.000540235	0.000684965
1999	rsds	2004	80	0.000742843	0.000886579
[truncated: 54,076 more rows]

## Sheet: Plot D-F (2D)
	VarName	Year	BinID	npp	nppByArea	NPP_Var1_Var2_In	NPPArea_Var1_Var2_In	VAL1	VAL2
1	tas_mrsos	2004	1011	6.23063e-07	2.32414e-17	0	0	-8.96667	0.143333
2	tas_mrsos	2004	1012	3.5948e-08	3.93701e-18	0	0	-8.5	0.144
3	tas_mrsos	2004	1013	7.41169e-08	3.93701e-18	0	0	-6.85	0.1425
4	tas_mrsos	2004	1014	3.46835e-07	1.87008e-17	0	0	-5.6	0.144
5	tas_mrsos	2004	1016	1.15978e-06	6.2543e-17	0	0	-3.95	0.144
6	tas_mrsos	2004	1017	3.62413e-07	1.4073e-17	0	0	-2.26667	0.142333
7	tas_mrsos	2004	1018	6.75741e-06	8.87038e-17	0	0	-0.975	0.142125
8	tas_mrsos	2004	1019	8.38215e-06	1.28768e-16	0	0	0.1	0.143286
9	tas_mrsos	2004	1020	4.05866e-05	3.23949e-16	0	0	1.33077	0.142308
10	tas_mrsos	2004	1021	4.00293e-05	1.64953e-16	0	0	2.32963	0.143111
11	tas_mrsos	2004	1022	5.04746e-05	3.10753e-16	0	0	3.54118	0.142824
12	tas_mrsos	2004	1023	0.000141346	4.66242e-16	0	1	4.69	0.1432
13	tas_mrsos	2004	1024	0.000168611	4.41952e-16	0	1	5.98684	0.143316
14	tas_mrsos	2004	1025	0.00021494	5.1109e-16	0	1	6.98049	0.143024
15	tas_mrsos	2004	1026	0.00028364	5.61507e-16	0	1	8.25957	0.143
16	tas_mrsos	2004	1027	0.000249685	5.68614e-16	0	1	9.39512	0.142878
17	tas_mrsos	2004	1028	0.000520035	6.88978e-16	0	1	10.5829	0.142857
18	tas_mrsos	2004	1029	0.000557502	6.75634e-16	0	1	11.7481	0.143
19	tas_mrsos	2004	1030	0.000684449	7.06209e-16	0	1	12.9067	0.143067
20	tas_mrsos	2004	1031	0.000679855	8.07503e-16	0	1	14.1436	0.143179
21	tas_mrsos	2004	1032	0.00132464	9.60663e-16	1	1	15.2706	0.143056
22	tas_mrsos	2004	1033	0.00135315	8.87262e-16	1	1	16.45	0.14315
23	tas_mrsos	2004	1034	0.00103347	8.32979e-16	1	1	17.6409	0.143026
24	tas_mrsos	2004	1035	0.00160358	8.64941e-16	1	1	18.7532	0.142982
25	tas_mrsos	2004	1036	0.00161996	7.85572e-16	1	1	19.9667	0.142989
26	tas_mrsos	2004	1037	0.00154634	7.76941e-16	1	1	21.1369	0.142933
27	tas_mrsos	2004	1038	0.00153674	6.06121e-16	1	1	22.2907	0.143022
28	tas_mrsos	2004	1039	0.00112877	4.77289e-16	1	1	23.4995	0.142976
29	tas_mrsos	2004	1040	0.000916593	4.28657e-16	1	1	24.6181	0.142878
30	tas_mrsos	2004	1041	0.000924683	3.56616e-16	1	0	25.7342	0.143053
31	tas_mrsos	2004	1042	0.000529836	2.3097e-16	0	0	26.9371	0.142901
32	tas_mrsos	2004	1043	0.000228592	1.25073e-16	0	0	28.1411	0.143025
33	tas_mrsos	2004	1044	0.00038788	2.3632e-16	0	0	29.1894	0.14307
34	tas_mrsos	2004	1045	0.000304173	2.74244e-16	0	0	30.3804	0.143186
35	tas_mrsos	2004	1046	0.000248679	3.18558e-16	0	0	31.6647	0.143044
36	tas_mrsos	2004	1047	0.000141257	2.86303e-16	0	0	32.6814	0.143093
37	tas_mrsos	2004	1048	5.43891e-05	1.45057e-16	0	0	33.9424	0.142939
38	tas_mrsos	2004	1049	2.58055e-05	2.13723e-16	0	0	34.9636	0.143273
39	tas_mrsos	2004	1050	-4.83627e-06	-7.12509e-17	0	0	36.4667	0.142667
40	tas_mrsos	2004	1051	-9.3169e-06	-4.29925e-16	0	0	37.5	0.143
41	tas_mrsos	2004	1087	-7.98667e-08	-2.55906e-17	0	0	-14.6	0.146
42	tas_mrsos	2004	1090	-1.76601e-07	-4.47272e-18	0	0	-10.875	0.146
43	tas_mrsos	2004	1091	-1.49196e-07	-3.87393e-18	0	0	-9.75	0.1465
44	tas_mrsos	2004	1092	-1.94031e-07	-1.01073e-17	0	0	-8.85	0.1475
45	tas_mrsos	2004	1093	9.7456e-07	9.25197e-17	0	0	-8	0.146
46	tas_mrsos	2004	1094	9.42573e-07	9.25197e-17	0	0	-6.6	0.148
47	tas_mrsos	2004	1095	2.15543e-06	1.07928e-16	0	0	-5.3	0.147
48	tas_mrsos	2004	1096	8.31334e-07	9.25197e-17	0	0	-4.4	0.147
49	tas_mrsos	2004	1097	4.5676e-06	1.14001e-16	0	0	-2.85	0.14575
50	tas_mrsos	2004	1098	2.53815e-06	5.54018e-17	0	0	-1.72	0.1466
51	tas_mrsos	2004	1099	7.39198e-06	1.89736e-16	0	0	-0.375	0.1475
52	tas_mrsos	2004	1100	1.39814e-05	1.09321e-16	0	0	0.707143	0.146786
53	tas_mrsos	2004	1101	3.52838e-05	3.92188e-16	0	1	1.78889	0.146778
54	tas_mrsos	2004	1102	2.53132e-05	2.39352e-16	0	0	3.08182	0.146455
55	tas_mrsos	2004	1103	7.82522e-05	3.95935e-16	0	1	4.095	0.14655
56	tas_mrsos	2004	1104	0.000168278	4.56504e-16	0	1	5.43514	0.146324
57	tas_mrsos	2004	1105	0.000169868	5.35753e-16	0	1	6.44839	0.146452
58	tas_mrsos	2004	1106	0.000319301	5.58905e-16	0	1	7.71111	0.146778
59	tas_mrsos	2004	1107	0.000462533	6.00181e-16	0	1	8.8	0.146528
60	tas_mrsos	2004	1108	0.000524517	6.06924e-16	0	1	10.0363	0.1467
61	tas_mrsos	2004	1109	0.000692671	6.91129e-16	0	1	11.1462	0.146677
62	tas_mrsos	2004	111	-7.98667e-08	-2.55906e-17	0	0	-19.1	0.105
63	tas_mrsos	2004	1110	0.000803831	8.41543e-16	0	1	12.4022	0.1467
64	tas_mrsos	2004	1111	0.000851425	7.75181e-16	1	1	13.4777	0.146621
65	tas_mrsos	2004	1112	0.000982097	9.00873e-16	1	1	14.7098	0.14652
66	tas_mrsos	2004	1113	0.00145893	1.07161e-15	1	1	15.852	0.146496
67	tas_mrsos	2004	1114	0.00130684	8.8329e-16	1	1	17.0316	0.146441
68	tas_mrsos	2004	1115	0.00141708	9.84366e-16	1	1	18.1985	0.146444
69	tas_mrsos	2004	1116	0.00148383	8.6522e-16	1	1	19.3484	0.146561
70	tas_mrsos	2004	1117	0.00140995	8.33858e-16	1	1	20.5071	0.146468
71	tas_mrsos	2004	1118	0.00147886	7.05359e-16	1	1	21.6717	0.146644
72	tas_mrsos	2004	1119	0.00114077	4.85044e-16	1	1	22.8584	0.146665
73	tas_mrsos	2004	112	-7.98667e-08	-2.55906e-17	0	0	-18.3	0.104
74	tas_mrsos	2004	1120	0.00123412	5.44561e-16	1	1	24.0303	0.146438
75	tas_mrsos	2004	1121	0.000853068	4.0344e-16	1	1	25.1741	0.146535
76	tas_mrsos	2004	1122	0.000591077	2.38061e-16	0	0	26.344	0.146468
77	tas_mrsos	2004	1123	0.000506269	2.80028e-16	0	0	27.4758	0.14649
78	tas_mrsos	2004	1124	0.000433357	2.90512e-16	0	0	28.6618	0.14642
79	tas_mrsos	2004	1125	0.000222125	1.65511e-16	0	0	29.8319	0.14656
80	tas_mrsos	2004	1126	0.000315505	3.25567e-16	0	0	31.0345	0.146381
81	tas_mrsos	2004	1127	0.000235493	4.86153e-16	0	1	32.0619	0.146548
82	tas_mrsos	2004	1128	0.000115799	4.13463e-16	0	1	33.404	0.14612
83	tas_mrsos	2004	1129	3.85595e-05	2.01173e-16	0	0	34.4294	0.146235
84	tas_mrsos	2004	1130	-8.55428e-06	-5.53853e-17	0	0	35.4857	0.146857
85	tas_mrsos	2004	1131	-8.48545e-07	-1.08061e-17	0	0	36.7429	0.146429
86	tas_mrsos	2004	1132	-3.67056e-06	-1.6853e-16	0	0	37.95	0.1465
87	tas_mrsos	2004	114	-7.98667e-08	-2.55906e-17	0	0	-15.8	0.103
88	tas_mrsos	2004	116	-7.98667e-08	-2.55906e-17	0	0	-13.7	0.104
89	tas_mrsos	2004	1170	-7.98667e-08	-2.55906e-17	0	0	-13	0.152
90	tas_mrsos	2004	1171	3.5948e-08	3.93701e-18	0	0	-11.4	0.152
91	tas_mrsos	2004	1173	-1.8996e-07	-6.74603e-18	0	0	-8.96667	0.151
92	tas_mrsos	2004	1174	4.01095e-08	3.93701e-18	0	0	-8.3	0.15
93	tas_mrsos	2004	1175	1.73743e-06	9.25197e-17	0	0	-6.75	0.149
94	tas_mrsos	2004	1176	3.0392e-06	6.36329e-17	0	0	-5.58	0.1502
95	tas_mrsos	2004	1177	9.42573e-07	9.25197e-17	0	0	-4.2	0.151
96	tas_mrsos	2004	1178	6.7781e-06	2.18925e-16	0	0	-3.23333	0.15
97	tas_mrsos	2004	1179	2.69891e-06	4.19091e-17	0	0	-1.97143	0.150429
98	tas_mrsos	2004	1180	5.28125e-06	7.11004e-17	0	0	-0.9875	0.149875
99	tas_mrsos	2004	1181	1.80692e-05	2.52566e-16	0	0	-0.05	0.151
100	tas_mrsos	2004	1182	1.02322e-05	9.58706e-17	0	0	1.19167	0.150333
101	tas_mrsos	2004	1183	6.17505e-05	2.54996e-16	0	0	2.448	0.15016
102	tas_mrsos	2004	1184	8.03217e-05	4.54713e-16	0	1	3.53889	0.150333
103	tas_mrsos	2004	1185	8.89158e-05	3.40788e-16	0	0	4.78077	0.150538
104	tas_mrsos	2004	1186	0.000244771	5.89454e-16	0	1	5.915	0.15
105	tas_mrsos	2004	1187	0.000231202	4.26503e-16	0	1	7.21923	0.150058
106	tas_mrsos	2004	1188	0.000278928	5.40128e-16	0	1	8.27551	0.150388
107	tas_mrsos	2004	1189	0.000301078	6.28862e-16	0	1	9.44889	0.150156
108	tas_mrsos	2004	119	-7.98667e-08	-2.55906e-17	0	0	-9.7	0.103
109	tas_mrsos	2004	1190	0.000619803	6.36653e-16	0	1	10.6315	0.150283
110	tas_mrsos	2004	1191	0.000564151	6.13528e-16	0	1	11.7455	0.150341
111	tas_mrsos	2004	1192	0.000859652	7.59677e-16	1	1	12.9037	0.150259
112	tas_mrsos	2004	1193	0.00069713	7.53931e-16	0	1	14.0795	0.150114
113	tas_mrsos	2004	1194	0.00122002	1.04218e-15	1	1	15.2054	0.150162
114	tas_mrsos	2004	1195	0.00122452	9.56394e-16	1	1	16.4867	0.150058
115	tas_mrsos	2004	1196	0.00159775	9.40494e-16	1	1	17.6063	0.150101
116	tas_mrsos	2004	1197	0.00173951	1.09731e-15	1	1	18.7566	0.150245
117	tas_mrsos	2004	1198	0.00160517	8.78796e-16	1	1	19.9636	0.150061
118	tas_mrsos	2004	1199	0.00147335	8.15055e-16	1	1	21.1358	0.150079
119	tas_mrsos	2004	1200	0.00122242	6.13668e-16	1	1	22.2721	0.150223
120	tas_mrsos	2004	1201	0.00104502	4.67075e-16	1	1	23.4401	0.150086
121	tas_mrsos	2004	1202	0.00122836	5.12394e-16	1	1	24.5875	0.150034
122	tas_mrsos	2004	1203	0.00105241	4.24447e-16	1	1	25.7498	0.150214
123	tas_mrsos	2004	1204	0.000611384	2.80218e-16	0	0	26.9733	0.150304
124	tas_mrsos	2004	1205	0.000616906	3.13194e-16	0	0	28.0615	0.150136
125	tas_mrsos	2004	1206	0.000457975	3.04144e-16	0	0	29.2466	0.150233
126	tas_mrsos	2004	1207	0.000130012	1.17763e-16	0	0	30.3876	0.150216
127	tas_mrsos	2004	1208	0.000195518	2.89901e-16	0	0	31.74	0.150033
128	tas_mrsos	2004	1209	0.000291075	5.71264e-16	0	1	32.68	0.149711
129	tas_mrsos	2004	1210	7.59819e-05	3.25526e-16	0	0	33.9143	0.149952
130	tas_mrsos	2004	1211	3.08605e-05	2.1196e-16	0	0	35.2154	0.149923
131	tas_mrsos	2004	1212	5.14311e-06	4.6382e-17	0	0	36.21	0.15
132	tas_mrsos	2004	1213	-3.27242e-06	-1.45768e-16	0	0	37.1	0.15
133	tas_mrsos	2004	124	1.21901e-06	8.85692e-17	0	0	-4.1	0.104
134	tas_mrsos	2004	1248	-7.98667e-08	-2.55906e-17	0	0	-15.6	0.153
135	tas_mrsos	2004	1251	3.91403e-08	3.93701e-18	0	0	-11.8	0.153
136	tas_mrsos	2004	1252	-2.15272e-07	-1.08268e-17	0	0	-10.85	0.153
137	tas_mrsos	2004	1253	-2.57602e-07	-2.55906e-17	0	0	-10.4	0.155
138	tas_mrsos	2004	1254	2.08875e-07	3.65829e-18	0	0	-8.71667	0.153667
139	tas_mrsos	2004	1255	3.53412e-07	9.25604e-18	0	0	-7.5	0.1535
140	tas_mrsos	2004	1256	6.78261e-07	3.48522e-17	0	0	-6.35	0.154
141	tas_mrsos	2004	1257	1.45862e-06	5.27875e-17	0	0	-5.06667	0.153667
142	tas_mrsos	2004	1258	6.6537e-07	2.39245e-17	0	0	-4.16667	0.152667
143	tas_mrsos	2004	1259	4.17958e-06	1.04827e-16	0	0	-3	0.154
144	tas_mrsos	2004	1260	-1.1528e-07	-3.32068e-18	0	0	-1.725	0.1525
145	tas_mrsos	2004	1261	8.95592e-06	3.15179e-16	0	0	-0.533333	0.154333
146	tas_mrsos	2004	1262	4.39063e-05	2.43656e-16	0	0	0.652632	0.153947
147	tas_mrsos	2004	1263	4.38119e-05	3.0531e-16	0	0	1.78667	0.154267
148	tas_mrsos	2004	1264	2.11831e-05	2.05282e-16	0	0	2.79091	0.154091
149	tas_mrsos	2004	1265	4.96204e-05	2.51187e-16	0	0	4.13	0.15375
150	tas_mrsos	2004	1266	0.000138718	3.99254e-16	0	1	5.35455	0.153788
151	tas_mrsos	2004	1267	0.000228514	5.2104e-16	0	1	6.50244	0.153659
152	tas_mrsos	2004	1268	0.000300041	5.01145e-16	0	1	7.73158	0.153702
153	tas_mrsos	2004	1269	0.000342765	5.47361e-16	0	1	8.91864	0.153763
154	tas_mrsos	2004	1270	0.000398586	6.38504e-16	0	1	9.99153	0.153542
155	tas_mrsos	2004	1271	0.000554922	6.15672e-16	0	1	11.2294	0.153906
156	tas_mrsos	2004	1272	0.000513208	7.10407e-16	0	1	12.2912	0.15375
157	tas_mrsos	2004	1273	0.00107242	8.55858e-16	1	1	13.5154	0.153726
158	tas_mrsos	2004	1274	0.00106811	8.93927e-16	1	1	14.691	0.15373
159	tas_mrsos	2004	1275	0.00130639	1.02179e-15	1	1	15.8267	0.153842
160	tas_mrsos	2004	1276	0.00145433	1.00382e-15	1	1	17.0127	0.153627
161	tas_mrsos	2004	1277	0.00162866	9.6708e-16	1	1	18.1386	0.153861
162	tas_mrsos	2004	1278	0.00171052	9.91026e-16	1	1	19.3378	0.153769
163	tas_mrsos	2004	1279	0.00124411	7.97162e-16	1	1	20.478	0.153582
164	tas_mrsos	2004	128	2.60883e-06	1.22643e-16	0	0	0.7	0.103
165	tas_mrsos	2004	1280	0.00150247	8.07503e-16	1	1	21.6345	0.153714
166	tas_mrsos	2004	1281	0.00114513	5.53206e-16	1	1	22.8716	0.153749
167	tas_mrsos	2004	1282	0.00130722	5.84097e-16	1	1	24.0051	0.153646
168	tas_mrsos	2004	1283	0.000856208	3.94761e-16	1	1	25.2094	0.153613
169	tas_mrsos	2004	1284	0.00102307	3.96914e-16	1	1	26.3527	0.153545
170	tas_mrsos	2004	1285	0.000499277	2.3723e-16	0	0	27.5146	0.153751
171	tas_mrsos	2004	1286	0.000437213	2.90179e-16	0	0	28.6854	0.153662
172	tas_mrsos	2004	1287	0.00019612	1.42431e-16	0	0	29.7633	0.153725
173	tas_mrsos	2004	1288	0.000171721	2.58569e-16	0	0	31.0186	0.153915
174	tas_mrsos	2004	1289	6.82602e-05	1.30491e-16	0	0	32.2089	0.153578
175	tas_mrsos	2004	129	1.11407e-05	2.10024e-16	0	0	1.8	0.1036
176	tas_mrsos	2004	1290	7.25379e-05	2.51496e-16	0	0	33.3385	0.153692
177	tas_mrsos	2004	1291	2.05842e-07	1.26046e-18	0	0	34.4067	0.154067
178	tas_mrsos	2004	1292	2.46551e-05	1.74512e-16	0	0	35.6846	0.153923
179	tas_mrsos	2004	1293	-5.02991e-06	-8.97534e-17	0	0	36.9	0.1534
180	tas_mrsos	2004	130	1.44894e-05	2.98178e-16	0	0	3.4	0.1044
181	tas_mrsos	2004	131	2.0763e-05	1.98061e-16	0	0	4.08	0.1038
182	tas_mrsos	2004	132	4.17704e-05	2.06363e-16	0	0	5.33	0.1039
183	tas_mrsos	2004	133	6.1593e-05	2.82195e-16	0	0	6.54286	0.10381
184	tas_mrsos	2004	1332	3.91403e-08	3.93701e-18	0	0	-12.8	0.158
185	tas_mrsos	2004	1334	-2.60712e-07	-2.55906e-17	0	0	-10.6	0.159
186	tas_mrsos	2004	1335	3.70585e-08	3.93701e-18	0	0	-8.9	0.157
187	tas_mrsos	2004	1336	7.04182e-07	2.3734e-17	0	0	-8.03333	0.157
188	tas_mrsos	2004	1337	3.91661e-06	4.95153e-17	0	0	-6.95	0.157625
189	tas_mrsos	2004	1338	6.0634e-07	2.18156e-17	0	0	-6.03333	0.157333
190	tas_mrsos	2004	1339	4.96527e-06	7.43083e-17	0	0	-4.54286	0.156571
191	tas_mrsos	2004	134	9.10062e-05	2.83439e-16	0	0	7.70968	0.103484
192	tas_mrsos	2004	1340	2.8548e-06	5.83916e-17	0	0	-3.56	0.1582
193	tas_mrsos	2004	1341	1.57102e-06	4.26991e-17	0	0	-2.4	0.158
194	tas_mrsos	2004	1342	2.04107e-05	2.29599e-16	0	0	-1.03333	0.156556
195	tas_mrsos	2004	1343	1.92588e-05	1.32938e-16	0	0	0.06875	0.157312
196	tas_mrsos	2004	1344	5.29721e-05	2.92852e-16	0	0	1.25556	0.157333
197	tas_mrsos	2004	1345	5.90731e-05	3.57043e-16	0	0	2.36875	0.157688
198	tas_mrsos	2004	1346	3.85726e-05	2.1887e-16	0	0	3.45556	0.156889
199	tas_mrsos	2004	1347	9.95647e-05	3.3555e-16	0	0	4.9069	0.15731
200	tas_mrsos	2004	1348	0.00018023	4.59418e-16	0	1	5.90789	0.157158
201	tas_mrsos	2004	1349	0.000286094	5.47498e-16	0	1	7.012	0.15728
202	tas_mrsos	2004	135	0.000151881	3.01765e-16	0	0	8.81875	0.103583
203	tas_mrsos	2004	1350	0.00033539	5.66251e-16	0	1	8.31579	0.157421
204	tas_mrsos	2004	1351	0.000401554	5.97227e-16	0	1	9.43906	0.157328
205	tas_mrsos	2004	1352	0.000602384	7.81337e-16	0	1	10.5573	0.157453
206	tas_mrsos	2004	1353	0.000679145	7.73312e-16	0	1	11.7267	0.157558
207	tas_mrsos	2004	1354	0.000862917	7.57395e-16	1	1	12.9138	0.157211
208	tas_mrsos	2004	1355	0.00103938	9.28571e-16	1	1	14.0962	0.157236
209	tas_mrsos	2004	1356	0.00139746	1.22744e-15	1	1	15.286	0.157364
210	tas_mrsos	2004	1357	0.00168619	1.27206e-15	1	1	16.4752	0.1574
211	tas_mrsos	2004	1358	0.00160998	1.03229e-15	1	1	17.6383	0.157396
212	tas_mrsos	2004	1359	0.00164006	1.12885e-15	1	1	18.7714	0.157278
213	tas_mrsos	2004	136	0.000236818	3.4298e-16	0	0	10.0108	0.103785
214	tas_mrsos	2004	1360	0.00165165	9.55538e-16	1	1	19.9325	0.157331
215	tas_mrsos	2004	1361	0.00154599	8.06444e-16	1	1	21.0879	0.15727
216	tas_mrsos	2004	1362	0.00136696	7.40297e-16	1	1	22.2352	0.157333
217	tas_mrsos	2004	1363	0.0013096	5.92519e-16	1	1	23.4609	0.157365
218	tas_mrsos	2004	1364	0.000858628	4.23482e-16	1	1	24.6364	0.157176
219	tas_mrsos	2004	1365	0.000919631	3.89419e-16	1	1	25.8034	0.157371
220	tas_mrsos	2004	1366	0.000870111	4.05623e-16	1	1	26.9171	0.15746
221	tas_mrsos	2004	1367	0.000239363	1.63668e-16	0	0	28.1215	0.157231
222	tas_mrsos	2004	1368	0.000537105	3.72226e-16	0	0	29.236	0.157576
223	tas_mrsos	2004	1369	0.000360054	3.896e-16	0	1	30.4074	0.157444
224	tas_mrsos	2004	137	0.000313627	3.78566e-16	0	0	11.1709	0.103557
225	tas_mrsos	2004	1370	0.000222071	3.87271e-16	0	1	31.622	0.15718
226	tas_mrsos	2004	1371	0.000168202	4.15027e-16	0	1	32.8222	0.157111
227	tas_mrsos	2004	1372	4.7816e-05	1.80746e-16	0	0	33.8958	0.157292
228	tas_mrsos	2004	1373	7.56974e-05	2.51114e-16	0	0	35.1571	0.157036
229	tas_mrsos	2004	1374	-1.77607e-06	-1.11218e-17	0	0	36.1667	0.157067
230	tas_mrsos	2004	1375	-4.12505e-06	-9.20422e-17	0	0	37.375	0.1575
231	tas_mrsos	2004	138	0.000328183	3.17739e-16	0	0	12.3776	0.103561
232	tas_mrsos	2004	139	0.000364321	3.53034e-16	0	0	13.4959	0.103806
233	tas_mrsos	2004	140	0.000400568	3.7696e-16	0	0	14.6707	0.103606
234	tas_mrsos	2004	1404	-7.98667e-08	-2.55906e-17	0	0	-23	0.16
235	tas_mrsos	2004	141	0.000281724	3.10462e-16	0	0	15.8847	0.103565
236	tas_mrsos	2004	1412	-3.34279e-07	-2.55906e-17	0	0	-13.2	0.1605
237	tas_mrsos	2004	1413	7.20148e-07	3.51717e-17	0	0	-11.9	0.1615
238	tas_mrsos	2004	1414	-2.15272e-07	-1.08268e-17	0	0	-10.9	0.163
239	tas_mrsos	2004	1415	-2.57602e-07	-2.55906e-17	0	0	-10.3	0.162
240	tas_mrsos	2004	1416	-4.34996e-07	-1.07393e-17	0	0	-8.8	0.16125
241	tas_mrsos	2004	1417	3.46274e-07	1.88151e-17	0	0	-7.25	0.1615
242	tas_mrsos	2004	1418	2.85693e-06	7.25573e-17	0	0	-6.15	0.161
243	tas_mrsos	2004	1419	1.20659e-06	6.36306e-17	0	0	-5	0.16
244	tas_mrsos	2004	142	0.00041222	3.1355e-16	0	0	17.0231	0.10381
245	tas_mrsos	2004	1420	1.6188e-06	4.24721e-17	0	0	-4.1	0.16075
246	tas_mrsos	2004	1421	4.35188e-06	9.10709e-17	0	0	-3	0.1606
247	tas_mrsos	2004	1423	5.80055e-06	1.05069e-16	0	0	-0.633333	0.161167
248	tas_mrsos	2004	1424	1.35938e-05	2.26344e-16	0	0	0.816667	0.1605
249	tas_mrsos	2004	1425	3.97322e-05	2.62472e-16	0	0	1.90667	0.160933
250	tas_mrsos	2004	1426	6.17477e-05	2.73482e-16	0	0	2.97826	0.160565
251	tas_mrsos	2004	1427	9.50155e-05	4.2231e-16	0	1	4.14091	0.161455
252	tas_mrsos	2004	1428	0.000303726	4.88764e-16	0	1	5.39492	0.161102
253	tas_mrsos	2004	1429	0.000293898	5.07148e-16	0	1	6.5	0.160982
254	tas_mrsos	2004	143	0.000307063	2.16033e-16	0	0	18.1771	0.103634
255	tas_mrsos	2004	1430	0.000364399	4.9761e-16	0	1	7.71268	0.16093
256	tas_mrsos	2004	1431	0.000451966	6.29892e-16	0	1	8.87	0.161143
257	tas_mrsos	2004	1432	0.000517805	6.77635e-16	0	1	10.0176	0.160851
258	tas_mrsos	2004	1433	0.00083974	7.54365e-16	1	1	11.1736	0.160981
259	tas_mrsos	2004	1434	0.000702153	7.67646e-16	0	1	12.391	0.16091
260	tas_mrsos	2004	1435	0.000776948	9.0762e-16	0	1	13.5098	0.160768
261	tas_mrsos	2004	1436	0.00093721	1.05668e-15	1	1	14.6548	0.161
262	tas_mrsos	2004	1437	0.0016317	1.24168e-15	1	1	15.8935	0.160878
263	tas_mrsos	2004	1438	0.00111049	9.6293e-16	1	1	17.0211	0.161092
264	tas_mrsos	2004	1439	0.00161536	1.24699e-15	1	1	18.1802	0.160736
265	tas_mrsos	2004	144	0.000362631	2.00206e-16	0	0	19.3848	0.103659
266	tas_mrsos	2004	1440	0.00182717	1.12383e-15	1	1	19.3718	0.160933
267	tas_mrsos	2004	1441	0.00156204	9.14862e-16	1	1	20.4955	0.160865
268	tas_mrsos	2004	1442	0.00157349	8.22916e-16	1	1	21.6724	0.161092
269	tas_mrsos	2004	1443	0.000974371	4.99785e-16	1	1	22.8798	0.160965
270	tas_mrsos	2004	1444	0.00133045	5.61859e-16	1	1	24.0725	0.161029
271	tas_mrsos	2004	1445	0.000953751	3.88102e-16	1	1	25.2158	0.160893
272	tas_mrsos	2004	1446	0.000917878	4.08679e-16	1	1	26.3761	0.160848
273	tas_mrsos	2004	1447	0.000713867	3.41327e-16	0	0	27.5186	0.160907
274	tas_mrsos	2004	1448	0.000601075	3.52437e-16	0	0	28.6987	0.160967
275	tas_mrsos	2004	1449	0.000310184	2.15242e-16	0	0	29.8024	0.161
276	tas_mrsos	2004	145	0.000428959	1.73038e-16	0	0	20.525	0.103415
277	tas_mrsos	2004	1450	0.000198039	3.24588e-16	0	0	30.9453	0.161038
278	tas_mrsos	2004	1451	0.000142827	3.78185e-16	0	0	32.1853	0.161147
279	tas_mrsos	2004	1452	0.000106222	2.93806e-16	0	0	33.3094	0.161062
280	tas_mrsos	2004	1453	4.65798e-05	3.89589e-16	0	1	34.4818	0.160818
281	tas_mrsos	2004	1454	3.42034e-06	2.25585e-17	0	0	35.6143	0.160571
282	tas_mrsos	2004	1455	4.64792e-06	4.17323e-16	0	1	36.7	0.16
283	tas_mrsos	2004	1456	-1.21448e-05	-3.69986e-16	0	0	37.7333	0.161333
284	tas_mrsos	2004	146	0.000435222	1.27512e-16	0	0	21.702	0.103444
285	tas_mrsos	2004	147	0.000334715	7.39609e-17	0	0	22.8722	0.103516
286	tas_mrsos	2004	148	0.000493714	9.05055e-17	0	0	24.0178	0.103564
287	tas_mrsos	2004	149	0.000559513	1.24233e-16	0	0	25.1818	0.103636
288	tas_mrsos	2004	1491	-7.98667e-08	-2.55906e-17	0	0	-15.9	0.166
289	tas_mrsos	2004	1492	-2.37308e-07	-2.55906e-17	0	0	-15.3	0.164
290	tas_mrsos	2004	1495	-2.33662e-07	-2.55906e-17	0	0	-11.4	0.163
291	tas_mrsos	2004	1496	5.47181e-07	6.29921e-17	0	0	-10	0.165
292	tas_mrsos	2004	1497	7.43023e-07	1.89552e-17	0	0	-9.325	0.165
293	tas_mrsos	2004	1498	-3.81902e-07	-7.97517e-18	0	0	-8.14	0.1646
294	tas_mrsos	2004	1499	1.68285e-06	4.19942e-17	0	0	-6.975	0.16475
295	tas_mrsos	2004	150	0.000139926	2.6646e-17	0	0	26.3807	0.103516
296	tas_mrsos	2004	1500	3.97093e-06	5.8341e-17	0	0	-5.61429	0.164857
297	tas_mrsos	2004	1501	8.594e-06	1.77705e-16	0	0	-4.48571	0.165286
298	tas_mrsos	2004	1502	1.94865e-06	5.06492e-17	0	0	-3.7	0.16525
299	tas_mrsos	2004	1503	7.41054e-08	3.93701e-18	0	0	-2.45	0.165
300	tas_mrsos	2004	1504	1.05839e-05	3.53368e-16	0	0	-1	0.165333
301	tas_mrsos	2004	1505	2.00366e-05	2.15544e-16	0	0	0.06	0.1641
302	tas_mrsos	2004	1506	1.92462e-05	1.26777e-16	0	0	1.1375	0.1645
303	tas_mrsos	2004	1507	3.65142e-05	3.04228e-16	0	0	2.35833	0.164167
304	tas_mrsos	2004	1508	5.98556e-05	3.18425e-16	0	0	3.71053	0.164474
305	tas_mrsos	2004	1509	0.000133832	3.54411e-16	0	0	4.80278	0.164222
306	tas_mrsos	2004	151	-0.000504954	-8.09525e-17	0	0	27.5521	0.103591
307	tas_mrsos	2004	1510	0.000181861	4.06231e-16	0	1	5.83488	0.164047
308	tas_mrsos	2004	1511	0.000325812	5.3845e-16	0	1	7.14655	0.164224
309	tas_mrsos	2004	1512	0.000291993	5.17712e-16	0	1	8.28909	0.164673
310	tas_mrsos	2004	1513	0.000512915	5.87597e-16	0	1	9.43765	0.164365
311	tas_mrsos	2004	1514	0.000577336	7.01346e-16	0	1	10.5538	0.164425
312	tas_mrsos	2004	1515	0.000733034	7.34309e-16	0	1	11.7896	0.164354
313	tas_mrsos	2004	1516	0.0010947	9.38462e-16	1	1	12.9426	0.164478
314	tas_mrsos	2004	1517	0.00095333	1.03816e-15	1	1	14.1466	0.164398
315	tas_mrsos	2004	1518	0.0010437	1.1043e-15	1	1	15.2663	0.164382
316	tas_mrsos	2004	1519	0.00152135	1.16322e-15	1	1	16.4618	0.164626
317	tas_mrsos	2004	152	-0.000388658	-7.15578e-17	0	0	28.6903	0.103559
318	tas_mrsos	2004	1520	0.00134372	1.00409e-15	1	1	17.6119	0.164286
319	tas_mrsos	2004	1521	0.00149073	1.17548e-15	1	1	18.7448	0.16444
320	tas_mrsos	2004	1522	0.00189384	1.06536e-15	1	1	19.9534	0.164503
321	tas_mrsos	2004	1523	0.00123428	7.65293e-16	1	1	21.0986	0.164592
322	tas_mrsos	2004	1524	0.0014105	7.62617e-16	1	1	22.2725	0.164599
323	tas_mrsos	2004	1525	0.00108152	5.73474e-16	1	1	23.4304	0.164667
324	tas_mrsos	2004	1526	0.00120374	6.18441e-16	1	1	24.6035	0.16455
325	tas_mrsos	2004	1527	0.00115393	4.89338e-16	1	1	25.7478	0.164566
326	tas_mrsos	2004	1528	0.000688803	3.76927e-16	0	0	26.9747	0.164544
327	tas_mrsos	2004	1529	0.000728255	3.74133e-16	0	0	28.1012	0.164453
328	tas_mrsos	2004	153	-0.00064519	-1.11394e-16	0	0	29.8691	0.103529
329	tas_mrsos	2004	1530	0.000606319	3.34563e-16	0	0	29.3258	0.164365
330	tas_mrsos	2004	1531	0.000251761	2.26396e-16	0	0	30.4122	0.164429
331	tas_mrsos	2004	1532	0.000250565	6.39502e-16	0	1	31.5676	0.164882
332	tas_mrsos	2004	1533	0.000110129	2.81838e-16	0	0	32.8171	0.164486
333	tas_mrsos	2004	1534	1.63746e-05	8.41787e-17	0	0	33.8722	0.164333
334	tas_mrsos	2004	1535	2.17738e-05	1.95844e-16	0	0	35.12	0.1646
335	tas_mrsos	2004	1536	1.24381e-05	1.11266e-16	0	0	36.3	0.1644
336	tas_mrsos	2004	154	-0.000834812	-1.50315e-16	0	0	31.0002	0.103554
337	tas_mrsos	2004	155	-0.000973797	-2.17196e-16	0	0	32.1643	0.103457
338	tas_mrsos	2004	156	-0.000814327	-2.59852e-16	0	0	33.2927	0.103296
339	tas_mrsos	2004	1563	-1.59733e-07	-2.55906e-17	0	0	-26.25	0.169
340	tas_mrsos	2004	1564	-7.98667e-08	-2.55906e-17	0	0	-24.9	0.17
341	tas_mrsos	2004	1569	-1.59733e-07	-2.55906e-17	0	0	-19.1	0.168
342	tas_mrsos	2004	157	-0.000575054	-2.62516e-16	0	0	34.4466	0.103456
343	tas_mrsos	2004	1570	-7.98667e-08	-2.55906e-17	0	0	-18.6	0.167
344	tas_mrsos	2004	1574	-2.50311e-07	-7.95915e-18	0	0	-13.45	0.16725
345	tas_mrsos	2004	1575	-2.57602e-07	-2.55906e-17	0	0	-11.7	0.167
346	tas_mrsos	2004	1576	-2.37308e-07	-2.55906e-17	0	0	-11.3	0.169
347	tas_mrsos	2004	1577	-5.67941e-07	-2.55906e-17	0	0	-9.56667	0.168
348	tas_mrsos	2004	1578	6.56827e-07	1.78638e-17	0	0	-8.6	0.1685
349	tas_mrsos	2004	1579	3.40931e-07	3.34646e-17	0	0	-7	0.169
350	tas_mrsos	2004	158	-0.000221262	-2.60046e-16	0	0	35.6421	0.103447
351	tas_mrsos	2004	1580	4.46975e-07	1.51239e-17	0	0	-6.36667	0.169667
352	tas_mrsos	2004	1581	1.0621e-06	2.83704e-17	0	0	-5.325	0.16825
353	tas_mrsos	2004	1582	2.57536e-06	2.69685e-16	0	0	-4.4	0.167
354	tas_mrsos	2004	1583	2.94979e-06	4.31642e-17	0	0	-3.0375	0.16825
355	tas_mrsos	2004	1584	2.59839e-06	4.07728e-17	0	0	-1.67143	0.168
356	tas_mrsos	2004	1585	1.97171e-05	1.80148e-16	0	0	-0.590909	0.168091
357	tas_mrsos	2004	1586	1.71051e-05	1.15061e-16	0	0	0.59375	0.167875
358	tas_mrsos	2004	1587	6.4167e-05	5.06476e-16	0	1	1.89231	0.168231
359	tas_mrsos	2004	1588	5.65815e-05	2.93696e-16	0	0	2.96842	0.167842
360	tas_mrsos	2004	1589	8.59667e-05	3.13833e-16	0	0	4.08889	0.168111
361	tas_mrsos	2004	159	-3.10477e-05	-5.52775e-17	0	0	36.8471	0.103667
362	tas_mrsos	2004	1590	0.000130095	3.5509e-16	0	0	5.31944	0.167944
363	tas_mrsos	2004	1591	0.00016551	3.90922e-16	0	1	6.50952	0.167952
364	tas_mrsos	2004	1592	0.000331711	6.05945e-16	0	1	7.67736	0.168113
365	tas_mrsos	2004	1593	0.000440988	5.34101e-16	0	1	8.85375	0.1679
366	tas_mrsos	2004	1594	0.000461763	5.88555e-16	0	1	10.0461	0.168079
367	tas_mrsos	2004	1595	0.000820823	7.79814e-16	0	1	11.1911	0.168149
368	tas_mrsos	2004	1596	0.000731586	8.65097e-16	0	1	12.35	0.168024
369	tas_mrsos	2004	1597	0.00101298	9.49236e-16	1	1	13.4981	0.167874
370	tas_mrsos	2004	1598	0.00166067	1.30635e-15	1	1	14.6636	0.168091
371	tas_mrsos	2004	1599	0.00159691	1.29793e-15	1	1	15.86	0.167783
372	tas_mrsos	2004	160	-4.22752e-05	-2.01859e-16	0	0	38.1105	0.103684
373	tas_mrsos	2004	1600	0.00136887	1.06974e-15	1	1	16.97	0.168242
374	tas_mrsos	2004	1601	0.00143229	1.04144e-15	1	1	18.2093	0.16814
375	tas_mrsos	2004	1602	0.00143959	9.24008e-16	1	1	19.3713	0.168287
376	tas_mrsos	2004	1603	0.00154863	9.51828e-16	1	1	20.4664	0.16804
377	tas_mrsos	2004	1604	0.00180011	8.37533e-16	1	1	21.6464	0.168179
378	tas_mrsos	2004	1605	0.0013109	6.56459e-16	1	1	22.838	0.168117
379	tas_mrsos	2004	1606	0.00124833	5.35009e-16	1	1	24.0569	0.168074
380	tas_mrsos	2004	1607	0.00115478	5.82408e-16	1	1	25.1913	0.16811
381	tas_mrsos	2004	1608	0.00079381	3.99758e-16	0	1	26.3254	0.168035
382	tas_mrsos	2004	1609	0.000706771	3.97633e-16	0	1	27.5409	0.168013
383	tas_mrsos	2004	161	-7.71809e-06	-3.64474e-16	0	0	39.25	0.103
384	tas_mrsos	2004	1610	0.000762588	5.67476e-16	0	1	28.6583	0.167942
385	tas_mrsos	2004	1611	0.000327935	2.29441e-16	0	0	29.8234	0.167875
386	tas_mrsos	2004	1612	0.000223063	3.97637e-16	0	1	30.996	0.16818
387	tas_mrsos	2004	1613	0.000227526	4.56957e-16	0	1	32.1159	0.16825
388	tas_mrsos	2004	1614	0.000118686	5.1305e-16	0	1	33.32	0.1683
389	tas_mrsos	2004	1615	-7.72611e-06	-1.12969e-16	0	0	34.4667	0.168
390	tas_mrsos	2004	1616	1.59009e-05	1.78274e-16	0	0	35.75	0.16825
391	tas_mrsos	2004	1617	-2.54401e-07	-5.73355e-18	0	0	36.825	0.1685
392	tas_mrsos	2004	1633	-7.98667e-08	-2.55906e-17	0	0	-39.1	0.171
393	tas_mrsos	2004	1642	-7.98667e-08	-2.55906e-17	0	0	-29.3	0.172
394	tas_mrsos	2004	1646	-7.98667e-08	-2.55906e-17	0	0	-24.8	0.173
395	tas_mrsos	2004	1656	-1.96604e-07	-1.06022e-17	0	0	-12.45	0.172
396	tas_mrsos	2004	1657	3.98869e-07	1.94687e-17	0	0	-11.85	0.1725
397	tas_mrsos	2004	1658	1.09436e-06	6.29921e-17	0	0	-10.7	0.1715
398	tas_mrsos	2004	1659	1.52174e-06	7.91747e-17	0	0	-9.15	0.171
399	tas_mrsos	2004	1660	1.99905e-06	4.15897e-17	0	0	-8.22	0.1714
400	tas_mrsos	2004	1661	1.54017e-06	1.99309e-17	0	0	-7.0625	0.171875
401	tas_mrsos	2004	1662	4.05757e-08	3.93701e-18	0	0	-5.5	0.172
402	tas_mrsos	2004	1663	1.03989e-06	3.50741e-17	0	0	-4.8	0.172
403	tas_mrsos	2004	1664	3.54946e-07	1.91501e-17	0	0	-3	0.1705
404	tas_mrsos	2004	1665	4.2743e-06	8.52215e-17	0	0	-2.28	0.1712
405	tas_mrsos	2004	1666	7.46933e-06	8.22359e-17	0	0	-1.23333	0.171778
406	tas_mrsos	2004	1667	1.8824e-05	1.36883e-16	0	0	0.0933333	0.1722
407	tas_mrsos	2004	1668	1.28717e-05	1.69658e-16	0	0	1.45	0.17175
408	tas_mrsos	2004	1669	7.05473e-05	4.63691e-16	0	1	2.29333	0.172067
409	tas_mrsos	2004	1670	6.899e-05	3.32947e-16	0	0	3.60476	0.171381
410	tas_mrsos	2004	1671	0.000103684	3.72478e-16	0	0	4.73214	0.171536
411	tas_mrsos	2004	1672	0.000201135	4.48295e-16	0	1	5.97045	0.171636
412	tas_mrsos	2004	1673	0.000298318	4.79342e-16	0	1	7.18833	0.17205
413	tas_mrsos	2004	1674	0.000416618	5.5296e-16	0	1	8.26301	0.171589
414	tas_mrsos	2004	1675	0.00050733	5.55234e-16	0	1	9.42857	0.171813
415	tas_mrsos	2004	1676	0.000604923	6.50183e-16	0	1	10.5923	0.171681
416	tas_mrsos	2004	1677	0.000607786	6.30494e-16	0	1	11.7394	0.171426
417	tas_mrsos	2004	1678	0.000816341	8.23003e-16	0	1	12.9469	0.171865
418	tas_mrsos	2004	1679	0.00111787	9.95337e-16	1	1	14.1477	0.171486
419	tas_mrsos	2004	1680	0.00157002	1.38386e-15	1	1	15.2798	0.171578
420	tas_mrsos	2004	1681	0.00151299	1.23494e-15	1	1	16.4913	0.171861
421	tas_mrsos	2004	1682	0.00195038	1.1951e-15	1	1	17.613	0.171695
422	tas_mrsos	2004	1683	0.00186558	1.27064e-15	1	1	18.7825	0.171613
423	tas_mrsos	2004	1684	0.00152074	9.30988e-16	1	1	19.9675	0.171503
424	tas_mrsos	2004	1685	0.00178432	1.03276e-15	1	1	21.1472	0.171679
425	tas_mrsos	2004	1686	0.00140756	7.56651e-16	1	1	22.2855	0.171482
426	tas_mrsos	2004	1687	0.00125724	6.12798e-16	1	1	23.4674	0.171641
427	tas_mrsos	2004	1688	0.00111085	6.17854e-16	1	1	24.6348	0.171728
428	tas_mrsos	2004	1689	0.0010629	5.26483e-16	1	1	25.7213	0.171736
429	tas_mrsos	2004	1690	0.000874198	5.24056e-16	1	1	26.9336	0.171521
430	tas_mrsos	2004	1691	0.000826611	4.98528e-16	1	1	28.1169	0.171858
431	tas_mrsos	2004	1692	0.000379317	2.6266e-16	0	0	29.2244	0.171638
432	tas_mrsos	2004	1693	0.00028191	3.38855e-16	0	0	30.4568	0.171703
433	tas_mrsos	2004	1694	0.000250122	4.65108e-16	0	1	31.6625	0.171563
434	tas_mrsos	2004	1695	7.96158e-05	2.23832e-16	0	0	32.8094	0.1715
435	tas_mrsos	2004	1696	2.93069e-05	2.02615e-16	0	0	33.9154	0.171846
436	tas_mrsos	2004	1697	3.32649e-06	4.90035e-17	0	0	35.0833	0.172
437	tas_mrsos	2004	1698	-4.43277e-06	-5.71397e-17	0	0	36.3857	0.171857
438	tas_mrsos	2004	1699	3.0507e-06	2.69685e-16	0	0	37	0.172
439	tas_mrsos	2004	1736	1.13214e-07	3.81306e-18	0	0	-13.3333	0.175667
440	tas_mrsos	2004	1738	-2.15272e-07	-1.08268e-17	0	0	-10.7	0.1765
441	tas_mrsos	2004	1739	3.47928e-08	3.93701e-18	0	0	-10.3	0.174
442	tas_mrsos	2004	1740	-7.59813e-07	-2.55906e-17	0	0	-8.76667	0.174667
443	tas_mrsos	2004	1741	1.6288e-06	4.17035e-17	0	0	-7.4	0.17475
444	tas_mrsos	2004	1742	4.84581e-06	4.89104e-17	0	0	-6.4	0.1753
445	tas_mrsos	2004	1743	3.89688e-06	3.04487e-17	0	0	-5.36154	0.175846
446	tas_mrsos	2004	1744	4.2808e-06	5.79083e-17	0	0	-4.175	0.17525
447	tas_mrsos	2004	1745	1.37389e-06	2.82417e-17	0	0	-2.88	0.1746
448	tas_mrsos	2004	1746	2.69346e-06	2.59885e-17	0	0	-1.75455	0.175273
449	tas_mrsos	2004	1747	8.09295e-06	1.06151e-16	0	0	-0.5125	0.17525
450	tas_mrsos	2004	1748	2.57796e-05	1.47649e-16	0	0	0.615789	0.174895
451	tas_mrsos	2004	1749	3.05705e-05	2.42049e-16	0	0	1.78462	0.175923
452	tas_mrsos	2004	1750	4.39987e-05	2.4113e-16	0	0	2.92222	0.175111
453	tas_mrsos	2004	1751	8.10736e-05	2.96696e-16	0	0	4.22222	0.175148
454	tas_mrsos	2004	1752	0.000182436	4.41383e-16	0	1	5.3439	0.175415
455	tas_mrsos	2004	1753	0.000212514	4.90204e-16	0	1	6.63095	0.1755
456	tas_mrsos	2004	1754	0.000293105	4.74748e-16	0	1	7.64167	0.175167
457	tas_mrsos	2004	1755	0.000459489	5.99435e-16	0	1	8.92632	0.175434
458	tas_mrsos	2004	1756	0.000683771	7.43916e-16	0	1	10.0191	0.17536
459	tas_mrsos	2004	1757	0.000605398	7.10445e-16	0	1	11.1963	0.175402
460	tas_mrsos	2004	1758	0.00110322	1.06799e-15	1	1	12.3	0.17511
461	tas_mrsos	2004	1759	0.00113323	1.12566e-15	1	1	13.5265	0.175163
462	tas_mrsos	2004	176	-7.98667e-08	-2.55906e-17	0	0	-38.5	0.109
463	tas_mrsos	2004	1760	0.00118258	1.13103e-15	1	1	14.69	0.17533
464	tas_mrsos	2004	1761	0.00148562	1.19916e-15	1	1	15.844	0.175276
465	tas_mrsos	2004	1762	0.00153045	1.2585e-15	1	1	16.9623	0.175123
466	tas_mrsos	2004	1763	0.00179706	1.17027e-15	1	1	18.2257	0.175257
467	tas_mrsos	2004	1764	0.00178774	1.01014e-15	1	1	19.3488	0.175139
468	tas_mrsos	2004	1765	0.00132288	9.21898e-16	1	1	20.5231	0.175299
469	tas_mrsos	2004	1766	0.00168483	9.33228e-16	1	1	21.7256	0.175396
470	tas_mrsos	2004	1767	0.00156367	7.13464e-16	1	1	22.8735	0.17524
471	tas_mrsos	2004	1768	0.00107585	5.08028e-16	1	1	24.0875	0.175179
472	tas_mrsos	2004	1769	0.00128096	5.47966e-16	1	1	25.1928	0.17538
473	tas_mrsos	2004	1770	0.00104696	4.7063e-16	1	1	26.3365	0.175178
474	tas_mrsos	2004	1771	0.000624482	4.26779e-16	0	1	27.518	0.174992
475	tas_mrsos	2004	1772	0.000568959	3.46392e-16	0	0	28.7007	0.175469
476	tas_mrsos	2004	1773	0.000329994	2.87775e-16	0	0	29.8779	0.175154
477	tas_mrsos	2004	1774	0.000245578	3.73156e-16	0	0	31.0246	0.175164
478	tas_mrsos	2004	1775	0.000151728	3.84588e-16	0	1	32.1265	0.175412
479	tas_mrsos	2004	1776	0.000103333	3.96124e-16	0	1	33.3696	0.175478
480	tas_mrsos	2004	1777	2.98362e-05	1.62753e-16	0	0	34.55	0.175125
481	tas_mrsos	2004	1778	1.70293e-05	1.38882e-16	0	0	35.5455	0.175273
482	tas_mrsos	2004	1779	5.75188e-06	2.55202e-16	0	0	36.75	0.176
483	tas_mrsos	2004	1817	-2.08659e-07	-1.06324e-17	0	0	-13.8	0.179
484	tas_mrsos	2004	1818	6.62754e-07	3.44917e-17	0	0	-12.9	0.178
485	tas_mrsos	2004	1819	6.18202e-07	6.29921e-17	0	0	-11.1	0.179
486	tas_mrsos	2004	1820	-5.15124e-07	-2.55906e-17	0	0	-10.05	0.1785
487	tas_mrsos	2004	1821	-3.0981e-07	-2.55906e-17	0	0	-9.15	0.18
488	tas_mrsos	2004	1822	2.99102e-06	4.29219e-17	0	0	-8	0.178571
489	tas_mrsos	2004	1823	3.9428e-06	4.945e-17	0	0	-6.725	0.17925
490	tas_mrsos	2004	1824	1.92842e-06	2.46912e-17	0	0	-5.7	0.17875
491	tas_mrsos	2004	1825	9.25641e-06	9.48862e-17	0	0	-4.48	0.1787
492	tas_mrsos	2004	1826	2.00789e-06	3.54657e-17	0	0	-3.41667	0.179
493	tas_mrsos	2004	1827	5.78212e-06	1.40922e-16	0	0	-2.4	0.1784
494	tas_mrsos	2004	1828	1.38597e-05	1.47678e-16	0	0	-1.14	0.179
495	tas_mrsos	2004	1829	1.94556e-05	1.73017e-16	0	0	0.0666667	0.179417
496	tas_mrsos	2004	1830	2.82225e-05	2.48776e-16	0	0	1.16923	0.179385
497	tas_mrsos	2004	1831	5.23279e-05	2.18128e-16	0	0	2.424	0.179
498	tas_mrsos	2004	1832	7.80096e-05	2.95065e-16	0	0	3.54074	0.178852
499	tas_mrsos	2004	1833	9.61608e-05	3.6735e-16	0	0	4.81154	0.179
500	tas_mrsos	2004	1834	0.00016268	3.57438e-16	0	0	5.92222	0.178867
501	tas_mrsos	2004	1835	0.000259602	4.25023e-16	0	1	7.05424	0.178797
502	tas_mrsos	2004	1836	0.000397211	5.40188e-16	0	1	8.27778	0.178583
503	tas_mrsos	2004	1837	0.000483533	5.91139e-16	0	1	9.39136	0.178728
504	tas_mrsos	2004	1838	0.000399173	7.52909e-16	0	1	10.5365	0.178962
505	tas_mrsos	2004	1839	0.000810112	8.52898e-16	0	1	11.7663	0.178826
506	tas_mrsos	2004	1840	0.00105614	1.00503e-15	1	1	12.9524	0.179
507	tas_mrsos	2004	1841	0.00108705	1.1195e-15	1	1	14.1152	0.178707
508	tas_mrsos	2004	1842	0.00141025	1.2339e-15	1	1	15.2889	0.178963
509	tas_mrsos	2004	1843	0.00170055	1.28577e-15	1	1	16.4512	0.17904
510	tas_mrsos	2004	1844	0.00156623	1.14446e-15	1	1	17.6287	0.178946
511	tas_mrsos	2004	1845	0.00209202	1.20682e-15	1	1	18.8	0.178728
512	tas_mrsos	2004	1846	0.00188788	1.10735e-15	1	1	19.9177	0.178715
513	tas_mrsos	2004	1847	0.00167668	9.65071e-16	1	1	21.0559	0.178969
514	tas_mrsos	2004	1848	0.00161069	8.07253e-16	1	1	22.2678	0.178825
515	tas_mrsos	2004	1849	0.00138786	6.61057e-16	1	1	23.4706	0.17884
516	tas_mrsos	2004	1850	0.0013765	7.04079e-16	1	1	24.5566	0.178775
517	tas_mrsos	2004	1851	0.00131677	5.73914e-16	1	1	25.791	0.17896
518	tas_mrsos	2004	1852	0.000918191	4.79883e-16	1	1	26.9065	0.178917
519	tas_mrsos	2004	1853	0.000454945	3.0526e-16	0	0	28.0649	0.178687
520	tas_mrsos	2004	1854	0.000499261	3.86492e-16	0	1	29.2217	0.178765
521	tas_mrsos	2004	1855	0.00049968	5.13821e-16	0	1	30.3818	0.178648
522	tas_mrsos	2004	1856	0.000273381	6.06599e-16	0	1	31.58	0.17855
523	tas_mrsos	2004	1857	3.35337e-05	1.29639e-16	0	0	32.8478	0.17887
524	tas_mrsos	2004	1858	0.000119979	5.51117e-16	0	1	33.9	0.178947
525	tas_mrsos	2004	1859	2.2468e-06	1.78113e-17	0	0	35.1818	0.178909
526	tas_mrsos	2004	186	-7.98667e-08	-2.55906e-17	0	0	-26.4	0.107
527	tas_mrsos	2004	1860	-3.66129e-06	-6.57816e-17	0	0	36.14	0.179
528	tas_mrsos	2004	1861	-4.22921e-06	-1.89109e-16	0	0	37.3	0.18
529	tas_mrsos	2004	187	-7.98667e-08	-2.55906e-17	0	0	-25.9	0.106
530	tas_mrsos	2004	188	-7.98667e-08	-2.55906e-17	0	0	-25	0.108
531	tas_mrsos	2004	1896	-2.47799e-07	-2.55906e-17	0	0	-15.5	0.183
532	tas_mrsos	2004	1897	-2.16289e-07	-1.10212e-17	0	0	-14.55	0.1815
533	tas_mrsos	2004	1898	7.37311e-07	1.88522e-17	0	0	-13.325	0.18275
534	tas_mrsos	2004	1899	3.53759e-08	3.93701e-18	0	0	-12.1	0.181
535	tas_mrsos	2004	1901	4.82879e-07	1.02171e-17	0	0	-10.02	0.1818
536	tas_mrsos	2004	1902	4.46331e-07	1.12246e-17	0	0	-8.55	0.1825
537	tas_mrsos	2004	1903	5.26183e-06	8.77076e-17	0	0	-7.31667	0.1825
538	tas_mrsos	2004	1904	3.87929e-06	1.00577e-16	0	0	-6.225	0.182
539	tas_mrsos	2004	1905	2.68362e-06	3.11038e-17	0	0	-4.98889	0.182444
540	tas_mrsos	2004	1906	9.35804e-06	8.84189e-17	0	0	-4.11818	0.182455
541	tas_mrsos	2004	1907	6.30087e-06	6.39082e-17	0	0	-2.79	0.1827
542	tas_mrsos	2004	1908	8.44756e-06	8.87492e-17	0	0	-1.55	0.1827
543	tas_mrsos	2004	1909	1.6403e-05	1.33507e-16	0	0	-0.607692	0.182692
544	tas_mrsos	2004	1910	8.92067e-06	9.55666e-17	0	0	0.52	0.1819
545	tas_mrsos	2004	1911	1.28273e-05	1.18385e-16	0	0	1.7	0.182083
546	tas_mrsos	2004	1912	7.80682e-05	2.77528e-16	0	0	2.99286	0.182607
547	tas_mrsos	2004	1913	0.000144595	4.59078e-16	0	1	4.10323	0.182516
548	tas_mrsos	2004	1914	0.00015669	3.14734e-16	0	0	5.30204	0.182694
549	tas_mrsos	2004	1915	0.000194441	4.04264e-16	0	1	6.53404	0.182383
550	tas_mrsos	2004	1916	0.000369973	4.87576e-16	0	1	7.58514	0.182419
551	tas_mrsos	2004	1917	0.000421818	5.41501e-16	0	1	8.84605	0.182579
552	tas_mrsos	2004	1918	0.000695553	8.09738e-16	0	1	10.0212	0.182353
553	tas_mrsos	2004	1919	0.000623154	8.20629e-16	0	1	11.1653	0.18244
554	tas_mrsos	2004	1920	0.000743651	9.76742e-16	0	1	12.316	0.182587
555	tas_mrsos	2004	1921	0.000996654	1.05886e-15	1	1	13.52	0.182144
556	tas_mrsos	2004	1922	0.00109248	1.03641e-15	1	1	14.605	0.18247
557	tas_mrsos	2004	1923	0.00171121	1.29187e-15	1	1	15.854	0.182516
558	tas_mrsos	2004	1924	0.00200601	1.32098e-15	1	1	17.0056	0.18238
559	tas_mrsos	2004	1925	0.00139328	1.02742e-15	1	1	18.1543	0.182472
560	tas_mrsos	2004	1926	0.00196826	1.18689e-15	1	1	19.3452	0.182368
561	tas_mrsos	2004	1927	0.00228021	1.18252e-15	1	1	20.5239	0.182439
562	tas_mrsos	2004	1928	0.00192018	9.7861e-16	1	1	21.6456	0.182356
563	tas_mrsos	2004	1929	0.00151844	7.5164e-16	1	1	22.8478	0.182335
564	tas_mrsos	2004	1930	0.001287	6.3566e-16	1	1	24.0444	0.182478
565	tas_mrsos	2004	1931	0.00130363	6.49385e-16	1	1	25.1807	0.182568
566	tas_mrsos	2004	1932	0.000945894	5.00782e-16	1	1	26.3648	0.182473
567	tas_mrsos	2004	1933	0.00104734	5.62809e-16	1	1	27.5926	0.182515
568	tas_mrsos	2004	1934	0.00100279	7.31728e-16	1	1	28.668	0.182426
569	tas_mrsos	2004	1935	0.000689999	5.11775e-16	0	1	29.8176	0.182395
570	tas_mrsos	2004	1936	0.000186797	3.57302e-16	0	0	30.9915	0.182298
571	tas_mrsos	2004	1937	5.66123e-05	2.5508e-16	0	0	32.2263	0.182421
572	tas_mrsos	2004	1938	2.58725e-05	9.79112e-17	0	0	33.3	0.182174
573	tas_mrsos	2004	1939	1.84488e-05	1.03387e-16	0	0	34.5438	0.182625
574	tas_mrsos	2004	1940	5.49466e-06	7.02928e-17	0	0	35.9429	0.182571
575	tas_mrsos	2004	1941	2.07734e-06	9.25197e-17	0	0	36.55	0.1825
576	tas_mrsos	2004	1942	4.34846e-08	3.93701e-18	0	0	37.8	0.182
577	tas_mrsos	2004	1976	-2.4088e-07	-2.55906e-17	0	0	-17.2	0.187
578	tas_mrsos	2004	1977	-4.95599e-07	-2.55906e-17	0	0	-16.05	0.186
579	tas_mrsos	2004	1978	-7.98667e-08	-2.55906e-17	0	0	-14.8	0.187
580	tas_mrsos	2004	1979	7.72752e-08	3.93701e-18	0	0	-13.8	0.187
581	tas_mrsos	2004	1980	-1.69596e-07	-5.7355e-18	0	0	-12.5667	0.186
582	tas_mrsos	2004	1981	-2.12507e-07	-1.08268e-17	0	0	-11.45	0.1855
583	tas_mrsos	2004	1982	-4.2864e-07	-1.09217e-17	0	0	-10.425	0.18575
584	tas_mrsos	2004	1983	7.34304e-08	3.93701e-18	0	0	-9.05	0.1865
585	tas_mrsos	2004	1984	1.28371e-06	4.45127e-17	0	0	-8.23333	0.184667
586	tas_mrsos	2004	1985	4.38674e-06	4.08171e-17	0	0	-6.97273	0.186273
587	tas_mrsos	2004	1986	5.72146e-06	4.93937e-17	0	0	-5.61667	0.185583
588	tas_mrsos	2004	1987	1.15015e-05	9.69757e-17	0	0	-4.63333	0.186583
589	tas_mrsos	2004	1988	7.74656e-06	6.52029e-17	0	0	-3.55	0.185833
590	tas_mrsos	2004	1989	6.88509e-06	1.18676e-16	0	0	-2.2	0.186167
591	tas_mrsos	2004	1990	4.9197e-06	5.78239e-17	0	0	-1.15556	0.185778
592	tas_mrsos	2004	1991	2.19949e-05	1.76207e-16	0	0	0.0769231	0.185538
593	tas_mrsos	2004	1992	5.80864e-05	2.80462e-16	0	0	1.27727	0.186091
594	tas_mrsos	2004	1993	5.99854e-05	3.07962e-16	0	0	2.29	0.18595
595	tas_mrsos	2004	1994	7.16433e-05	3.44478e-16	0	0	3.48095	0.186238
596	tas_mrsos	2004	1995	0.000157714	4.53381e-16	0	1	4.75429	0.186314
597	tas_mrsos	2004	1996	0.00015774	3.90292e-16	0	1	5.88293	0.185902
598	tas_mrsos	2004	1997	0.000252127	4.77234e-16	0	1	7.13462	0.185788
599	tas_mrsos	2004	1998	0.00056984	6.57981e-16	0	1	8.32326	0.185942
600	tas_mrsos	2004	1999	0.000650405	7.18465e-16	0	1	9.39438	0.186079
601	tas_mrsos	2004	200	3.65089e-08	3.93701e-18	0	0	-10	0.107
602	tas_mrsos	2004	2000	0.000653678	6.35312e-16	0	1	10.501	0.186059
603	tas_mrsos	2004	2001	0.000885731	9.33658e-16	1	1	11.8174	0.186
604	tas_mrsos	2004	2002	0.00117959	1.12471e-15	1	1	12.9363	0.185863
605	tas_mrsos	2004	2003	0.00140707	1.14014e-15	1	1	14.0756	0.186118
606	tas_mrsos	2004	2004	0.00156708	1.28729e-15	1	1	15.2635	0.18607
607	tas_mrsos	2004	2005	0.00147282	1.30872e-15	1	1	16.4565	0.186056
608	tas_mrsos	2004	2006	0.00184452	1.16329e-15	1	1	17.5874	0.186007
609	tas_mrsos	2004	2007	0.00183233	1.19876e-15	1	1	18.7806	0.186042
610	tas_mrsos	2004	2008	0.00189603	9.8414e-16	1	1	19.9406	0.185933
611	tas_mrsos	2004	2009	0.00160669	8.77477e-16	1	1	21.0917	0.186077
612	tas_mrsos	2004	2010	0.0017973	9.81402e-16	1	1	22.2294	0.185876
613	tas_mrsos	2004	2011	0.00155551	7.76863e-16	1	1	23.4617	0.1859
614	tas_mrsos	2004	2012	0.00111341	6.14404e-16	1	1	24.5919	0.185925
615	tas_mrsos	2004	2013	0.00136303	6.13601e-16	1	1	25.7292	0.185979
616	tas_mrsos	2004	2014	0.00113942	5.33562e-16	1	1	26.9633	0.185941
617	tas_mrsos	2004	2015	0.00106317	5.65446e-16	1	1	28.0893	0.186006
618	tas_mrsos	2004	2016	0.00077286	4.01137e-16	0	1	29.2124	0.186088
619	tas_mrsos	2004	2017	0.000396834	5.01252e-16	0	1	30.3465	0.186014
620	tas_mrsos	2004	2018	0.00037587	6.65471e-16	0	1	31.636	0.18582
621	tas_mrsos	2004	2019	3.47483e-05	1.41985e-16	0	0	32.7364	0.185773
622	tas_mrsos	2004	2020	-9.53418e-07	-5.60837e-18	0	0	34.02	0.1864
623	tas_mrsos	2004	2021	-5.08209e-06	-5.15896e-17	0	0	35.3111	0.185778
624	tas_mrsos	2004	2022	5.61559e-06	2.53383e-16	0	0	36	0.1875
625	tas_mrsos	2004	205	8.57959e-07	9.25197e-17	0	0	-4.8	0.108
626	tas_mrsos	2004	2051	-7.98667e-08	-2.55906e-17	0	0	-23.5	0.191
627	tas_mrsos	2004	2056	-2.33662e-07	-2.55906e-17	0	0	-17.9	0.188
628	tas_mrsos	2004	2057	-2.44377e-07	-2.55906e-17	0	0	-16.8	0.189
629	tas_mrsos	2004	2058	-1.73484e-07	-4.0483e-18	0	0	-15.72	0.1896
630	tas_mrsos	2004	2059	-1.75448e-07	-6.04145e-18	0	0	-14.4333	0.189333
631	tas_mrsos	2004	206	-7.98667e-08	-2.55906e-17	0	0	-3.4	0.108
632	tas_mrsos	2004	2060	-4.73437e-07	-2.55906e-17	0	0	-13.05	0.19
633	tas_mrsos	2004	2061	-2.60712e-07	-2.55906e-17	0	0	-12.5	0.19
634	tas_mrsos	2004	2062	-2.29943e-07	-2.55906e-17	0	0	-11.4	0.188
635	tas_mrsos	2004	2063	4.58408e-07	1.5681e-17	0	0	-9.66667	0.189333
636	tas_mrsos	2004	2064	4.11464e-07	1.37386e-17	0	0	-8.63333	0.189
637	tas_mrsos	2004	2065	-4.81088e-07	-2.55906e-17	0	0	-7.35	0.1905
638	tas_mrsos	2004	2066	2.65243e-06	3.17718e-17	0	0	-6.35556	0.189889
639	tas_mrsos	2004	2067	6.2597e-06	8.75347e-17	0	0	-5.1125	0.19025
640	tas_mrsos	2004	2068	9.82185e-06	1.38985e-16	0	0	-4.38571	0.188857
641	tas_mrsos	2004	2069	2.38464e-05	1.82314e-16	0	0	-2.71538	0.189846
642	tas_mrsos	2004	207	3.14684e-06	1.11285e-16	0	0	-2.16667	0.108667
643	tas_mrsos	2004	2070	1.18329e-05	8.00371e-17	0	0	-1.77333	0.189467
644	tas_mrsos	2004	2071	1.30815e-05	8.49134e-17	0	0	-0.55625	0.189375
645	tas_mrsos	2004	2072	3.43821e-05	2.1677e-16	0	0	0.75	0.189625
646	tas_mrsos	2004	2073	3.09388e-05	3.2194e-16	0	0	1.91	0.1898
647	tas_mrsos	2004	2074	4.61587e-05	2.70438e-16	0	0	2.91111	0.189611
648	tas_mrsos	2004	2075	8.57394e-05	2.48064e-16	0	0	4.22	0.189371
649	tas_mrsos	2004	2076	0.00012117	3.73688e-16	0	0	5.39687	0.189438
650	tas_mrsos	2004	2077	0.000238618	4.36774e-16	0	1	6.45455	0.189418
651	tas_mrsos	2004	2078	0.000266877	4.09335e-16	0	1	7.65156	0.18975
652	tas_mrsos	2004	2079	0.000395364	6.07989e-16	0	1	8.82462	0.189477
653	tas_mrsos	2004	208	3.98191e-06	1.31205e-16	0	0	-0.966667	0.107
654	tas_mrsos	2004	2080	0.000489672	7.49173e-16	0	1	10.0766	0.189688
655	tas_mrsos	2004	2081	0.000710653	8.46489e-16	0	1	11.1598	0.189793
656	tas_mrsos	2004	2082	0.00117703	1.06917e-15	1	1	12.3664	0.189626
657	tas_mrsos	2004	2083	0.000923182	1.08672e-15	1	1	13.5329	0.189707
658	tas_mrsos	2004	2084	0.00129616	1.21073e-15	1	1	14.6363	0.189529
659	tas_mrsos	2004	2085	0.00115119	9.44917e-16	1	1	15.8292	0.189825
660	tas_mrsos	2004	2086	0.00156043	1.20983e-15	1	1	17.0339	0.189556
661	tas_mrsos	2004	2087	0.00227108	1.43018e-15	1	1	18.1595	0.189716
662	tas_mrsos	2004	2088	0.00189242	1.10565e-15	1	1	19.3683	0.189768
663	tas_mrsos	2004	2089	0.00162296	1.06064e-15	1	1	20.5	0.189556
664	tas_mrsos	2004	209	1.44593e-06	1.09646e-16	0	0	-0.05	0.1075
665	tas_mrsos	2004	2090	0.00167001	1.0609e-15	1	1	21.6088	0.189497
666	tas_mrsos	2004	2091	0.00151124	7.30355e-16	1	1	22.8564	0.189622
667	tas_mrsos	2004	2092	0.00136443	7.02824e-16	1	1	24.0322	0.189586
668	tas_mrsos	2004	2093	0.00131106	6.79977e-16	1	1	25.1907	0.189517
669	tas_mrsos	2004	2094	0.00145024	6.65871e-16	1	1	26.3332	0.189694
670	tas_mrsos	2004	2095	0.00117684	5.41505e-16	1	1	27.5516	0.189464
671	tas_mrsos	2004	2096	0.000850457	5.60261e-16	1	1	28.6806	0.189724
672	tas_mrsos	2004	2097	0.000698115	6.60592e-16	0	1	29.7151	0.189699
673	tas_mrsos	2004	2098	0.000284357	5.79326e-16	0	1	30.9558	0.189558
674	tas_mrsos	2004	2099	0.00019199	6.8447e-16	0	1	32.0583	0.189667
675	tas_mrsos	2004	210	6.87613e-06	3.2874e-16	0	0	1.4	0.106
676	tas_mrsos	2004	2100	7.38058e-05	2.4225e-16	0	0	33.3444	0.18963
677	tas_mrsos	2004	2101	1.92374e-05	1.40124e-16	0	0	34.5083	0.189667
678	tas_mrsos	2004	2102	-2.32238e-06	-2.96852e-17	0	0	35.5571	0.189429
679	tas_mrsos	2004	2103	-1.31419e-05	-2.38285e-16	0	0	36.72	0.1908
680	tas_mrsos	2004	211	1.78508e-05	1.46988e-16	0	0	2.42308	0.107385
681	tas_mrsos	2004	212	3.98123e-05	1.94378e-16	0	0	3.53333	0.10719
682	tas_mrsos	2004	213	5.13658e-05	2.27447e-16	0	0	4.7087	0.107087
683	tas_mrsos	2004	2138	-2.4088e-07	-2.55906e-17	0	0	-17.2	0.195
684	tas_mrsos	2004	214	9.81112e-05	3.15937e-16	0	0	5.91613	0.107194
685	tas_mrsos	2004	2140	-2.07319e-07	-1.09332e-17	0	0	-14.7	0.193
686	tas_mrsos	2004	2141	-9.74209e-08	-1.95556e-18	0	0	-13.88	0.1938
687	tas_mrsos	2004	2142	2.63735e-07	5.35348e-18	0	0	-13.12	0.1924
688	tas_mrsos	2004	2143	-1.82934e-07	-6.10932e-18	0	0	-11.9333	0.192333
689	tas_mrsos	2004	2144	4.358e-07	8.97767e-18	0	0	-10.3	0.1922
690	tas_mrsos	2004	2145	-4.54717e-07	-1.53306e-17	0	0	-9.23333	0.192333
691	tas_mrsos	2004	2146	1.0639e-06	2.1985e-17	0	0	-8.04	0.1918
692	tas_mrsos	2004	2147	2.83915e-06	4.72991e-17	0	0	-6.81429	0.193857
693	tas_mrsos	2004	2148	6.46738e-06	6.07164e-17	0	0	-5.8	0.192818
694	tas_mrsos	2004	2149	5.46365e-06	4.18889e-17	0	0	-4.63077	0.192692
695	tas_mrsos	2004	215	7.19945e-05	2.51532e-16	0	0	7.07143	0.107321
696	tas_mrsos	2004	2150	2.29121e-05	1.75269e-16	0	0	-3.46429	0.193286
697	tas_mrsos	2004	2151	1.55038e-05	1.31468e-16	0	0	-2.29167	0.193417
698	tas_mrsos	2004	2152	1.28915e-05	9.99728e-17	0	0	-1.19286	0.193286
699	tas_mrsos	2004	2153	1.9831e-05	1.16619e-16	0	0	0.177778	0.192444
700	tas_mrsos	2004	2154	6.72657e-05	3.03313e-16	0	0	1.28261	0.193174
701	tas_mrsos	2004	2155	5.58428e-05	2.18664e-16	0	0	2.33846	0.193154
702	tas_mrsos	2004	2156	0.000100443	3.25867e-16	0	0	3.52258	0.193355
703	tas_mrsos	2004	2157	0.000123252	2.84694e-16	0	0	4.77674	0.193442
704	tas_mrsos	2004	2158	0.000226032	3.62412e-16	0	0	5.92097	0.193145
705	tas_mrsos	2004	2159	0.000289951	4.91875e-16	0	1	7.03103	0.193172
706	tas_mrsos	2004	216	0.000191943	3.31007e-16	0	0	8.29821	0.107268
707	tas_mrsos	2004	2160	0.000455064	6.19983e-16	0	1	8.32703	0.193541
708	tas_mrsos	2004	2161	0.000588745	7.82547e-16	0	1	9.42162	0.193135
709	tas_mrsos	2004	2162	0.000626598	7.00702e-16	0	1	10.5625	0.193307
710	tas_mrsos	2004	2163	0.000849907	9.30945e-16	1	1	11.7753	0.192978
711	tas_mrsos	2004	2164	0.00138921	1.0905e-15	1	1	12.9295	0.193139
712	tas_mrsos	2004	2165	0.00151608	1.30123e-15	1	1	14.1286	0.193027
713	tas_mrsos	2004	2166	0.00152685	1.19399e-15	1	1	15.2504	0.193089
714	tas_mrsos	2004	2167	0.0019686	1.35859e-15	1	1	16.4436	0.193143
715	tas_mrsos	2004	2168	0.00189557	1.22865e-15	1	1	17.6204	0.193041
716	tas_mrsos	2004	2169	0.0021526	1.20295e-15	1	1	18.7477	0.193305
717	tas_mrsos	2004	217	0.000160174	3.73416e-16	0	0	9.4125	0.107075
718	tas_mrsos	2004	2170	0.00162263	1.11115e-15	1	1	19.9357	0.193028
719	tas_mrsos	2004	2171	0.00168368	9.66237e-16	1	1	21.1244	0.193116
720	tas_mrsos	2004	2172	0.0016703	8.51803e-16	1	1	22.2592	0.193307
721	tas_mrsos	2004	2173	0.00198067	8.44884e-16	1	1	23.467	0.193264
722	tas_mrsos	2004	2174	0.00144412	6.70376e-16	1	1	24.6031	0.193082
723	tas_mrsos	2004	2175	0.000994321	5.45485e-16	1	1	25.7549	0.193179
724	tas_mrsos	2004	2176	0.0011054	6.13504e-16	1	1	26.9555	0.193122
725	tas_mrsos	2004	2177	0.00127868	7.23805e-16	1	1	28.1026	0.193282
726	tas_mrsos	2004	2178	0.000627953	4.85208e-16	0	1	29.2522	0.193296
727	tas_mrsos	2004	2179	0.000254228	3.37903e-16	0	0	30.3806	0.193179
728	tas_mrsos	2004	218	0.000182663	3.17033e-16	0	0	10.5545	0.106982
729	tas_mrsos	2004	2180	0.000276142	6.00964e-16	0	1	31.5825	0.19345
730	tas_mrsos	2004	2181	6.20709e-05	2.11313e-16	0	0	32.7962	0.193538
731	tas_mrsos	2004	2182	2.62052e-05	1.57722e-16	0	0	33.78	0.1932
732	tas_mrsos	2004	2183	3.08999e-05	2.11766e-16	0	0	34.9308	0.192923
733	tas_mrsos	2004	2184	7.519e-06	7.51946e-17	0	0	36.1111	0.193444
734	tas_mrsos	2004	2185	1.79753e-06	8.04006e-17	0	0	36.95	0.1925
735	tas_mrsos	2004	219	0.00028473	3.16121e-16	0	0	11.7753	0.107047
736	tas_mrsos	2004	220	0.000397276	3.61492e-16	0	0	12.9291	0.107155
737	tas_mrsos	2004	221	0.000483845	3.90527e-16	0	1	14.1409	0.106983
738	tas_mrsos	2004	2219	-2.37308e-07	-2.55906e-17	0	0	-17.4	0.196
739	tas_mrsos	2004	222	0.000542474	3.42276e-16	0	0	15.2653	0.10728
740	tas_mrsos	2004	2220	-4.74321e-07	-2.55906e-17	0	0	-16.2	0.197
741	tas_mrsos	2004	2221	-3.95659e-07	-1.03424e-17	0	0	-14.65	0.197
742	tas_mrsos	2004	2222	-5.05557e-07	-2.55906e-17	0	0	-13.2	0.1955
743	tas_mrsos	2004	2223	-3.84918e-07	-7.85342e-18	0	0	-12.18	0.1974
744	tas_mrsos	2004	2224	6.31058e-07	3.30465e-17	0	0	-11.15	0.1985
745	tas_mrsos	2004	2225	1.01843e-06	2.01389e-17	0	0	-9.95	0.196333
746	tas_mrsos	2004	2226	3.63638e-06	3.38365e-17	0	0	-8.80909	0.197182
747	tas_mrsos	2004	2227	3.76274e-06	6.10697e-17	0	0	-7.64286	0.197571
748	tas_mrsos	2004	2228	7.79426e-07	1.03171e-17	0	0	-6.375	0.1965
749	tas_mrsos	2004	2229	8.97404e-06	8.49619e-17	0	0	-5.16364	0.196636
750	tas_mrsos	2004	223	0.000700838	3.82424e-16	0	1	16.4924	0.107294
751	tas_mrsos	2004	2230	1.44331e-05	1.06701e-16	0	0	-4.06429	0.196714
752	tas_mrsos	2004	2231	1.34645e-05	2.3293e-16	0	0	-2.71667	0.197
753	tas_mrsos	2004	2232	6.84257e-06	5.14871e-17	0	0	-1.68571	0.196714
754	tas_mrsos	2004	2233	2.42973e-05	1.17434e-16	0	0	-0.490909	0.1965
755	tas_mrsos	2004	2234	6.98904e-05	3.61872e-16	0	0	0.57	0.19675
756	tas_mrsos	2004	2235	6.11598e-05	3.06811e-16	0	0	1.85	0.19685
757	tas_mrsos	2004	2236	9.31986e-05	3.58536e-16	0	0	2.88846	0.196769
758	tas_mrsos	2004	2237	0.000107873	2.89616e-16	0	0	4.20263	0.196684
759	tas_mrsos	2004	2238	0.000207367	3.7513e-16	0	0	5.43019	0.196623
760	tas_mrsos	2004	2239	0.000320596	4.21054e-16	0	1	6.50667	0.196733
761	tas_mrsos	2004	224	0.000655731	3.48806e-16	0	0	17.5867	0.107127
762	tas_mrsos	2004	2240	0.000552668	6.17815e-16	0	1	7.61667	0.196711
763	tas_mrsos	2004	2241	0.000497246	6.30646e-16	0	1	8.86883	0.196857
764	tas_mrsos	2004	2242	0.000842591	8.56135e-16	1	1	9.99062	0.19674
765	tas_mrsos	2004	2243	0.00101622	9.56295e-16	1	1	11.1712	0.196731
766	tas_mrsos	2004	2244	0.00110358	1.09631e-15	1	1	12.3184	0.196806
767	tas_mrsos	2004	2245	0.00101861	1.03786e-15	1	1	13.52	0.196716
768	tas_mrsos	2004	2246	0.00147429	1.14312e-15	1	1	14.7352	0.196808
769	tas_mrsos	2004	2247	0.00137067	1.0793e-15	1	1	15.875	0.196758
770	tas_mrsos	2004	2248	0.00156646	1.20814e-15	1	1	16.9904	0.196752
771	tas_mrsos	2004	2249	0.00221416	1.42451e-15	1	1	18.1864	0.196769
772	tas_mrsos	2004	225	0.000661298	2.92627e-16	0	0	18.7707	0.107098
773	tas_mrsos	2004	2250	0.00213073	1.28103e-15	1	1	19.3911	0.19693
774	tas_mrsos	2004	2251	0.00161206	1.11878e-15	1	1	20.4927	0.196657
775	tas_mrsos	2004	2252	0.00180957	9.4945e-16	1	1	21.6776	0.196753
776	tas_mrsos	2004	2253	0.00150428	7.53623e-16	1	1	22.8617	0.196689
777	tas_mrsos	2004	2254	0.0016366	7.343e-16	1	1	24.0158	0.196744
778	tas_mrsos	2004	2255	0.00142331	6.50177e-16	1	1	25.1735	0.19673
779	tas_mrsos	2004	2256	0.001077	6.2503e-16	1	1	26.3737	0.196822
780	tas_mrsos	2004	2257	0.0013163	7.07824e-16	1	1	27.4988	0.196677
781	tas_mrsos	2004	2258	0.00121404	7.0781e-16	1	1	28.6967	0.19677
782	tas_mrsos	2004	2259	0.000532698	4.71005e-16	0	1	29.792	0.19667
783	tas_mrsos	2004	226	0.000767593	2.96959e-16	0	0	19.9718	0.107145
784	tas_mrsos	2004	2260	0.00047302	7.43641e-16	0	1	31.0339	0.196696
785	tas_mrsos	2004	2261	7.62285e-05	2.64373e-16	0	0	32.2192	0.196654
786	tas_mrsos	2004	2262	4.19002e-05	2.03468e-16	0	0	33.4	0.197333
787	tas_mrsos	2004	2263	5.88451e-06	3.23537e-17	0	0	34.375	0.196875
788	tas_mrsos	2004	2264	5.0653e-06	9.19187e-17	0	0	35.44	0.1978
789	tas_mrsos	2004	2265	-1.30738e-05	-5.97829e-16	0	0	36.7	0.197
790	tas_mrsos	2004	227	0.000995976	3.07993e-16	1	0	21.1413	0.107133
791	tas_mrsos	2004	228	0.00115758	2.5943e-16	1	0	22.2916	0.107277
792	tas_mrsos	2004	229	0.00147859	2.41457e-16	1	0	23.4428	0.107188
793	tas_mrsos	2004	230	0.00117315	2.16505e-16	1	0	24.5941	0.107094
794	tas_mrsos	2004	2301	-4.05947e-07	-1.49317e-17	0	0	-16.5	0.201333
795	tas_mrsos	2004	2302	-4.60306e-07	-1.57041e-17	0	0	-15.0667	0.199667
796	tas_mrsos	2004	2303	-5.37426e-07	-6.9107e-18	0	0	-13.975	0.200625
797	tas_mrsos	2004	2304	-4.84356e-07	-2.55906e-17	0	0	-13	0.201
798	tas_mrsos	2004	2305	-6.60812e-07	-1.77894e-17	0	0	-11.775	0.19975
799	tas_mrsos	2004	2306	-4.01303e-07	-1.05132e-17	0	0	-10.45	0.2
800	tas_mrsos	2004	2307	3.5446e-07	1.76171e-17	0	0	-9.4	0.201
801	tas_mrsos	2004	2308	1.8314e-07	3.88714e-18	0	0	-8.12	0.2008
802	tas_mrsos	2004	2309	1.07832e-06	1.89178e-17	0	0	-7.15	0.200667
803	tas_mrsos	2004	231	0.000757196	1.38761e-16	0	0	25.7573	0.107127
804	tas_mrsos	2004	2310	8.65671e-06	8.00391e-17	0	0	-5.66364	0.200455
805	tas_mrsos	2004	2311	9.18619e-06	1.04096e-16	0	0	-4.7	0.200444
806	tas_mrsos	2004	2312	1.51243e-05	1.50589e-16	0	0	-3.28	0.2
807	tas_mrsos	2004	2313	2.97189e-05	2.68612e-16	0	0	-2.22727	0.200182
808	tas_mrsos	2004	2314	1.91962e-05	9.8644e-17	0	0	-1.15	0.2001
809	tas_mrsos	2004	2315	2.46125e-05	1.32153e-16	0	0	0.15	0.2008
810	tas_mrsos	2004	2316	5.3249e-05	2.17364e-16	0	0	1.21923	0.200308
811	tas_mrsos	2004	2317	3.12364e-05	1.28768e-16	0	0	2.48077	0.200308
812	tas_mrsos	2004	2318	0.000115931	4.40396e-16	0	1	3.56923	0.200615
813	tas_mrsos	2004	2319	0.000125982	3.20979e-16	0	0	4.7125	0.20055
814	tas_mrsos	2004	232	0.000183547	3.17655e-17	0	0	26.9355	0.107124
815	tas_mrsos	2004	2320	0.000173299	3.95394e-16	0	1	5.85909	0.200068
816	tas_mrsos	2004	2321	0.000287888	4.84613e-16	0	1	7.09167	0.200183
817	tas_mrsos	2004	2322	0.000500195	6.72237e-16	0	1	8.25733	0.20032
818	tas_mrsos	2004	2323	0.000818732	8.42316e-16	0	1	9.41122	0.200327
819	tas_mrsos	2004	2324	0.000654796	7.44841e-16	0	1	10.5782	0.200402
820	tas_mrsos	2004	2325	0.000800334	9.00867e-16	0	1	11.7125	0.200557
821	tas_mrsos	2004	2326	0.00122538	1.09761e-15	1	1	12.8667	0.200361
822	tas_mrsos	2004	2327	0.00135609	1.164e-15	1	1	14.1292	0.200345
823	tas_mrsos	2004	2328	0.00151711	1.54341e-15	1	1	15.2234	0.200309
824	tas_mrsos	2004	2329	0.00179934	1.15e-15	1	1	16.4205	0.200424
825	tas_mrsos	2004	233	0.000213103	4.40819e-17	0	0	28.0967	0.10694
826	tas_mrsos	2004	2330	0.00229059	1.39102e-15	1	1	17.6252	0.200415
827	tas_mrsos	2004	2331	0.00234158	1.29596e-15	1	1	18.7363	0.20038
828	tas_mrsos	2004	2332	0.00203912	1.19454e-15	1	1	19.9354	0.200224
829	tas_mrsos	2004	2333	0.00205074	1.17006e-15	1	1	21.1339	0.200352
830	tas_mrsos	2004	2334	0.00203424	9.77759e-16	1	1	22.2278	0.200505
831	tas_mrsos	2004	2335	0.00178489	8.26428e-16	1	1	23.4536	0.200429
832	tas_mrsos	2004	2336	0.00172696	8.05599e-16	1	1	24.6021	0.200264
833	tas_mrsos	2004	2337	0.00188607	8.90912e-16	1	1	25.7875	0.200375
834	tas_mrsos	2004	2338	0.00108383	5.37712e-16	1	1	26.9263	0.200335
835	tas_mrsos	2004	2339	0.00076895	4.46053e-16	0	1	28.0513	0.200138
836	tas_mrsos	2004	234	-0.000468661	-1.00613e-16	0	0	29.2531	0.107091
837	tas_mrsos	2004	2340	0.000581003	5.32459e-16	0	1	29.1845	0.200381
838	tas_mrsos	2004	2341	0.000288181	4.52678e-16	0	1	30.3877	0.200228
839	tas_mrsos	2004	2342	0.00016323	4.01669e-16	0	1	31.5972	0.200361
840	tas_mrsos	2004	2343	7.92572e-05	3.27374e-16	0	0	32.8	0.20019
841	tas_mrsos	2004	2344	3.16488e-05	1.53695e-16	0	0	33.9722	0.200333
842	tas_mrsos	2004	2345	8.32149e-06	9.38337e-17	0	0	34.9	0.200375
843	tas_mrsos	2004	2346	3.07287e-06	2.69685e-16	0	0	36.3	0.202
844	tas_mrsos	2004	235	-0.000798902	-1.76959e-16	0	0	30.4618	0.107104
845	tas_mrsos	2004	236	-0.000348899	-1.0109e-16	0	0	31.6175	0.107135
846	tas_mrsos	2004	237	1.41804e-05	5.27144e-18	0	0	32.7581	0.106949
847	tas_mrsos	2004	238	-0.000208174	-1.22071e-16	0	0	33.9238	0.107
848	tas_mrsos	2004	2383	-9.65863e-07	-1.96847e-17	0	0	-14.58	0.2036
849	tas_mrsos	2004	2384	3.91403e-08	3.93701e-18	0	0	-13.6	0.205
850	tas_mrsos	2004	2385	-5.05401e-07	-2.55906e-17	0	0	-12.25	0.2045
851	tas_mrsos	2004	2386	-4.52018e-07	-1.55937e-17	0	0	-11.1667	0.204
852	tas_mrsos	2004	2387	-7.25625e-08	-1.51235e-18	0	0	-9.88	0.2036
853	tas_mrsos	2004	2388	-2.25104e-07	-1.1188e-17	0	0	-8.35	0.2045
854	tas_mrsos	2004	2389	2.2729e-06	3.56937e-17	0	0	-7.52857	0.204143
855	tas_mrsos	2004	239	-0.000186944	-1.5956e-16	0	0	35.0471	0.107288
856	tas_mrsos	2004	2390	3.14121e-06	2.99511e-17	0	0	-6.27273	0.203818
857	tas_mrsos	2004	2391	7.78786e-06	5.31531e-17	0	0	-5.1125	0.203813
858	tas_mrsos	2004	2392	1.04208e-05	6.69114e-17	0	0	-4.13125	0.204625
859	tas_mrsos	2004	2393	1.43792e-05	7.95494e-17	0	0	-3.02105	0.204158
860	tas_mrsos	2004	2394	1.97292e-05	1.03168e-16	0	0	-1.70476	0.204238
861	tas_mrsos	2004	2395	2.76055e-05	1.21956e-16	0	0	-0.486957	0.20387
862	tas_mrsos	2004	2396	3.88194e-05	1.99214e-16	0	0	0.675	0.20395
863	tas_mrsos	2004	2397	5.27604e-05	1.59634e-16	0	0	1.78529	0.203971
864	tas_mrsos	2004	2398	6.15935e-05	2.13671e-16	0	0	2.90667	0.204067
865	tas_mrsos	2004	2399	0.000119609	2.61615e-16	0	0	4.1617	0.204021
866	tas_mrsos	2004	240	-2.10159e-05	-2.83601e-17	0	0	36.2924	0.106652
867	tas_mrsos	2004	2400	0.000220864	3.6613e-16	0	0	5.3629	0.204032
868	tas_mrsos	2004	2401	0.000296	5.0022e-16	0	1	6.47167	0.203883
869	tas_mrsos	2004	2402	0.000372004	4.70673e-16	0	1	7.62911	0.203835
870	tas_mrsos	2004	2403	0.000641918	6.76863e-16	0	1	8.79474	0.203716
871	tas_mrsos	2004	2404	0.000610327	7.7187e-16	0	1	9.99114	0.204076
872	tas_mrsos	2004	2405	0.00073442	7.72341e-16	0	1	11.1543	0.204096
873	tas_mrsos	2004	2406	0.00136496	9.42454e-16	1	1	12.3838	0.203951
874	tas_mrsos	2004	2407	0.00119778	1.12784e-15	1	1	13.4725	0.203833
875	tas_mrsos	2004	2408	0.00127476	1.23969e-15	1	1	14.631	0.20392
876	tas_mrsos	2004	2409	0.00154171	1.20965e-15	1	1	15.9024	0.203919
877	tas_mrsos	2004	241	-2.76817e-06	-8.38574e-18	0	0	37.39	0.106867
878	tas_mrsos	2004	2410	0.00154993	1.15856e-15	1	1	17.0195	0.203867
879	tas_mrsos	2004	2411	0.00228617	1.40082e-15	1	1	18.1892	0.203828
880	tas_mrsos	2004	2412	0.00234902	1.2132e-15	1	1	19.3337	0.203925
881	tas_mrsos	2004	2413	0.00188501	1.21686e-15	1	1	20.5054	0.204081
882	tas_mrsos	2004	2414	0.00277047	1.15859e-15	1	1	21.7102	0.203969
883	tas_mrsos	2004	2415	0.00219671	9.49267e-16	1	1	22.8673	0.204005
884	tas_mrsos	2004	2416	0.00242432	9.18848e-16	1	1	24.0294	0.203945
885	tas_mrsos	2004	2417	0.00146027	7.02923e-16	1	1	25.2286	0.203873
886	tas_mrsos	2004	2418	0.00142917	6.12678e-16	1	1	26.3627	0.203914
887	tas_mrsos	2004	2419	0.00149901	7.53447e-16	1	1	27.5401	0.203951
888	tas_mrsos	2004	242	-2.87637e-05	-3.72684e-16	0	0	38.2714	0.107429
889	tas_mrsos	2004	2420	0.00126322	7.09111e-16	1	1	28.6987	0.203878
890	tas_mrsos	2004	2421	0.000575929	6.99695e-16	0	1	29.7384	0.204027
891	tas_mrsos	2004	2422	0.000455017	6.08862e-16	0	1	30.9954	0.203985
892	tas_mrsos	2004	2423	9.48247e-05	3.11131e-16	0	0	32.1778	0.204444
893	tas_mrsos	2004	2424	3.03207e-05	1.48795e-16	0	0	33.3944	0.203833
894	tas_mrsos	2004	2425	2.52345e-06	1.71118e-17	0	0	34.4846	0.203769
895	tas_mrsos	2004	2426	2.16772e-05	2.12237e-16	0	0	35.6444	0.203667
896	tas_mrsos	2004	2427	-5.23948e-06	-1.1871e-16	0	0	36.675	0.20475
897	tas_mrsos	2004	2428	-9.26817e-07	-8.46457e-17	0	0	37.5	0.203
898	tas_mrsos	2004	2463	-4.88074e-07	-2.55906e-17	0	0	-16.75	0.208
899	tas_mrsos	2004	2464	1.2128e-08	2.54655e-19	0	0	-15.2	0.2082
900	tas_mrsos	2004	2465	-2.57602e-07	-2.55906e-17	0	0	-14.2	0.209
901	tas_mrsos	2004	2466	-1.21928e-06	-2.55906e-17	0	0	-12.76	0.2068
902	tas_mrsos	2004	2467	1.3013e-07	3.42865e-18	0	0	-11.7	0.20675
903	tas_mrsos	2004	2468	4.20674e-06	5.32872e-17	0	0	-10.475	0.207125
904	tas_mrsos	2004	2469	-7.04684e-07	-1.81336e-17	0	0	-9.475	0.2075
905	tas_mrsos	2004	2470	-4.24358e-07	-1.10389e-17	0	0	-8.125	0.20775
906	tas_mrsos	2004	2471	4.70876e-07	9.62168e-18	0	0	-7.02	0.2074
907	tas_mrsos	2004	2472	6.76447e-06	7.00684e-17	0	0	-5.94	0.2078
908	tas_mrsos	2004	2473	9.09607e-06	6.62258e-17	0	0	-4.59286	0.207714
909	tas_mrsos	2004	2474	2.75309e-05	1.33679e-16	0	0	-3.48571	0.208
910	tas_mrsos	2004	2475	3.74985e-05	1.50766e-16	0	0	-2.21538	0.207615
911	tas_mrsos	2004	2476	1.9681e-05	1.00767e-16	0	0	-1.06	0.2075
912	tas_mrsos	2004	2477	6.86613e-05	2.72943e-16	0	0	0.0407407	0.207444
913	tas_mrsos	2004	2478	7.64351e-05	2.28935e-16	0	0	1.25588	0.207206
914	tas_mrsos	2004	2479	6.39675e-05	2.45272e-16	0	0	2.38889	0.207778
915	tas_mrsos	2004	2480	9.81773e-05	2.31727e-16	0	0	3.50222	0.207556
916	tas_mrsos	2004	2481	0.000149079	3.82754e-16	0	1	4.77	0.20735
917	tas_mrsos	2004	2482	0.00027865	4.24601e-16	0	1	5.93676	0.207691
918	tas_mrsos	2004	2483	0.000401451	5.06585e-16	0	1	7.0284	0.207469
919	tas_mrsos	2004	2484	0.000475797	6.85638e-16	0	1	8.23944	0.207521
920	tas_mrsos	2004	2485	0.000611324	7.94878e-16	0	1	9.42338	0.207584
921	tas_mrsos	2004	2486	0.000924314	8.27811e-16	1	1	10.6144	0.207622
922	tas_mrsos	2004	2487	0.00109517	1.16184e-15	1	1	11.7495	0.207688
923	tas_mrsos	2004	2488	0.00145324	1.18649e-15	1	1	12.9182	0.207488
924	tas_mrsos	2004	2489	0.00115688	1.00257e-15	1	1	14.1026	0.207609
925	tas_mrsos	2004	2490	0.00134752	1.20711e-15	1	1	15.2306	0.207593
926	tas_mrsos	2004	2491	0.00160207	1.27261e-15	1	1	16.4266	0.207315
927	tas_mrsos	2004	2492	0.00173316	1.4177e-15	1	1	17.665	0.207538
928	tas_mrsos	2004	2493	0.00201281	1.44951e-15	1	1	18.7328	0.207466
929	tas_mrsos	2004	2494	0.00264444	1.37448e-15	1	1	19.9266	0.207522
930	tas_mrsos	2004	2495	0.00204617	1.07331e-15	1	1	21.1151	0.207453
931	tas_mrsos	2004	2496	0.00205287	9.87597e-16	1	1	22.2907	0.207397
932	tas_mrsos	2004	2497	0.00156576	8.16614e-16	1	1	23.4386	0.207301
933	tas_mrsos	2004	2498	0.00190393	8.82868e-16	1	1	24.5732	0.207515
934	tas_mrsos	2004	2499	0.00158423	6.83316e-16	1	1	25.7786	0.20765
935	tas_mrsos	2004	2500	0.00153592	7.30586e-16	1	1	26.9168	0.207459
936	tas_mrsos	2004	2501	0.00128912	7.47608e-16	1	1	28.1103	0.207471
937	tas_mrsos	2004	2502	0.000955855	7.21453e-16	1	1	29.2034	0.207585
938	tas_mrsos	2004	2503	0.000420429	5.45707e-16	0	1	30.3912	0.207397
939	tas_mrsos	2004	2504	0.000242025	5.09105e-16	0	1	31.5857	0.20719
940	tas_mrsos	2004	2505	5.73458e-05	2.61265e-16	0	0	32.7947	0.207263
941	tas_mrsos	2004	2506	3.16924e-05	1.56448e-16	0	0	33.9333	0.207833
942	tas_mrsos	2004	2507	7.68903e-06	5.28624e-17	0	0	34.9538	0.207077
943	tas_mrsos	2004	2508	6.53409e-06	1.94067e-16	0	0	36.1333	0.208
944	tas_mrsos	2004	2542	-2.26153e-07	-2.55906e-17	0	0	-18.3	0.212
945	tas_mrsos	2004	2543	-9.65863e-07	-1.96847e-17	0	0	-16.98	0.2104
946	tas_mrsos	2004	2544	-2.51144e-07	-2.55906e-17	0	0	-15.6	0.209
947	tas_mrsos	2004	2545	-2.15775e-07	-1.09222e-17	0	0	-15	0.2105
948	tas_mrsos	2004	2546	7.82807e-08	3.93701e-18	0	0	-13.25	0.21
949	tas_mrsos	2004	2547	-2.20213e-07	-1.18215e-17	0	0	-12.35	0.2105
950	tas_mrsos	2004	2548	1.83396e-06	3.88122e-17	0	0	-11.14	0.2108
951	tas_mrsos	2004	2549	4.17348e-06	1.08504e-16	0	0	-9.725	0.21
952	tas_mrsos	2004	2550	-3.47027e-07	-7.49495e-18	0	0	-8.66	0.2112
953	tas_mrsos	2004	2551	1.11976e-06	1.62026e-17	0	0	-7.5375	0.210375
954	tas_mrsos	2004	2552	1.42796e-05	9.13111e-17	0	0	-6.31875	0.211188
955	tas_mrsos	2004	2553	6.11573e-06	4.16473e-17	0	0	-5.31333	0.210867
956	tas_mrsos	2004	2554	9.95917e-06	5.46739e-17	0	0	-3.98421	0.210895
957	tas_mrsos	2004	2555	1.93977e-05	1.02881e-16	0	0	-2.88	0.2113
958	tas_mrsos	2004	2556	4.76995e-05	2.81937e-16	0	0	-1.60556	0.210778
959	tas_mrsos	2004	2557	3.35594e-05	1.00206e-16	0	0	-0.566667	0.211167
960	tas_mrsos	2004	2558	3.70843e-05	1.15326e-16	0	0	0.585294	0.211059
961	tas_mrsos	2004	2559	5.80633e-05	2.01987e-16	0	0	1.82903	0.211032
962	tas_mrsos	2004	2560	0.000122532	3.05473e-16	0	0	3.01905	0.211286
963	tas_mrsos	2004	2561	0.000160917	2.97802e-16	0	0	4.18519	0.211148
964	tas_mrsos	2004	2562	0.000299902	6.47846e-16	0	1	5.37083	0.211479
965	tas_mrsos	2004	2563	0.000333453	5.55865e-16	0	1	6.55556	0.211365
966	tas_mrsos	2004	2564	0.00065735	6.63846e-16	0	1	7.632	0.21096
967	tas_mrsos	2004	2565	0.000743405	7.76428e-16	0	1	8.86458	0.211
968	tas_mrsos	2004	2566	0.00058007	7.40188e-16	0	1	10.0087	0.211075
969	tas_mrsos	2004	2567	0.000846917	8.7356e-16	1	1	11.2144	0.211072
970	tas_mrsos	2004	2568	0.00140382	1.10146e-15	1	1	12.3654	0.211142
971	tas_mrsos	2004	2569	0.0014919	1.01223e-15	1	1	13.4883	0.211179
972	tas_mrsos	2004	2570	0.00189214	1.07248e-15	1	1	14.6549	0.211202
973	tas_mrsos	2004	2571	0.0013912	1.10482e-15	1	1	15.8397	0.211111
974	tas_mrsos	2004	2572	0.00204675	1.41963e-15	1	1	17.0144	0.211065
975	tas_mrsos	2004	2573	0.00243107	1.42396e-15	1	1	18.1333	0.211042
976	tas_mrsos	2004	2574	0.00260334	1.3373e-15	1	1	19.3321	0.211079
977	tas_mrsos	2004	2575	0.00208884	1.21131e-15	1	1	20.5108	0.211114
978	tas_mrsos	2004	2576	0.00279973	1.08085e-15	1	1	21.6571	0.211162
979	tas_mrsos	2004	2577	0.00203061	9.16981e-16	1	1	22.8603	0.211049
980	tas_mrsos	2004	2578	0.00193044	7.92714e-16	1	1	24.0423	0.211177
981	tas_mrsos	2004	2579	0.00174955	7.17336e-16	1	1	25.1928	0.211127
982	tas_mrsos	2004	2580	0.00166468	6.74675e-16	1	1	26.3326	0.211174
983	tas_mrsos	2004	2581	0.00128213	7.26051e-16	1	1	27.5281	0.211194
984	tas_mrsos	2004	2582	0.00121723	8.03065e-16	1	1	28.7044	0.211221
985	tas_mrsos	2004	2583	0.000728977	6.91211e-16	0	1	29.7813	0.210978
986	tas_mrsos	2004	2584	0.000232614	4.73088e-16	0	1	31	0.210955
987	tas_mrsos	2004	2585	0.000125383	3.42469e-16	0	0	32.1781	0.211469
988	tas_mrsos	2004	2586	2.56091e-07	9.53258e-19	0	0	33.3375	0.211292
989	tas_mrsos	2004	2587	7.1588e-06	7.16321e-17	0	0	34.7889	0.210444
990	tas_mrsos	2004	2588	2.29352e-06	6.93012e-17	0	0	35.4333	0.211667
991	tas_mrsos	2004	2589	-8.63599e-06	-2.63809e-16	0	0	37	0.21
992	tas_mrsos	2004	2623	-2.47799e-07	-2.55906e-17	0	0	-19	0.216
993	tas_mrsos	2004	2625	-5.05557e-07	-2.55906e-17	0	0	-16.05	0.213
994	tas_mrsos	2004	2627	-4.17318e-07	-1.06324e-17	0	0	-13.625	0.21375
995	tas_mrsos	2004	2628	-1.26809e-06	-2.55906e-17	0	0	-12.76	0.215
996	tas_mrsos	2004	2629	4.25267e-07	1.08357e-17	0	0	-11.45	0.21375
997	tas_mrsos	2004	2630	8.89253e-07	1.14375e-17	0	0	-10.5	0.214625
998	tas_mrsos	2004	2631	9.72136e-07	3.34646e-17	0	0	-9.23333	0.214667
999	tas_mrsos	2004	2632	4.29304e-06	8.68863e-17	0	0	-7.96	0.2154
1000	tas_mrsos	2004	2633	4.96216e-06	6.48692e-17	0	0	-6.8	0.21425
1001	tas_mrsos	2004	2634	2.9129e-05	2.28924e-16	0	0	-5.87692	0.214538
1002	tas_mrsos	2004	2635	2.67689e-05	1.40491e-16	0	0	-4.495	0.21475
1003	tas_mrsos	2004	2636	1.13911e-05	4.85502e-17	0	0	-3.45	0.214577
1004	tas_mrsos	2004	2637	2.41915e-05	9.30393e-17	0	0	-2.25714	0.214536
1005	tas_mrsos	2004	2638	5.28226e-05	1.66104e-16	0	0	-0.952941	0.214794
1006	tas_mrsos	2004	2639	3.12996e-05	1.4375e-16	0	0	0.121739	0.214739
1007	tas_mrsos	2004	264	-7.98667e-08	-2.55906e-17	0	0	-29.2	0.11
1008	tas_mrsos	2004	2640	7.66579e-05	2.30417e-16	0	0	1.27353	0.214588
1009	tas_mrsos	2004	2641	9.22339e-05	3.03793e-16	0	0	2.47812	0.214688
1010	tas_mrsos	2004	2642	0.000117744	3.0609e-16	0	0	3.59744	0.214718
1011	tas_mrsos	2004	2643	0.000162739	3.81027e-16	0	1	4.79583	0.214312
1012	tas_mrsos	2004	2644	0.000282418	4.8255e-16	0	1	5.94576	0.214729
1013	tas_mrsos	2004	2645	0.000476561	6.16237e-16	0	1	7.12278	0.214633
1014	tas_mrsos	2004	2646	0.000596417	6.59333e-16	0	1	8.20333	0.214767
1015	tas_mrsos	2004	2647	0.000762314	8.03539e-16	0	1	9.40206	0.214423
1016	tas_mrsos	2004	2648	0.00102387	8.97936e-16	1	1	10.5626	0.214626
1017	tas_mrsos	2004	2649	0.00112887	1.02523e-15	1	1	11.6757	0.21455
1018	tas_mrsos	2004	2650	0.00145367	9.7005e-16	1	1	12.9534	0.214705
1019	tas_mrsos	2004	2651	0.00160118	1.18382e-15	1	1	14.0956	0.214659
1020	tas_mrsos	2004	2652	0.00149968	1.24844e-15	1	1	15.2585	0.214686
1021	tas_mrsos	2004	2653	0.00194885	1.35548e-15	1	1	16.4362	0.214582
1022	tas_mrsos	2004	2654	0.0023149	1.55482e-15	1	1	17.6124	0.214676
1023	tas_mrsos	2004	2655	0.00249239	1.34666e-15	1	1	18.7931	0.214537
1024	tas_mrsos	2004	2656	0.00248503	1.29776e-15	1	1	19.9626	0.214668
1025	tas_mrsos	2004	2657	0.00267525	1.17102e-15	1	1	21.0379	0.214849
1026	tas_mrsos	2004	2658	0.00186658	9.61282e-16	1	1	22.2326	0.214663
1027	tas_mrsos	2004	2659	0.00226513	1.01209e-15	1	1	23.4029	0.214659
1028	tas_mrsos	2004	2660	0.00198924	7.96168e-16	1	1	24.6022	0.214643
1029	tas_mrsos	2004	2661	0.00205579	8.79294e-16	1	1	25.7241	0.214651
1030	tas_mrsos	2004	2662	0.00158272	7.203e-16	1	1	26.9232	0.214588
1031	tas_mrsos	2004	2663	0.00124547	6.17616e-16	1	1	28.045	0.214639
1032	tas_mrsos	2004	2664	0.000924934	8.20316e-16	1	1	29.232	0.21465
1033	tas_mrsos	2004	2665	0.000659373	9.70051e-16	0	1	30.3967	0.214383
1034	tas_mrsos	2004	2666	0.000359567	6.77714e-16	0	1	31.587	0.21463
1035	tas_mrsos	2004	2667	0.000110711	3.98508e-16	0	1	32.7	0.214833
1036	tas_mrsos	2004	2668	1.78422e-05	9.76794e-17	0	0	33.8125	0.214688
1037	tas_mrsos	2004	2669	3.99514e-05	3.9053e-16	0	1	35.0222	0.214667
1038	tas_mrsos	2004	2670	-6.33955e-08	-1.14508e-18	0	0	36.24	0.2138
1039	tas_mrsos	2004	2671	3.69619e-07	3.34646e-17	0	0	37.3	0.216
1040	tas_mrsos	2004	268	-7.98667e-08	-2.55906e-17	0	0	-24.9	0.111
1041	tas_mrsos	2004	2704	-2.10569e-07	-1.04656e-17	0	0	-18.15	0.2175
1042	tas_mrsos	2004	2705	-2.51144e-07	-2.55906e-17	0	0	-17.3	0.217
1043	tas_mrsos	2004	2706	-4.67033e-07	-2.55906e-17	0	0	-15.75	0.2175
1044	tas_mrsos	2004	2708	1.35134e-06	3.37961e-17	0	0	-13.125	0.2185
1045	tas_mrsos	2004	2709	2.72344e-06	9.29147e-17	0	0	-12.1333	0.218667
1046	tas_mrsos	2004	2710	7.62341e-08	3.93701e-18	0	0	-11.25	0.218
1047	tas_mrsos	2004	2711	-7.65791e-07	-8.92269e-18	0	0	-9.86667	0.218667
1048	tas_mrsos	2004	2712	3.03584e-06	5.3566e-17	0	0	-8.51667	0.2185
1049	tas_mrsos	2004	2713	2.18771e-06	4.83131e-17	0	0	-7.42	0.2184
1050	tas_mrsos	2004	2714	6.22746e-06	4.75473e-17	0	0	-6.39286	0.218714
1051	tas_mrsos	2004	2715	1.35221e-05	8.47865e-17	0	0	-5.20588	0.218118
1052	tas_mrsos	2004	2716	2.80118e-05	1.36534e-16	0	0	-3.95652	0.218174
1053	tas_mrsos	2004	2717	2.42905e-05	1.18409e-16	0	0	-2.81364	0.217864
1054	tas_mrsos	2004	2718	3.56055e-05	1.23491e-16	0	0	-1.60312	0.218312
1055	tas_mrsos	2004	2719	3.30698e-05	1.40144e-16	0	0	-0.503846	0.218346
1056	tas_mrsos	2004	2720	9.77081e-05	3.0954e-16	0	0	0.59375	0.218469
1057	tas_mrsos	2004	2721	0.000100645	3.31509e-16	0	0	1.80968	0.218419
1058	tas_mrsos	2004	2722	6.96219e-05	2.43843e-16	0	0	3.01613	0.218032
1059	tas_mrsos	2004	2723	0.00012083	2.54355e-16	0	0	4.10204	0.218224
1060	tas_mrsos	2004	2724	0.000357698	5.41578e-16	0	1	5.35588	0.218353
1061	tas_mrsos	2004	2725	0.000458499	5.56399e-16	0	1	6.51205	0.218193
1062	tas_mrsos	2004	2726	0.00082067	6.87133e-16	0	1	7.68537	0.218228
1063	tas_mrsos	2004	2727	0.00071784	6.90072e-16	0	1	8.84037	0.218174
1064	tas_mrsos	2004	2728	0.00114472	9.03993e-16	1	1	10.0287	0.218271
1065	tas_mrsos	2004	2729	0.00157535	1.02909e-15	1	1	11.2006	0.218245
1066	tas_mrsos	2004	2730	0.00158592	1.17645e-15	1	1	12.3185	0.218289
1067	tas_mrsos	2004	2731	0.00148209	1.10889e-15	1	1	13.5104	0.218321
1068	tas_mrsos	2004	2732	0.00151136	1.25122e-15	1	1	14.6949	0.218305
1069	tas_mrsos	2004	2733	0.00171284	1.37888e-15	1	1	15.8405	0.218167
1070	tas_mrsos	2004	2734	0.00291939	1.71912e-15	1	1	17.0515	0.218269
1071	tas_mrsos	2004	2735	0.0025704	1.46535e-15	1	1	18.204	0.218382
1072	tas_mrsos	2004	2736	0.00301318	1.50055e-15	1	1	19.3682	0.218278
1073	tas_mrsos	2004	2737	0.0027702	1.30869e-15	1	1	20.4801	0.21818
1074	tas_mrsos	2004	2738	0.00238091	1.15419e-15	1	1	21.6878	0.218393
1075	tas_mrsos	2004	2739	0.0031433	1.21931e-15	1	1	22.8498	0.21816
1076	tas_mrsos	2004	2740	0.00258763	9.62234e-16	1	1	24.0461	0.218272
1077	tas_mrsos	2004	2741	0.00260639	9.81954e-16	1	1	25.2154	0.218241
1078	tas_mrsos	2004	2742	0.00188155	7.7868e-16	1	1	26.3557	0.218228
1079	tas_mrsos	2004	2743	0.00169635	8.05077e-16	1	1	27.4879	0.218426
1080	tas_mrsos	2004	2744	0.00149505	9.07088e-16	1	1	28.6698	0.218188
1081	tas_mrsos	2004	2745	0.00113383	9.48879e-16	1	1	29.8213	0.218259
1082	tas_mrsos	2004	2746	0.000424873	6.46812e-16	0	1	31.0121	0.218379
1083	tas_mrsos	2004	2747	0.000100885	2.4136e-16	0	0	32.1361	0.218278
1084	tas_mrsos	2004	2748	2.66332e-05	1.45465e-16	0	0	33.5063	0.218
1085	tas_mrsos	2004	2749	2.2749e-05	2.88494e-16	0	0	34.4	0.218714
1086	tas_mrsos	2004	2750	2.28495e-05	5.08362e-16	0	1	35.7	0.21875
1087	tas_mrsos	2004	2751	5.54558e-06	8.20981e-17	0	0	36.55	0.217833
1088	tas_mrsos	2004	2784	-5.02289e-07	-2.55906e-17	0	0	-19.6	0.222
1089	tas_mrsos	2004	2785	6.56471e-07	6.29921e-17	0	0	-19.2	0.223
1090	tas_mrsos	2004	2788	-4.41425e-07	-1.53696e-17	0	0	-14.9333	0.221667
1091	tas_mrsos	2004	2789	-8.98704e-07	-1.55614e-17	0	0	-14.0167	0.222167
1092	tas_mrsos	2004	2790	-5.02211e-07	-2.55906e-17	0	0	-12.9	0.2215
1093	tas_mrsos	2004	2791	1.15402e-06	1.97188e-17	0	0	-11.6833	0.222167
1094	tas_mrsos	2004	2792	3.26072e-07	5.19937e-18	0	0	-10.4429	0.222429
1095	tas_mrsos	2004	2793	-9.31875e-07	-1.99192e-17	0	0	-9.48	0.2224
1096	tas_mrsos	2004	2794	1.37647e-07	4.722e-18	0	0	-8.16667	0.222333
1097	tas_mrsos	2004	2795	2.57757e-06	2.47577e-17	0	0	-6.86667	0.221417
1098	tas_mrsos	2004	2796	3.53234e-06	3.43078e-17	0	0	-5.7	0.221455
1099	tas_mrsos	2004	2797	3.17709e-05	1.71371e-16	0	0	-4.54	0.22225
1100	tas_mrsos	2004	2798	1.73143e-05	8.53782e-17	0	0	-3.37727	0.222227
1101	tas_mrsos	2004	2799	3.47435e-05	1.21614e-16	0	0	-2.19667	0.222067
1102	tas_mrsos	2004	280	-7.98667e-08	-2.55906e-17	0	0	-10.6	0.111
1103	tas_mrsos	2004	2800	2.93665e-05	9.39029e-17	0	0	-1.02941	0.221647
1104	tas_mrsos	2004	2801	5.10985e-05	1.247e-16	0	0	0.130233	0.222116
1105	tas_mrsos	2004	2802	6.32056e-05	1.74915e-16	0	0	1.25676	0.222216
1106	tas_mrsos	2004	2803	8.62619e-05	2.08881e-16	0	0	2.4093	0.22186
1107	tas_mrsos	2004	2804	0.000140205	3.22441e-16	0	0	3.59111	0.221956
1108	tas_mrsos	2004	2805	0.000241823	3.84684e-16	0	1	4.78636	0.221727
1109	tas_mrsos	2004	2806	0.000265833	3.94922e-16	0	1	5.91739	0.22213
1110	tas_mrsos	2004	2807	0.000658948	5.97852e-16	0	1	7.12124	0.221628
1111	tas_mrsos	2004	2808	0.000791448	7.04461e-16	0	1	8.26667	0.22193
1112	tas_mrsos	2004	2809	0.000861311	7.76449e-16	1	1	9.45172	0.221828
1113	tas_mrsos	2004	2810	0.00126445	9.28241e-16	1	1	10.6043	0.221885
1114	tas_mrsos	2004	2811	0.00142601	1.02228e-15	1	1	11.7775	0.221873
1115	tas_mrsos	2004	2812	0.00144097	1.18858e-15	1	1	12.9234	0.221815
1116	tas_mrsos	2004	2813	0.00148563	1.19953e-15	1	1	14.1081	0.221764
1117	tas_mrsos	2004	2814	0.00196785	1.35707e-15	1	1	15.2715	0.221938
1118	tas_mrsos	2004	2815	0.00200966	1.28102e-15	1	1	16.4465	0.222
1119	tas_mrsos	2004	2816	0.00352961	1.53945e-15	1	1	17.6367	0.221832
1120	tas_mrsos	2004	2817	0.00362836	1.40077e-15	1	1	18.7435	0.221774
1121	tas_mrsos	2004	2818	0.00335302	1.3195e-15	1	1	19.9518	0.22182
1122	tas_mrsos	2004	2819	0.00266904	1.15607e-15	1	1	21.127	0.221896
1123	tas_mrsos	2004	2820	0.00300291	1.20153e-15	1	1	22.2611	0.221791
1124	tas_mrsos	2004	2821	0.0024504	9.84243e-16	1	1	23.4357	0.22174
1125	tas_mrsos	2004	2822	0.00289148	9.45406e-16	1	1	24.6237	0.221827
1126	tas_mrsos	2004	2823	0.00224807	8.57325e-16	1	1	25.7227	0.221908
1127	tas_mrsos	2004	2824	0.00218032	8.94804e-16	1	1	26.9037	0.221806
1128	tas_mrsos	2004	2825	0.00147834	8.13078e-16	1	1	28.0727	0.222006
1129	tas_mrsos	2004	2826	0.000933373	6.85367e-16	1	1	29.2089	0.221992
1130	tas_mrsos	2004	2827	0.000719334	8.49342e-16	0	1	30.456	0.2218
1131	tas_mrsos	2004	2828	0.000229989	4.32478e-16	0	1	31.5745	0.221936
1132	tas_mrsos	2004	2829	6.32229e-05	2.70076e-16	0	0	32.7381	0.222286
1133	tas_mrsos	2004	2830	6.7087e-05	2.95624e-16	0	0	33.885	0.22185
1134	tas_mrsos	2004	2831	4.70969e-05	5.99645e-16	0	1	35.3857	0.222286
1135	tas_mrsos	2004	2832	-1.74943e-05	-4.0247e-16	0	0	36.35	0.22225
1136	tas_mrsos	2004	2833	-1.5592e-06	-1.43701e-16	0	0	37	0.223
1137	tas_mrsos	2004	284	-7.98667e-08	-2.55906e-17	0	0	-6.5	0.109
1138	tas_mrsos	2004	285	1.29887e-06	1.22047e-16	0	0	-5.2	0.111
1139	tas_mrsos	2004	286	1.28559e-06	1.22047e-16	0	0	-4.1	0.112
1140	tas_mrsos	2004	2867	-2.51144e-07	-2.55906e-17	0	0	-16.9	0.226
1141	tas_mrsos	2004	2868	-2.02242e-07	-1.05188e-17	0	0	-15.7	0.2255
1142	tas_mrsos	2004	2869	1.47228e-07	5.30253e-18	0	0	-14.5	0.225667
1143	tas_mrsos	2004	287	4.5471e-06	1.41532e-16	0	0	-2.775	0.11125
1144	tas_mrsos	2004	2870	-1.21244e-06	-2.05521e-17	0	0	-13.2667	0.2255
1145	tas_mrsos	2004	2871	-2.47799e-07	-2.55906e-17	0	0	-12.6	0.227
1146	tas_mrsos	2004	2872	3.9631e-08	3.93701e-18	0	0	-11.5	0.226
1147	tas_mrsos	2004	2873	-1.38097e-06	-2.17661e-17	0	0	-9.98571	0.226143
1148	tas_mrsos	2004	2874	3.41971e-06	4.05647e-17	0	0	-8.67778	0.225556
1149	tas_mrsos	2004	2875	1.09165e-05	6.59529e-17	0	0	-7.63529	0.225588
1150	tas_mrsos	2004	2876	6.0103e-06	8.97334e-17	0	0	-6.38571	0.225429
1151	tas_mrsos	2004	2877	5.19742e-06	6.27654e-17	0	0	-5.15556	0.225556
1152	tas_mrsos	2004	2878	4.39983e-05	1.46864e-16	0	0	-4.04839	0.225548
1153	tas_mrsos	2004	2879	2.73076e-05	1.03744e-16	0	0	-2.88966	0.225828
1154	tas_mrsos	2004	288	3.6906e-06	1.83058e-16	0	0	-1.8	0.112
1155	tas_mrsos	2004	2880	6.10343e-05	2.1597e-16	0	0	-1.62759	0.225828
1156	tas_mrsos	2004	2881	4.2005e-05	1.12936e-16	0	0	-0.490244	0.225634
1157	tas_mrsos	2004	2882	0.000124995	2.47679e-16	0	0	0.701887	0.22534
1158	tas_mrsos	2004	2883	9.13609e-05	1.94005e-16	0	0	1.8551	0.225735
1159	tas_mrsos	2004	2884	0.000194555	2.6678e-16	0	0	2.93158	0.225474
1160	tas_mrsos	2004	2885	0.000310277	3.85597e-16	0	1	4.18193	0.225313
1161	tas_mrsos	2004	2886	0.000300077	4.63875e-16	0	1	5.35652	0.225551
1162	tas_mrsos	2004	2887	0.000587054	6.21203e-16	0	1	6.49485	0.225505
1163	tas_mrsos	2004	2888	0.000698456	6.53274e-16	0	1	7.66364	0.225464
1164	tas_mrsos	2004	2889	0.00115638	9.01761e-16	1	1	8.8782	0.225263
1165	tas_mrsos	2004	289	5.58983e-06	1.44618e-16	0	0	-0.775	0.11175
1166	tas_mrsos	2004	2890	0.00104889	8.36142e-16	1	1	10.0225	0.225341
1167	tas_mrsos	2004	2891	0.00187227	1.17808e-15	1	1	11.1355	0.225422
1168	tas_mrsos	2004	2892	0.00184433	1.15849e-15	1	1	12.3466	0.225423
1169	tas_mrsos	2004	2893	0.00148409	1.06013e-15	1	1	13.451	0.225587
1170	tas_mrsos	2004	2894	0.00240093	1.37195e-15	1	1	14.618	0.225393
1171	tas_mrsos	2004	2895	0.0025378	1.32722e-15	1	1	15.851	0.225443
1172	tas_mrsos	2004	2896	0.00295061	1.61486e-15	1	1	17.0549	0.225445
1173	tas_mrsos	2004	2897	0.00378095	1.68127e-15	1	1	18.1546	0.225379
1174	tas_mrsos	2004	2898	0.00390619	1.60276e-15	1	1	19.356	0.225432
1175	tas_mrsos	2004	2899	0.00294923	1.31058e-15	1	1	20.4965	0.225535
1176	tas_mrsos	2004	290	1.26138e-05	2.4852e-16	0	0	0.82	0.1116
1177	tas_mrsos	2004	2900	0.0031959	1.23862e-15	1	1	21.6252	0.225407
1178	tas_mrsos	2004	2901	0.00303885	1.09274e-15	1	1	22.8596	0.225219
1179	tas_mrsos	2004	2902	0.00366816	1.10077e-15	1	1	24.0757	0.225421
1180	tas_mrsos	2004	2903	0.00261566	9.23612e-16	1	1	25.1571	0.22556
1181	tas_mrsos	2004	2904	0.00258844	8.38739e-16	1	1	26.3256	0.225458
1182	tas_mrsos	2004	2905	0.00218982	1.01897e-15	1	1	27.5833	0.225266
1183	tas_mrsos	2004	2906	0.00192641	1.11221e-15	1	1	28.6758	0.225359
1184	tas_mrsos	2004	2907	0.000958675	9.93194e-16	1	1	29.8226	0.225274
1185	tas_mrsos	2004	2908	0.000392432	7.66988e-16	0	1	30.9848	0.22513
1186	tas_mrsos	2004	2909	3.92848e-05	1.15555e-16	0	0	32.2267	0.225133
1187	tas_mrsos	2004	291	9.74176e-06	1.67565e-16	0	0	2.05	0.110333
1188	tas_mrsos	2004	2910	5.71678e-05	4.67497e-16	0	1	33.1273	0.224909
1189	tas_mrsos	2004	2911	2.01484e-05	2.99003e-16	0	0	34.6167	0.2265
1190	tas_mrsos	2004	2912	2.89499e-05	5.12056e-16	0	1	35.74	0.226
1191	tas_mrsos	2004	2913	-1.80067e-06	-8.16255e-17	0	0	37.1	0.2255
1192	tas_mrsos	2004	292	2.00151e-05	2.03481e-16	0	0	2.98	0.1106
1193	tas_mrsos	2004	293	4.1739e-05	2.05581e-16	0	0	4.18095	0.110952
1194	tas_mrsos	2004	294	6.48145e-05	3.03445e-16	0	0	5.27619	0.110905
1195	tas_mrsos	2004	2945	-2.47799e-07	-2.55906e-17	0	0	-20.8	0.231
1196	tas_mrsos	2004	2948	-2.18362e-07	-2.55906e-17	0	0	-17.4	0.231
1197	tas_mrsos	2004	2949	-2.51144e-07	-2.55906e-17	0	0	-16.2	0.23
1198	tas_mrsos	2004	295	8.90519e-05	2.97395e-16	0	0	6.46	0.1106
1199	tas_mrsos	2004	2952	3.36864e-07	3.34646e-17	0	0	-12.6	0.228
1200	tas_mrsos	2004	2953	-3.74357e-07	-7.65694e-18	0	0	-11.52	0.2286
1201	tas_mrsos	2004	2954	-5.38293e-07	-1.70506e-17	0	0	-10.875	0.22825
1202	tas_mrsos	2004	2955	-1.15734e-06	-1.70147e-17	0	0	-9.17143	0.229286
1203	tas_mrsos	2004	2956	5.962e-06	5.03935e-17	0	0	-8.10769	0.228923
1204	tas_mrsos	2004	2957	1.0748e-05	6.99543e-17	0	0	-6.76875	0.229063
1205	tas_mrsos	2004	2958	6.97784e-06	4.46999e-17	0	0	-5.76471	0.228824
1206	tas_mrsos	2004	2959	2.53438e-05	1.64665e-16	0	0	-4.58824	0.229118
1207	tas_mrsos	2004	296	0.000176261	3.50811e-16	0	0	7.7125	0.110708
1208	tas_mrsos	2004	2960	4.29123e-05	1.41962e-16	0	0	-3.44242	0.229182
1209	tas_mrsos	2004	2961	0.000103916	3.18088e-16	0	0	-2.175	0.229
1210	tas_mrsos	2004	2962	5.25086e-05	1.28862e-16	0	0	-1.13095	0.229024
1211	tas_mrsos	2004	2963	8.26579e-05	1.73166e-16	0	0	0.1	0.228882
1212	tas_mrsos	2004	2964	0.000121268	1.86398e-16	0	0	1.25714	0.229114
1213	tas_mrsos	2004	2965	0.000119419	2.42522e-16	0	0	2.39245	0.228774
1214	tas_mrsos	2004	2966	0.000258098	3.45969e-16	0	0	3.5026	0.228896
1215	tas_mrsos	2004	2967	0.000312103	3.60622e-16	0	0	4.78804	0.229141
1216	tas_mrsos	2004	2968	0.000644135	6.0291e-16	0	1	5.87117	0.228928
1217	tas_mrsos	2004	2969	0.000861058	6.48491e-16	1	1	7.11324	0.228897
1218	tas_mrsos	2004	297	0.000167953	3.28034e-16	0	0	8.88776	0.110714
1219	tas_mrsos	2004	2970	0.00101704	6.83629e-16	1	1	8.3	0.229102
1220	tas_mrsos	2004	2971	0.00102504	7.76305e-16	1	1	9.40145	0.229022
1221	tas_mrsos	2004	2972	0.00131805	8.73795e-16	1	1	10.5269	0.22905
1222	tas_mrsos	2004	2973	0.00155956	9.53041e-16	1	1	11.7667	0.22907
1223	tas_mrsos	2004	2974	0.00209595	1.3085e-15	1	1	12.9829	0.228915
1224	tas_mrsos	2004	2975	0.00249109	1.47094e-15	1	1	14.0747	0.229103
1225	tas_mrsos	2004	2976	0.00231023	1.44544e-15	1	1	15.2275	0.228982
1226	tas_mrsos	2004	2977	0.00323214	1.60083e-15	1	1	16.4657	0.229124
1227	tas_mrsos	2004	2978	0.00266485	1.41949e-15	1	1	17.6168	0.229068
1228	tas_mrsos	2004	2979	0.00448309	1.61481e-15	1	1	18.7778	0.228912
1229	tas_mrsos	2004	298	0.000263379	3.96962e-16	0	1	9.95645	0.110855
1230	tas_mrsos	2004	2980	0.00425054	1.45411e-15	1	1	19.9811	0.228962
1231	tas_mrsos	2004	2981	0.00306328	1.217e-15	1	1	21.1082	0.228975
1232	tas_mrsos	2004	2982	0.00332924	1.15512e-15	1	1	22.25	0.228957
1233	tas_mrsos	2004	2983	0.00419024	1.23974e-15	1	1	23.4649	0.228888
1234	tas_mrsos	2004	2984	0.00317062	1.05507e-15	1	1	24.5735	0.229007
1235	tas_mrsos	2004	2985	0.00243751	9.2126e-16	1	1	25.7275	0.228959
1236	tas_mrsos	2004	2986	0.0026035	1.00753e-15	1	1	26.9394	0.229072
1237	tas_mrsos	2004	2987	0.00227463	1.1507e-15	1	1	28.0564	0.228955
1238	tas_mrsos	2004	2988	0.00158678	9.42676e-16	1	1	29.22	0.228953
1239	tas_mrsos	2004	2989	0.00049719	5.69543e-16	0	1	30.4051	0.229077
1240	tas_mrsos	2004	299	0.000358901	4.63695e-16	0	1	11.1333	0.110861
1241	tas_mrsos	2004	2990	0.0001334	2.16449e-16	0	0	31.5764	0.229164
1242	tas_mrsos	2004	2991	0.000110724	4.06e-16	0	1	32.7875	0.229458
1243	tas_mrsos	2004	2992	7.26867e-06	1.26249e-16	0	0	33.8	0.2288
1244	tas_mrsos	2004	2993	1.44831e-05	2.58025e-16	0	0	35.02	0.2294
1245	tas_mrsos	2004	2994	1.06073e-06	4.76272e-17	0	0	36.05	0.2305
1246	tas_mrsos	2004	2995	-1.5592e-06	-1.43701e-16	0	0	37.3	0.228
1247	tas_mrsos	2004	300	0.000445827	4.43191e-16	0	1	12.3053	0.110798
1248	tas_mrsos	2004	301	0.000493951	4.10981e-16	0	1	13.4918	0.1107
1249	tas_mrsos	2004	302	0.00055707	4.51095e-16	0	1	14.6886	0.110658
1250	tas_mrsos	2004	3027	-2.44377e-07	-2.55906e-17	0	0	-18.8	0.234
1251	tas_mrsos	2004	3028	-1.17411e-07	-4.09988e-18	0	0	-17.7667	0.233667
1252	tas_mrsos	2004	3029	-2.37308e-07	-2.55906e-17	0	0	-16.4	0.232
1253	tas_mrsos	2004	303	0.000496421	3.90057e-16	0	1	15.8559	0.110542
1254	tas_mrsos	2004	3030	-6.13893e-07	-1.71092e-17	0	0	-15.925	0.233
1255	tas_mrsos	2004	3031	-6.61473e-07	-2.55906e-17	0	0	-14.8	0.231667
1256	tas_mrsos	2004	3032	-5.02211e-07	-2.55906e-17	0	0	-13.45	0.233
1257	tas_mrsos	2004	3033	1.41499e-06	2.46431e-17	0	0	-12.1	0.2325
1258	tas_mrsos	2004	3034	9.4937e-07	1.73648e-17	0	0	-11.1167	0.232833
1259	tas_mrsos	2004	3035	2.61379e-06	4.52601e-17	0	0	-9.76667	0.233
1260	tas_mrsos	2004	3036	3.30383e-06	2.43086e-17	0	0	-8.65714	0.232786
1261	tas_mrsos	2004	3037	2.01998e-06	5.44129e-17	0	0	-7.5	0.23325
1262	tas_mrsos	2004	3038	5.29449e-06	4.3107e-17	0	0	-6.4	0.232769
1263	tas_mrsos	2004	3039	4.84591e-05	2.66559e-16	0	0	-5.16316	0.232632
1264	tas_mrsos	2004	304	0.000706679	4.6574e-16	0	1	17.0237	0.110619
1265	tas_mrsos	2004	3040	2.15495e-05	1.15285e-16	0	0	-3.87273	0.232545
1266	tas_mrsos	2004	3041	4.43666e-05	1.48359e-16	0	0	-2.82812	0.232406
1267	tas_mrsos	2004	3042	4.95809e-05	1.37934e-16	0	0	-1.70526	0.232553
1268	tas_mrsos	2004	3043	6.05934e-05	1.58196e-16	0	0	-0.558537	0.232634
1269	tas_mrsos	2004	3044	7.5996e-05	1.28887e-16	0	0	0.646875	0.232531
1270	tas_mrsos	2004	3045	0.000110646	2.49996e-16	0	0	1.79375	0.2325
1271	tas_mrsos	2004	3046	0.000167831	2.8089e-16	0	0	2.99375	0.232719
1272	tas_mrsos	2004	3047	0.000411411	3.72868e-16	0	0	4.11111	0.23265
1273	tas_mrsos	2004	3048	0.000517297	4.97378e-16	0	1	5.33186	0.232726
1274	tas_mrsos	2004	3049	0.000762953	5.99456e-16	0	1	6.4985	0.232481
1275	tas_mrsos	2004	305	0.000905173	4.15647e-16	1	1	18.1734	0.110709
1276	tas_mrsos	2004	3050	0.00110747	6.69042e-16	1	1	7.66839	0.232621
1277	tas_mrsos	2004	3051	0.00117715	8.01535e-16	1	1	8.89684	0.232696
1278	tas_mrsos	2004	3052	0.00133471	8.94099e-16	1	1	10.0193	0.232528
1279	tas_mrsos	2004	3053	0.00185664	1.09728e-15	1	1	11.1533	0.232478
1280	tas_mrsos	2004	3054	0.00216217	1.04887e-15	1	1	12.3346	0.232562
1281	tas_mrsos	2004	3055	0.00245168	1.25956e-15	1	1	13.5284	0.232647
1282	tas_mrsos	2004	3056	0.00296779	1.32132e-15	1	1	14.6694	0.232574
1283	tas_mrsos	2004	3057	0.00318147	1.46035e-15	1	1	15.8586	0.232626
1284	tas_mrsos	2004	3058	0.00384308	1.75781e-15	1	1	17.0303	0.232667
1285	tas_mrsos	2004	3059	0.00449392	1.67609e-15	1	1	18.1574	0.232515
1286	tas_mrsos	2004	306	0.000924613	3.54968e-16	1	0	19.374	0.110847
1287	tas_mrsos	2004	3060	0.00422154	1.60865e-15	1	1	19.3392	0.232653
1288	tas_mrsos	2004	3061	0.00412999	1.50939e-15	1	1	20.5107	0.232544
1289	tas_mrsos	2004	3062	0.00355997	1.36658e-15	1	1	21.6664	0.232514
1290	tas_mrsos	2004	3063	0.00458854	1.50425e-15	1	1	22.8265	0.23253
1291	tas_mrsos	2004	3064	0.00347628	1.11957e-15	1	1	24.0442	0.23265
1292	tas_mrsos	2004	3065	0.00334262	1.14872e-15	1	1	25.1935	0.232521
1293	tas_mrsos	2004	3066	0.00307755	1.07694e-15	1	1	26.3461	0.232626
1294	tas_mrsos	2004	3067	0.00308594	1.19527e-15	1	1	27.5522	0.232595
1295	tas_mrsos	2004	3068	0.001844	1.11424e-15	1	1	28.6313	0.232604
1296	tas_mrsos	2004	3069	0.00117873	9.75334e-16	1	1	29.8231	0.232454
1297	tas_mrsos	2004	307	0.00119432	3.88135e-16	1	1	20.5379	0.110751
1298	tas_mrsos	2004	3070	0.000120454	2.27308e-16	0	0	31.0128	0.232809
1299	tas_mrsos	2004	3071	8.8346e-05	2.55433e-16	0	0	32.1187	0.232625
1300	tas_mrsos	2004	3072	2.15502e-05	3.79724e-16	0	1	33.14	0.2322
1301	tas_mrsos	2004	3073	5.20414e-05	3.85978e-16	0	1	34.475	0.233083
1302	tas_mrsos	2004	3074	4.39371e-06	1.3081e-16	0	0	35.6667	0.233
1303	tas_mrsos	2004	3075	-4.37156e-06	-9.85734e-17	0	0	36.725	0.23225
1304	tas_mrsos	2004	308	0.0014349	3.98664e-16	1	1	21.7103	0.110866
1305	tas_mrsos	2004	309	0.00174258	3.21582e-16	1	0	22.8583	0.110836
1306	tas_mrsos	2004	310	0.00126833	2.5189e-16	1	0	24.0422	0.110617
1307	tas_mrsos	2004	311	0.000788406	1.79434e-16	0	0	25.1961	0.110676
1308	tas_mrsos	2004	3110	-2.18362e-07	-2.55906e-17	0	0	-17.3	0.235
1309	tas_mrsos	2004	3111	-2.18362e-07	-2.55906e-17	0	0	-16.4	0.235
1310	tas_mrsos	2004	3112	-6.10578e-07	-2.33234e-17	0	0	-15.2667	0.237
1311	tas_mrsos	2004	3113	-8.96556e-07	-2.55906e-17	0	0	-14.175	0.23575
1312	tas_mrsos	2004	3114	-5.20923e-07	-9.61527e-18	0	0	-12.85	0.235667
1313	tas_mrsos	2004	3115	-7.46589e-07	-2.55906e-17	0	0	-11.6333	0.236333
1314	tas_mrsos	2004	3116	1.5643e-06	1.15822e-17	0	0	-10.32	0.236
1315	tas_mrsos	2004	3117	3.6253e-06	4.50676e-17	0	0	-9.24444	0.235889
1316	tas_mrsos	2004	3118	3.51446e-06	2.71641e-17	0	0	-8.00667	0.236067
1317	tas_mrsos	2004	3119	7.77433e-06	4.90589e-17	0	0	-6.98235	0.235824
1318	tas_mrsos	2004	312	0.000716094	1.55251e-16	0	0	26.3256	0.110771
1319	tas_mrsos	2004	3120	1.0768e-05	4.54221e-17	0	0	-5.636	0.236
1320	tas_mrsos	2004	3121	2.15247e-05	1.05736e-16	0	0	-4.58095	0.236667
1321	tas_mrsos	2004	3122	4.20693e-05	1.55926e-16	0	0	-3.425	0.235964
1322	tas_mrsos	2004	3123	6.16707e-05	1.37011e-16	0	0	-2.15472	0.236321
1323	tas_mrsos	2004	3124	3.66984e-05	8.93036e-17	0	0	-1.08889	0.235956
1324	tas_mrsos	2004	3125	7.23994e-05	1.63513e-16	0	0	0.0591837	0.23651
1325	tas_mrsos	2004	3126	0.000103746	1.43873e-16	0	0	1.33293	0.236098
1326	tas_mrsos	2004	3127	0.000162298	2.2191e-16	0	0	2.4023	0.236057
1327	tas_mrsos	2004	3128	0.000311201	3.13094e-16	0	0	3.61802	0.236243
1328	tas_mrsos	2004	3129	0.000608642	4.39381e-16	0	1	4.73038	0.236171
1329	tas_mrsos	2004	313	0.000116232	3.13717e-17	0	0	27.5323	0.110631
1330	tas_mrsos	2004	3130	0.000606213	5.36432e-16	0	1	5.91641	0.236156
1331	tas_mrsos	2004	3131	0.000982424	6.15936e-16	1	1	7.10056	0.236112
1332	tas_mrsos	2004	3132	0.00119114	7.2485e-16	1	1	8.27016	0.236115
1333	tas_mrsos	2004	3133	0.00157873	9.0342e-16	1	1	9.40204	0.23599
1334	tas_mrsos	2004	3134	0.00172203	1.00912e-15	1	1	10.5836	0.236049
1335	tas_mrsos	2004	3135	0.0020019	1.21241e-15	1	1	11.7517	0.236333
1336	tas_mrsos	2004	3136	0.00281403	1.29062e-15	1	1	12.9983	0.236367
1337	tas_mrsos	2004	3137	0.0028644	1.36436e-15	1	1	14.0907	0.236204
1338	tas_mrsos	2004	3138	0.00426806	1.57648e-15	1	1	15.2399	0.236212
1339	tas_mrsos	2004	3139	0.00407976	1.72183e-15	1	1	16.4378	0.236094
1340	tas_mrsos	2004	314	-0.00029327	-7.62842e-17	0	0	28.7281	0.110692
1341	tas_mrsos	2004	3140	0.00431743	1.70682e-15	1	1	17.5974	0.236146
1342	tas_mrsos	2004	3141	0.00610125	1.85584e-15	1	1	18.752	0.23627
1343	tas_mrsos	2004	3142	0.00470576	1.5511e-15	1	1	19.9549	0.236218
1344	tas_mrsos	2004	3143	0.00432216	1.4916e-15	1	1	21.1212	0.236194
1345	tas_mrsos	2004	3144	0.00473691	1.40149e-15	1	1	22.2466	0.236242
1346	tas_mrsos	2004	3145	0.0047762	1.41471e-15	1	1	23.4896	0.236071
1347	tas_mrsos	2004	3146	0.00386241	1.16545e-15	1	1	24.5782	0.236102
1348	tas_mrsos	2004	3147	0.00378047	1.10765e-15	1	1	25.7221	0.236214
1349	tas_mrsos	2004	3148	0.00368901	1.15647e-15	1	1	26.9265	0.236216
1350	tas_mrsos	2004	3149	0.00282579	1.2868e-15	1	1	28.0619	0.236247
1351	tas_mrsos	2004	315	-0.000353167	-8.44815e-17	0	0	29.8507	0.110681
1352	tas_mrsos	2004	3150	0.00174218	1.16899e-15	1	1	29.2381	0.236216
1353	tas_mrsos	2004	3151	0.000588449	6.60814e-16	0	1	30.4145	0.236157
1354	tas_mrsos	2004	3152	0.00016079	2.88259e-16	0	0	31.6255	0.236
1355	tas_mrsos	2004	3153	5.87933e-05	3.26221e-16	0	0	32.875	0.236187
1356	tas_mrsos	2004	3154	6.62939e-05	4.52001e-16	0	1	33.9769	0.235692
1357	tas_mrsos	2004	3155	2.05192e-05	3.65728e-16	0	0	35.14	0.2352
1358	tas_mrsos	2004	3156	9.47831e-06	4.1743e-16	0	1	36.3	0.2365
1359	tas_mrsos	2004	3157	7.15507e-06	3.13976e-16	0	0	37.05	0.237
1360	tas_mrsos	2004	316	-0.000221171	-7.19051e-17	0	0	31.0176	0.11082
1361	tas_mrsos	2004	317	0.000135228	6.0203e-17	0	0	32.2015	0.110648
1362	tas_mrsos	2004	318	-7.29942e-05	-4.49107e-17	0	0	33.2846	0.110657
1363	tas_mrsos	2004	3188	-2.44377e-07	-2.55906e-17	0	0	-20.9	0.239
1364	tas_mrsos	2004	319	-0.000103357	-1.18111e-16	0	0	34.5364	0.110545
1365	tas_mrsos	2004	3191	-2.22292e-07	-2.55906e-17	0	0	-16.5	0.239
1366	tas_mrsos	2004	3192	-2.47799e-07	-2.55906e-17	0	0	-15.7	0.24
1367	tas_mrsos	2004	3193	-2.57602e-07	-2.55906e-17	0	0	-14.4	0.239
1368	tas_mrsos	2004	3194	-4.15228e-07	-1.5516e-17	0	0	-13.3333	0.24
1369	tas_mrsos	2004	3195	-7.86564e-07	-1.23939e-17	0	0	-12.0857	0.239286
1370	tas_mrsos	2004	3196	-5.68121e-07	-1.33629e-17	0	0	-11.18	0.2406
1371	tas_mrsos	2004	3197	-5.15095e-07	-3.49522e-18	0	0	-9.74375	0.239937
1372	tas_mrsos	2004	3198	3.25863e-06	2.91815e-17	0	0	-8.71538	0.240077
1373	tas_mrsos	2004	3199	7.92222e-06	7.60986e-17	0	0	-7.625	0.239917
1374	tas_mrsos	2004	320	-1.76675e-05	-3.12001e-17	0	0	35.7275	0.110627
1375	tas_mrsos	2004	3200	1.73338e-05	7.44632e-17	0	0	-6.336	0.2398
1376	tas_mrsos	2004	3201	3.18168e-05	1.34697e-16	0	0	-5.248	0.23948
1377	tas_mrsos	2004	3202	5.09366e-05	1.38594e-16	0	0	-4.03659	0.239902
1378	tas_mrsos	2004	3203	6.80232e-05	1.68034e-16	0	0	-2.875	0.239841
1379	tas_mrsos	2004	3204	0.000116152	2.02118e-16	0	0	-1.77143	0.239514
1380	tas_mrsos	2004	3205	9.764e-05	1.6831e-16	0	0	-0.51875	0.239828
1381	tas_mrsos	2004	3206	0.000154119	2.46527e-16	0	0	0.625	0.239868
1382	tas_mrsos	2004	3207	0.000257471	2.97039e-16	0	0	1.81359	0.23967
1383	tas_mrsos	2004	3208	0.00032367	2.81574e-16	0	0	2.92569	0.23984
1384	tas_mrsos	2004	3209	0.000360841	3.24749e-16	0	0	4.15368	0.240044
1385	tas_mrsos	2004	321	0.000119302	1.61139e-16	0	0	36.853	0.110924
1386	tas_mrsos	2004	3210	0.000613364	5.14116e-16	0	1	5.3437	0.239763
1387	tas_mrsos	2004	3211	0.000794803	5.97718e-16	0	1	6.50132	0.239717
1388	tas_mrsos	2004	3212	0.000930018	6.53142e-16	1	1	7.62024	0.239685
1389	tas_mrsos	2004	3213	0.00134392	8.34494e-16	1	1	8.84728	0.239799
1390	tas_mrsos	2004	3214	0.00193044	1.0561e-15	1	1	9.99272	0.239772
1391	tas_mrsos	2004	3215	0.00216444	1.15833e-15	1	1	11.1292	0.239824
1392	tas_mrsos	2004	3216	0.00307312	1.43933e-15	1	1	12.3221	0.239675
1393	tas_mrsos	2004	3217	0.00350122	1.46456e-15	1	1	13.5202	0.239818
1394	tas_mrsos	2004	3218	0.00392701	1.52186e-15	1	1	14.6997	0.239678
1395	tas_mrsos	2004	3219	0.00417957	1.66387e-15	1	1	15.8339	0.23992
1396	tas_mrsos	2004	322	-3.5242e-05	-1.69381e-16	0	0	37.9474	0.110421
1397	tas_mrsos	2004	3220	0.00447962	1.71894e-15	1	1	16.9859	0.239808
1398	tas_mrsos	2004	3221	0.00498265	1.84815e-15	1	1	18.1828	0.239846
1399	tas_mrsos	2004	3222	0.00548631	1.77182e-15	1	1	19.3532	0.23988
1400	tas_mrsos	2004	3223	0.0050643	1.74681e-15	1	1	20.52	0.239797
1401	tas_mrsos	2004	3224	0.00419736	1.33134e-15	1	1	21.6744	0.239831
1402	tas_mrsos	2004	3225	0.00546905	1.45996e-15	1	1	22.8422	0.239752
1403	tas_mrsos	2004	3226	0.00505353	1.35892e-15	1	1	24.0457	0.239754
1404	tas_mrsos	2004	3227	0.00401045	1.37242e-15	1	1	25.1837	0.239745
1405	tas_mrsos	2004	3228	0.00422222	1.33516e-15	1	1	26.3779	0.239875
1406	tas_mrsos	2004	3229	0.00400681	1.38942e-15	1	1	27.5108	0.239736
1407	tas_mrsos	2004	323	-2.16809e-05	-2.79468e-16	0	0	39.3571	0.111143
1408	tas_mrsos	2004	3230	0.00194838	1.29455e-15	1	1	28.6235	0.23972
1409	tas_mrsos	2004	3231	0.000956471	9.88703e-16	1	1	29.8483	0.239471
1410	tas_mrsos	2004	3232	0.000488073	8.61448e-16	0	1	31.0255	0.239706
1411	tas_mrsos	2004	3233	0.000162746	6.8171e-16	0	1	32.119	0.239857
1412	tas_mrsos	2004	3234	9.72826e-05	7.15445e-16	0	1	33.0833	0.239333
1413	tas_mrsos	2004	3235	3.84978e-05	6.82881e-16	0	1	34.56	0.2394
1414	tas_mrsos	2004	3236	3.93119e-05	7.0171e-16	0	1	35.72	0.24
1415	tas_mrsos	2004	324	-3.9025e-06	-3.50394e-16	0	0	39.8	0.111
1416	tas_mrsos	2004	3271	-2.44377e-07	-2.55906e-17	0	0	-18.3	0.243
1417	tas_mrsos	2004	3272	-2.47799e-07	-2.55906e-17	0	0	-17.6	0.242
1418	tas_mrsos	2004	3273	-3.38373e-07	-2.55906e-17	0	0	-16.25	0.2445
1419	tas_mrsos	2004	3274	-1.17365e-06	-3.05286e-17	0	0	-14.96	0.2436
1420	tas_mrsos	2004	3275	-1.38144e-06	-2.12022e-17	0	0	-13.7857	0.243429
1421	tas_mrsos	2004	3276	-1.93621e-07	-3.06871e-18	0	0	-12.9286	0.243429
1422	tas_mrsos	2004	3277	-5.64391e-07	-1.70648e-17	0	0	-11.575	0.24325
1423	tas_mrsos	2004	3278	-5.53198e-07	-3.79146e-18	0	0	-10.5375	0.243875
1424	tas_mrsos	2004	3279	5.52623e-06	3.40577e-17	0	0	-9.30588	0.242765
1425	tas_mrsos	2004	3280	9.46605e-06	5.09774e-17	0	0	-8.06667	0.242762
1426	tas_mrsos	2004	3281	2.22366e-05	1.72069e-16	0	0	-7.09286	0.243571
1427	tas_mrsos	2004	3282	1.7997e-05	5.21888e-17	0	0	-5.82105	0.243368
1428	tas_mrsos	2004	3283	4.177e-05	1.54421e-16	0	0	-4.66207	0.243069
1429	tas_mrsos	2004	3284	3.37545e-05	8.69369e-17	0	0	-3.46512	0.243349
1430	tas_mrsos	2004	3285	0.00012676	2.66991e-16	0	0	-2.22545	0.243473
1431	tas_mrsos	2004	3286	7.7871e-05	1.60561e-16	0	0	-1.155	0.243333
1432	tas_mrsos	2004	3287	0.000127473	2.12261e-16	0	0	0.0901408	0.243606
1433	tas_mrsos	2004	3288	0.000163378	2.1064e-16	0	0	1.27527	0.243398
1434	tas_mrsos	2004	3289	0.00035348	2.99131e-16	0	0	2.44521	0.243123
1435	tas_mrsos	2004	3290	0.000411809	3.85341e-16	0	1	3.55652	0.243493
1436	tas_mrsos	2004	3291	0.000454706	4.18443e-16	0	1	4.69496	0.243446
1437	tas_mrsos	2004	3292	0.00067721	5.70205e-16	0	1	5.925	0.243372
1438	tas_mrsos	2004	3293	0.000992586	6.39297e-16	1	1	7.06957	0.24338
1439	tas_mrsos	2004	3294	0.00137698	8.92816e-16	1	1	8.28287	0.243271
1440	tas_mrsos	2004	3295	0.00190567	1.01294e-15	1	1	9.42294	0.243362
1441	tas_mrsos	2004	3296	0.00263475	1.27001e-15	1	1	10.561	0.243233
1442	tas_mrsos	2004	3297	0.0029116	1.33268e-15	1	1	11.7668	0.243514
1443	tas_mrsos	2004	3298	0.0031638	1.43933e-15	1	1	12.9508	0.243248
1444	tas_mrsos	2004	3299	0.00391157	1.55393e-15	1	1	14.1117	0.243244
1445	tas_mrsos	2004	3300	0.00524286	1.84148e-15	1	1	15.3062	0.243505
1446	tas_mrsos	2004	3301	0.00542476	1.94055e-15	1	1	16.4428	0.243512
1447	tas_mrsos	2004	3302	0.00481967	1.75994e-15	1	1	17.6311	0.243317
1448	tas_mrsos	2004	3303	0.00569997	1.86226e-15	1	1	18.7905	0.243298
1449	tas_mrsos	2004	3304	0.00530043	1.7421e-15	1	1	19.9054	0.243343
1450	tas_mrsos	2004	3305	0.0048622	1.50364e-15	1	1	21.1184	0.243262
1451	tas_mrsos	2004	3306	0.00523227	1.50233e-15	1	1	22.2738	0.24337
1452	tas_mrsos	2004	3307	0.00481857	1.40195e-15	1	1	23.4122	0.243339
1453	tas_mrsos	2004	3308	0.00496038	1.34206e-15	1	1	24.5947	0.243329
1454	tas_mrsos	2004	3309	0.0039676	1.17713e-15	1	1	25.7849	0.24346
1455	tas_mrsos	2004	3310	0.00365887	1.39457e-15	1	1	26.9454	0.24348
1456	tas_mrsos	2004	3311	0.00370267	1.79426e-15	1	1	28.0165	0.243278
1457	tas_mrsos	2004	3312	0.00168906	1.34801e-15	1	1	29.2391	0.243364
1458	tas_mrsos	2004	3313	0.000472848	8.10283e-16	0	1	30.4863	0.243569
1459	tas_mrsos	2004	3314	0.00023347	6.81178e-16	0	1	31.5133	0.243367
1460	tas_mrsos	2004	3315	4.72962e-05	3.85394e-16	0	1	32.7636	0.243182
1461	tas_mrsos	2004	3316	4.06509e-05	4.51613e-16	0	1	33.9	0.24275
1462	tas_mrsos	2004	3317	5.24414e-05	7.61882e-16	0	1	35.0833	0.242833
1463	tas_mrsos	2004	3318	5.24387e-05	7.66379e-16	0	1	36.2333	0.242833
1464	tas_mrsos	2004	3342	-9.05739e-08	-2.55906e-17	0	0	-29.7	0.247
1465	tas_mrsos	2004	3343	-9.05739e-08	-2.55906e-17	0	0	-28.1	0.248
1466	tas_mrsos	2004	3344	-9.05739e-08	-2.55906e-17	0	0	-27.3	0.247
1467	tas_mrsos	2004	3348	-4.0344e-07	-2.55906e-17	0	0	-22.8333	0.247667
1468	tas_mrsos	2004	3352	-2.47799e-07	-2.55906e-17	0	0	-18.4	0.248
1469	tas_mrsos	2004	3354	-3.66366e-07	-1.44608e-17	0	0	-15.625	0.24625
1470	tas_mrsos	2004	3355	-9.58276e-07	-2.55906e-17	0	0	-14.35	0.246
1471	tas_mrsos	2004	3356	-1.40919e-07	-1.33531e-18	0	0	-13.45	0.247
1472	tas_mrsos	2004	3357	-4.43897e-07	-6.12966e-18	0	0	-12.1	0.247125
1473	tas_mrsos	2004	3358	-9.71602e-07	-1.99642e-17	0	0	-11.15	0.2475
1474	tas_mrsos	2004	3359	1.28258e-06	8.89534e-18	0	0	-9.97647	0.247235
1475	tas_mrsos	2004	3360	4.0544e-06	2.64675e-17	0	0	-8.71176	0.246706
1476	tas_mrsos	2004	3361	3.54284e-06	2.7711e-17	0	0	-7.55	0.2465
1477	tas_mrsos	2004	3362	1.6127e-05	7.19736e-17	0	0	-6.38519	0.24737
1478	tas_mrsos	2004	3363	2.70641e-05	1.0049e-16	0	0	-5.14667	0.246733
1479	tas_mrsos	2004	3364	4.64745e-05	1.20393e-16	0	0	-4.03333	0.247089
1480	tas_mrsos	2004	3365	6.06183e-05	1.34815e-16	0	0	-2.79825	0.246895
1481	tas_mrsos	2004	3366	7.42012e-05	1.41466e-16	0	0	-1.65938	0.246719
1482	tas_mrsos	2004	3367	9.92282e-05	1.33067e-16	0	0	-0.525	0.247068
1483	tas_mrsos	2004	3368	0.000220945	2.77286e-16	0	0	0.678	0.24706
1484	tas_mrsos	2004	3369	0.000224604	2.40955e-16	0	0	1.82124	0.246894
1485	tas_mrsos	2004	3370	0.000364819	3.40302e-16	0	0	2.98099	0.246866
1486	tas_mrsos	2004	3371	0.000444698	3.44726e-16	0	0	4.14938	0.246784
1487	tas_mrsos	2004	3372	0.000621752	4.84528e-16	0	1	5.40189	0.246937
1488	tas_mrsos	2004	3373	0.000643402	5.34158e-16	0	1	6.458	0.24686
1489	tas_mrsos	2004	3374	0.00120961	7.75644e-16	1	1	7.61978	0.247044
1490	tas_mrsos	2004	3375	0.00179065	1.07532e-15	1	1	8.82513	0.246915
1491	tas_mrsos	2004	3376	0.00238093	1.19933e-15	1	1	10.0004	0.246971
1492	tas_mrsos	2004	3377	0.00337943	1.40246e-15	1	1	11.1916	0.247132
1493	tas_mrsos	2004	3378	0.00367205	1.38634e-15	1	1	12.3414	0.24705
1494	tas_mrsos	2004	3379	0.00456948	1.73054e-15	1	1	13.5106	0.247026
1495	tas_mrsos	2004	3380	0.00484333	1.79993e-15	1	1	14.6987	0.246975
1496	tas_mrsos	2004	3381	0.00594455	2.03147e-15	1	1	15.8525	0.246994
1497	tas_mrsos	2004	3382	0.00582171	2.0156e-15	1	1	16.9987	0.246884
1498	tas_mrsos	2004	3383	0.00589492	1.92246e-15	1	1	18.1517	0.246882
1499	tas_mrsos	2004	3384	0.00648926	1.85893e-15	1	1	19.3368	0.246964
1500	tas_mrsos	2004	3385	0.0056779	1.70046e-15	1	1	20.4967	0.246849
1501	tas_mrsos	2004	3386	0.00543664	1.61892e-15	1	1	21.6601	0.246882
1502	tas_mrsos	2004	3387	0.00572438	1.55263e-15	1	1	22.8471	0.246922
1503	tas_mrsos	2004	3388	0.00437186	1.27754e-15	1	1	24.0373	0.246956
1504	tas_mrsos	2004	3389	0.00361004	1.09513e-15	1	1	25.1915	0.24698
1505	tas_mrsos	2004	3390	0.00481929	1.33332e-15	1	1	26.3283	0.246909
1506	tas_mrsos	2004	3391	0.00452851	1.80139e-15	1	1	27.4731	0.246856
1507	tas_mrsos	2004	3392	0.00210848	1.60896e-15	1	1	28.6575	0.246814
1508	tas_mrsos	2004	3393	0.00096994	1.19953e-15	1	1	29.7746	0.247113
1509	tas_mrsos	2004	3394	0.000391978	8.64261e-16	0	1	30.9925	0.24685
1510	tas_mrsos	2004	3395	0.000148839	5.94236e-16	0	1	32.2	0.246909
1511	tas_mrsos	2004	3396	8.62436e-05	6.23649e-16	0	1	33.4083	0.246667
1512	tas_mrsos	2004	3397	5.08186e-05	8.8361e-16	0	1	34.52	0.246
1513	tas_mrsos	2004	3398	8.54588e-05	8.37601e-16	0	1	35.5222	0.246778
1514	tas_mrsos	2004	3412	-9.05739e-08	-2.55906e-17	0	0	-43.1	0.249
1515	tas_mrsos	2004	3419	-9.05739e-08	-2.55906e-17	0	0	-34.6	0.25
1516	tas_mrsos	2004	3423	-9.05739e-08	-2.55906e-17	0	0	-29.8	0.25
1517	tas_mrsos	2004	3429	-2.22292e-07	-2.55906e-17	0	0	-23.7	0.252
1518	tas_mrsos	2004	3431	-3.16727e-07	-2.55906e-17	0	0	-20.85	0.2515
1519	tas_mrsos	2004	3433	-9.05739e-08	-2.55906e-17	0	0	-18.7	0.252
1520	tas_mrsos	2004	3434	-6.39294e-07	-1.73375e-17	0	0	-17.425	0.25075
1521	tas_mrsos	2004	3435	-2.14363e-07	-2.55906e-17	0	0	-16.4	0.249
1522	tas_mrsos	2004	3436	-5.63407e-07	-1.33007e-17	0	0	-14.9333	0.25
1523	tas_mrsos	2004	3437	-1.99655e-06	-2.00511e-17	0	0	-13.9667	0.250833
1524	tas_mrsos	2004	3438	-1.16467e-06	-1.10167e-17	0	0	-12.6333	0.250667
1525	tas_mrsos	2004	3439	3.78534e-08	4.10017e-19	0	0	-11.5455	0.250273
1526	tas_mrsos	2004	3440	5.67036e-07	3.70169e-18	0	0	-10.3722	0.250111
1527	tas_mrsos	2004	3441	2.46206e-06	2.22385e-17	0	0	-9.26154	0.250538
1528	tas_mrsos	2004	3442	1.67877e-06	2.11805e-17	0	0	-8.1	0.250667
1529	tas_mrsos	2004	3443	3.86711e-06	2.48113e-17	0	0	-6.91667	0.250778
1530	tas_mrsos	2004	3444	1.38212e-05	8.326e-17	0	0	-5.74211	0.250211
1531	tas_mrsos	2004	3445	2.47286e-05	7.90925e-17	0	0	-4.56486	0.250486
1532	tas_mrsos	2004	3446	5.85948e-05	1.12232e-16	0	0	-3.33793	0.250414
1533	tas_mrsos	2004	3447	0.000110252	1.8306e-16	0	0	-2.21029	0.250441
1534	tas_mrsos	2004	3448	0.000106822	1.62627e-16	0	0	-1.10617	0.25063
1535	tas_mrsos	2004	3449	0.000202162	2.48945e-16	0	0	0.103093	0.250505
1536	tas_mrsos	2004	3450	0.000228883	2.63366e-16	0	0	1.25514	0.250626
1537	tas_mrsos	2004	3451	0.000266106	2.98624e-16	0	0	2.4431	0.25056
1538	tas_mrsos	2004	3452	0.000451073	3.71325e-16	0	0	3.56541	0.250528
1539	tas_mrsos	2004	3453	0.000530914	4.3786e-16	0	1	4.72857	0.250435
1540	tas_mrsos	2004	3454	0.000638623	5.40464e-16	0	1	5.90563	0.250479
1541	tas_mrsos	2004	3455	0.00108566	7.12438e-16	1	1	7.11366	0.250612
1542	tas_mrsos	2004	3456	0.00142472	8.82868e-16	1	1	8.26477	0.250684
1543	tas_mrsos	2004	3457	0.00206295	1.05732e-15	1	1	9.43833	0.250471
1544	tas_mrsos	2004	3458	0.00286905	1.26113e-15	1	1	10.5823	0.250491
1545	tas_mrsos	2004	3459	0.00403887	1.4783e-15	1	1	11.7654	0.250406
1546	tas_mrsos	2004	3460	0.00427454	1.61692e-15	1	1	12.9259	0.25052
1547	tas_mrsos	2004	3461	0.00540885	1.77181e-15	1	1	14.1145	0.250567
1548	tas_mrsos	2004	3462	0.00554231	1.9919e-15	1	1	15.2188	0.250576
1549	tas_mrsos	2004	3463	0.00618499	2.14516e-15	1	1	16.4325	0.250453
1550	tas_mrsos	2004	3464	0.00571233	1.98902e-15	1	1	17.6275	0.250487
1551	tas_mrsos	2004	3465	0.00653178	1.99736e-15	1	1	18.7646	0.250444
1552	tas_mrsos	2004	3466	0.00718467	1.94002e-15	1	1	19.9504	0.25046
1553	tas_mrsos	2004	3467	0.00495142	1.64443e-15	1	1	21.0849	0.250518
1554	tas_mrsos	2004	3468	0.00526344	1.52779e-15	1	1	22.283	0.250679
1555	tas_mrsos	2004	3469	0.00577705	1.51962e-15	1	1	23.4345	0.25044
1556	tas_mrsos	2004	3470	0.00424711	1.18161e-15	1	1	24.6066	0.250403
1557	tas_mrsos	2004	3471	0.00396049	1.27158e-15	1	1	25.8004	0.250476
1558	tas_mrsos	2004	3472	0.00429882	1.45041e-15	1	1	26.9245	0.250568
1559	tas_mrsos	2004	3473	0.00292928	1.71537e-15	1	1	28.0918	0.250449
1560	tas_mrsos	2004	3474	0.00120199	1.37625e-15	1	1	29.2675	0.250299
1561	tas_mrsos	2004	3475	0.000455558	1.01694e-15	0	1	30.3205	0.250795
1562	tas_mrsos	2004	3476	0.00018132	6.87657e-16	0	1	31.5565	0.25013
1563	tas_mrsos	2004	3477	8.44337e-05	5.68216e-16	0	1	32.8308	0.250615
1564	tas_mrsos	2004	3478	2.72771e-05	7.94474e-16	0	1	33.8	0.250333
1565	tas_mrsos	2004	3479	4.91199e-05	1.07838e-15	0	1	35.125	0.2495
1566	tas_mrsos	2004	3505	-9.05739e-08	-2.55906e-17	0	0	-28.7	0.255
1567	tas_mrsos	2004	3509	-7.98667e-08	-2.55906e-17	0	0	-24.1	0.253
1568	tas_mrsos	2004	3510	-7.14469e-07	-2.55906e-17	0	0	-22.4667	0.254333
1569	tas_mrsos	2004	3511	-3.12866e-07	-2.55906e-17	0	0	-21.4	0.2535
1570	tas_mrsos	2004	3512	-2.18362e-07	-2.55906e-17	0	0	-20.5	0.253
1571	tas_mrsos	2004	3513	-4.40654e-07	-2.55906e-17	0	0	-19.25	0.2535
1572	tas_mrsos	2004	3515	-1.77304e-07	-9.9668e-18	0	0	-16.85	0.2545
1573	tas_mrsos	2004	3516	-8.65781e-07	-2.55906e-17	0	0	-15.825	0.2535
1574	tas_mrsos	2004	3517	-5.64393e-07	-1.59171e-17	0	0	-14.64	0.2548
1575	tas_mrsos	2004	3518	-2.37508e-06	-1.98988e-17	0	0	-13.3643	0.254
1576	tas_mrsos	2004	3519	-1.49624e-06	-1.02705e-17	0	0	-12.0722	0.254389
1577	tas_mrsos	2004	3520	-3.10365e-07	-2.88995e-18	0	0	-11.0692	0.254154
1578	tas_mrsos	2004	3521	-1.9755e-06	-1.22926e-17	0	0	-9.89444	0.2535
1579	tas_mrsos	2004	3522	2.4047e-06	1.49519e-17	0	0	-8.67	0.25425
1580	tas_mrsos	2004	3523	8.62529e-06	4.58211e-17	0	0	-7.46818	0.254045
1581	tas_mrsos	2004	3524	1.9959e-05	6.74913e-17	0	0	-6.17941	0.254
1582	tas_mrsos	2004	3525	2.31986e-05	8.02155e-17	0	0	-5.10571	0.254114
1583	tas_mrsos	2004	3526	8.64532e-05	1.81578e-16	0	0	-4.00727	0.253945
1584	tas_mrsos	2004	3527	0.000122271	2.14275e-16	0	0	-2.78806	0.254254
1585	tas_mrsos	2004	3528	8.28707e-05	1.31211e-16	0	0	-1.64658	0.253932
1586	tas_mrsos	2004	3529	0.000196968	2.17622e-16	0	0	-0.5	0.254171
1587	tas_mrsos	2004	3530	0.000299836	2.758e-16	0	0	0.694737	0.254128
1588	tas_mrsos	2004	3531	0.000317139	2.86579e-16	0	0	1.79929	0.254057
1589	tas_mrsos	2004	3532	0.000526895	4.27508e-16	0	1	2.94167	0.254135
1590	tas_mrsos	2004	3533	0.000478889	4.5345e-16	0	1	4.20571	0.254029
1591	tas_mrsos	2004	3534	0.000662463	5.35528e-16	0	1	5.29317	0.254118
1592	tas_mrsos	2004	3535	0.00113936	8.00479e-16	1	1	6.53023	0.254122
1593	tas_mrsos	2004	3536	0.00152668	8.43724e-16	1	1	7.68482	0.254107
1594	tas_mrsos	2004	3537	0.00190867	9.89857e-16	1	1	8.86695	0.254079
1595	tas_mrsos	2004	3538	0.00271096	1.19437e-15	1	1	9.99046	0.254269
1596	tas_mrsos	2004	3539	0.00411036	1.54438e-15	1	1	11.162	0.254079
1597	tas_mrsos	2004	3540	0.00430008	1.55006e-15	1	1	12.3509	0.253879
1598	tas_mrsos	2004	3541	0.00535889	1.77805e-15	1	1	13.4986	0.254126
1599	tas_mrsos	2004	3542	0.00602903	1.962e-15	1	1	14.6831	0.253981
1600	tas_mrsos	2004	3543	0.00694411	2.17824e-15	1	1	15.8171	0.254064
1601	tas_mrsos	2004	3544	0.00636354	2.14e-15	1	1	16.9962	0.254224
1602	tas_mrsos	2004	3545	0.00757539	2.07998e-15	1	1	18.1352	0.254148
1603	tas_mrsos	2004	3546	0.00662275	2.01811e-15	1	1	19.3422	0.253969
1604	tas_mrsos	2004	3547	0.00594477	1.74253e-15	1	1	20.4765	0.254067
1605	tas_mrsos	2004	3548	0.0060371	1.81613e-15	1	1	21.6668	0.254218
1606	tas_mrsos	2004	3549	0.00587721	1.58442e-15	1	1	22.8387	0.254133
1607	tas_mrsos	2004	3550	0.00458323	1.24632e-15	1	1	24.0372	0.254148
1608	tas_mrsos	2004	3551	0.00555674	1.39854e-15	1	1	25.2	0.254221
1609	tas_mrsos	2004	3552	0.00516919	1.60326e-15	1	1	26.3452	0.253982
1610	tas_mrsos	2004	3553	0.00380904	1.75244e-15	1	1	27.5037	0.253963
1611	tas_mrsos	2004	3554	0.00108566	1.09708e-15	1	1	28.6733	0.254291
1612	tas_mrsos	2004	3555	0.000587963	1.05384e-15	0	1	29.8082	0.253653
1613	tas_mrsos	2004	3556	0.000177063	8.06733e-16	0	1	30.9947	0.254263
1614	tas_mrsos	2004	3557	4.23942e-05	2.30036e-16	0	0	32.125	0.253625
1615	tas_mrsos	2004	3558	3.92546e-05	6.85481e-16	0	1	33.34	0.2536
1616	tas_mrsos	2004	357	-7.98667e-08	-2.55906e-17	0	0	-16.1	0.116
1617	tas_mrsos	2004	358	-7.98667e-08	-2.55906e-17	0	0	-14.8	0.114
1618	tas_mrsos	2004	3584	-1.81148e-07	-2.55906e-17	0	0	-31.15	0.2565
1619	tas_mrsos	2004	3592	-2.18362e-07	-2.55906e-17	0	0	-22.5	0.256
1620	tas_mrsos	2004	3594	3.75965e-08	3.93701e-18	0	0	-19.5	0.258
1621	tas_mrsos	2004	3595	3.75965e-08	3.93701e-18	0	0	-18.4	0.259
1622	tas_mrsos	2004	3596	-4.40654e-07	-2.55906e-17	0	0	-17.35	0.2575
1623	tas_mrsos	2004	3597	-6.72458e-07	-2.55906e-17	0	0	-16.4	0.257
1624	tas_mrsos	2004	3598	-2.01655e-06	-2.28903e-17	0	0	-15.06	0.2577
1625	tas_mrsos	2004	3599	-2.08981e-06	-2.55906e-17	0	0	-13.89	0.2569
1626	tas_mrsos	2004	3600	-7.86617e-07	-8.14589e-18	0	0	-12.6636	0.257636
1627	tas_mrsos	2004	3601	-4.49275e-08	-4.82328e-19	0	0	-11.6545	0.257545
1628	tas_mrsos	2004	3602	-1.39116e-06	-9.36284e-18	0	0	-10.5765	0.257824
1629	tas_mrsos	2004	3603	7.68323e-07	4.06841e-18	0	0	-9.33478	0.258087
1630	tas_mrsos	2004	3604	3.45581e-06	1.99744e-17	0	0	-8.13333	0.257714
1631	tas_mrsos	2004	3605	6.58885e-06	2.97223e-17	0	0	-6.84815	0.257444
1632	tas_mrsos	2004	3606	6.67996e-06	2.28768e-17	0	0	-5.81667	0.257917
1633	tas_mrsos	2004	3607	3.29887e-05	9.85219e-17	0	0	-4.57949	0.257667
1634	tas_mrsos	2004	3608	5.18858e-05	1.12854e-16	0	0	-3.42075	0.257434
1635	tas_mrsos	2004	3609	7.58455e-05	1.29565e-16	0	0	-2.27571	0.257543
1636	tas_mrsos	2004	3610	7.61849e-05	1.07841e-16	0	0	-1.00816	0.257684
1637	tas_mrsos	2004	3611	0.000161814	1.89373e-16	0	0	0.0981982	0.257757
1638	tas_mrsos	2004	3612	0.000245433	2.23075e-16	0	0	1.27342	0.257551
1639	tas_mrsos	2004	3613	0.000375783	3.17586e-16	0	0	2.38621	0.257572
1640	tas_mrsos	2004	3614	0.000326601	2.7764e-16	0	0	3.5327	0.257491
1641	tas_mrsos	2004	3615	0.000636033	4.63669e-16	0	1	4.75848	0.257667
1642	tas_mrsos	2004	3616	0.000786444	5.87445e-16	0	1	5.95864	0.257901
1643	tas_mrsos	2004	3617	0.00113856	7.66026e-16	1	1	7.06417	0.257642
1644	tas_mrsos	2004	3618	0.0017143	9.97507e-16	1	1	8.30176	0.257617
1645	tas_mrsos	2004	3619	0.0025432	1.20659e-15	1	1	9.44833	0.257576
1646	tas_mrsos	2004	3620	0.0034113	1.46392e-15	1	1	10.5963	0.257748
1647	tas_mrsos	2004	3621	0.00454536	1.58284e-15	1	1	11.7655	0.257547
1648	tas_mrsos	2004	3622	0.00479791	1.79907e-15	1	1	12.9168	0.257744
1649	tas_mrsos	2004	3623	0.00535102	1.99395e-15	1	1	14.1145	0.257778
1650	tas_mrsos	2004	3624	0.00559979	1.99173e-15	1	1	15.251	0.257644
1651	tas_mrsos	2004	3625	0.0060339	2.0215e-15	1	1	16.4368	0.257615
1652	tas_mrsos	2004	3626	0.00615838	2.1536e-15	1	1	17.5981	0.257741
1653	tas_mrsos	2004	3627	0.00651058	2.0798e-15	1	1	18.7454	0.257667
1654	tas_mrsos	2004	3628	0.0056493	1.84431e-15	1	1	19.919	0.257566
1655	tas_mrsos	2004	3629	0.00612967	1.74494e-15	1	1	21.1	0.25781
1656	tas_mrsos	2004	3630	0.00590991	1.63032e-15	1	1	22.2823	0.257581
1657	tas_mrsos	2004	3631	0.00450479	1.39332e-15	1	1	23.4159	0.257635
1658	tas_mrsos	2004	3632	0.00455852	1.32403e-15	1	1	24.6419	0.257721
1659	tas_mrsos	2004	3633	0.00574114	1.7157e-15	1	1	25.7536	0.257519
1660	tas_mrsos	2004	3634	0.00611689	2.00197e-15	1	1	26.9084	0.257618
1661	tas_mrsos	2004	3635	0.00188287	1.47227e-15	1	1	28.0811	0.257793
1662	tas_mrsos	2004	3636	0.00125945	1.59215e-15	1	1	29.171	0.257754
1663	tas_mrsos	2004	3637	0.000236247	5.63904e-16	0	1	30.3703	0.257541
1664	tas_mrsos	2004	3638	0.000154272	7.40766e-16	0	1	31.5333	0.257833
1665	tas_mrsos	2004	3639	4.34244e-05	5.40816e-16	0	1	32.6571	0.258143
1666	tas_mrsos	2004	3654	-9.05739e-08	-2.55906e-17	0	0	-43.6	0.26
1667	tas_mrsos	2004	3660	-9.05739e-08	-2.55906e-17	0	0	-37.2	0.261
1668	tas_mrsos	2004	3665	-9.05739e-08	-2.55906e-17	0	0	-30.9	0.262
1669	tas_mrsos	2004	367	9.42573e-07	9.25197e-17	0	0	-4.6	0.114
1670	tas_mrsos	2004	3673	4.05757e-08	3.93701e-18	0	0	-21.7	0.263
1671	tas_mrsos	2004	3674	-2.47799e-07	-2.55906e-17	0	0	-20.1	0.26
1672	tas_mrsos	2004	3675	-1.8803e-07	-1.01525e-17	0	0	-19.05	0.261
1673	tas_mrsos	2004	3677	-2.51144e-07	-2.55906e-17	0	0	-17.3	0.262
1674	tas_mrsos	2004	3678	-6.61777e-07	-1.36427e-17	0	0	-15.86	0.261
1675	tas_mrsos	2004	3679	-1.45367e-06	-1.60236e-17	0	0	-14.43	0.2609
1676	tas_mrsos	2004	3680	-2.24451e-06	-1.87422e-17	0	0	-13.3929	0.2615
1677	tas_mrsos	2004	3681	-2.41865e-06	-1.79941e-17	0	0	-12.1875	0.261313
1678	tas_mrsos	2004	3682	-3.16263e-07	-2.42689e-18	0	0	-11.0733	0.2608
1679	tas_mrsos	2004	3683	1.10972e-06	6.82901e-18	0	0	-9.86842	0.261474
1680	tas_mrsos	2004	3684	-3.49218e-07	-9.96441e-19	0	0	-8.65333	0.261533
1681	tas_mrsos	2004	3685	1.35398e-05	6.09772e-17	0	0	-7.68889	0.26137
1682	tas_mrsos	2004	3686	8.30894e-06	2.16889e-17	0	0	-6.32766	0.261128
1683	tas_mrsos	2004	3687	1.15107e-05	3.18259e-17	0	0	-5.22143	0.26131
1684	tas_mrsos	2004	3688	2.49701e-05	5.10108e-17	0	0	-4.00862	0.261345
1685	tas_mrsos	2004	3689	4.1735e-05	8.36455e-17	0	0	-2.81667	0.261067
1686	tas_mrsos	2004	369	3.55944e-06	1.77482e-16	0	0	-2.15	0.114
1687	tas_mrsos	2004	3690	0.000120867	1.75253e-16	0	0	-1.69024	0.26128
1688	tas_mrsos	2004	3691	0.000135268	1.55921e-16	0	0	-0.538136	0.26122
1689	tas_mrsos	2004	3692	0.000232833	2.20531e-16	0	0	0.661972	0.261162
1690	tas_mrsos	2004	3693	0.000308266	3.21409e-16	0	0	1.77222	0.26119
1691	tas_mrsos	2004	3694	0.000365282	3.41299e-16	0	0	2.94834	0.261238
1692	tas_mrsos	2004	3695	0.000510418	4.23441e-16	0	1	4.19074	0.261228
1693	tas_mrsos	2004	3696	0.000867963	5.88425e-16	1	1	5.36011	0.261149
1694	tas_mrsos	2004	3697	0.00111642	7.59407e-16	1	1	6.49848	0.26134
1695	tas_mrsos	2004	3698	0.00186504	1.01561e-15	1	1	7.64746	0.261186
1696	tas_mrsos	2004	3699	0.00269816	1.29208e-15	1	1	8.86742	0.261337
1697	tas_mrsos	2004	370	1.92736e-06	1.81102e-16	0	0	-1	0.113
1698	tas_mrsos	2004	3700	0.00310022	1.31342e-15	1	1	10.0284	0.261358
1699	tas_mrsos	2004	3701	0.00437792	1.70973e-15	1	1	11.1342	0.261161
1700	tas_mrsos	2004	3702	0.00459461	1.86309e-15	1	1	12.3062	0.26117
1701	tas_mrsos	2004	3703	0.00489293	1.86511e-15	1	1	13.5172	0.2614
1702	tas_mrsos	2004	3704	0.00650646	2.15942e-15	1	1	14.669	0.261181
1703	tas_mrsos	2004	3705	0.00747584	2.28182e-15	1	1	15.8578	0.261083
1704	tas_mrsos	2004	3706	0.00668152	2.18824e-15	1	1	17.0173	0.261279
1705	tas_mrsos	2004	3707	0.00664367	2.06701e-15	1	1	18.1561	0.26115
1706	tas_mrsos	2004	3708	0.00683456	1.95358e-15	1	1	19.3452	0.261246
1707	tas_mrsos	2004	3709	0.00571109	1.90906e-15	1	1	20.5299	0.261206
1708	tas_mrsos	2004	371	7.73339e-06	3.35421e-16	0	0	0.1	0.113667
1709	tas_mrsos	2004	3710	0.00660657	1.71906e-15	1	1	21.6684	0.26118
1710	tas_mrsos	2004	3711	0.00631406	1.6507e-15	1	1	22.8778	0.261159
1711	tas_mrsos	2004	3712	0.00495174	1.40031e-15	1	1	24.0387	0.26119
1712	tas_mrsos	2004	3713	0.00628068	1.55414e-15	1	1	25.1807	0.261185
1713	tas_mrsos	2004	3714	0.00575768	1.6559e-15	1	1	26.3162	0.261125
1714	tas_mrsos	2004	3715	0.00304179	1.46098e-15	1	1	27.5242	0.261236
1715	tas_mrsos	2004	3716	0.00150688	1.58478e-15	1	1	28.6561	0.261439
1716	tas_mrsos	2004	3717	0.000548281	1.2906e-15	0	1	29.7351	0.261054
1717	tas_mrsos	2004	3718	2.13852e-05	1.54373e-16	0	0	30.8167	0.260583
1718	tas_mrsos	2004	3719	0.000121739	6.21879e-16	0	1	32.1882	0.261588
1719	tas_mrsos	2004	372	1.58734e-05	1.83608e-16	0	0	1.45556	0.114222
1720	tas_mrsos	2004	373	1.55243e-05	1.40015e-16	0	0	2.41667	0.11475
1721	tas_mrsos	2004	374	2.55961e-05	2.3927e-16	0	0	3.50909	0.113818
1722	tas_mrsos	2004	375	7.80535e-05	3.20941e-16	0	0	4.775	0.114708
1723	tas_mrsos	2004	3751	-2.18362e-07	-2.55906e-17	0	0	-25.6	0.267
1724	tas_mrsos	2004	3752	-6.55085e-07	-2.55906e-17	0	0	-24.7333	0.264667
1725	tas_mrsos	2004	3753	-2.18362e-07	-2.55906e-17	0	0	-23	0.264
1726	tas_mrsos	2004	3754	-2.47799e-07	-2.55906e-17	0	0	-21.9	0.266
1727	tas_mrsos	2004	3756	-2.47799e-07	-2.55906e-17	0	0	-19.8	0.265
1728	tas_mrsos	2004	3757	-9.61759e-07	-2.55906e-17	0	0	-18.7	0.26425
1729	tas_mrsos	2004	3758	-9.69245e-07	-2.55906e-17	0	0	-17.6	0.26475
1730	tas_mrsos	2004	3759	-8.09199e-07	-2.55906e-17	0	0	-16.225	0.2645
1731	tas_mrsos	2004	376	0.000152693	4.64395e-16	0	1	5.84063	0.114469
1732	tas_mrsos	2004	3760	-5.79996e-07	-8.52123e-18	0	0	-14.975	0.264375
1733	tas_mrsos	2004	3761	-9.75517e-07	-1.04654e-17	0	0	-13.9545	0.264727
1734	tas_mrsos	2004	3762	-1.64203e-06	-1.30297e-17	0	0	-12.6875	0.265125
1735	tas_mrsos	2004	3763	-9.92351e-07	-6.29487e-18	0	0	-11.6105	0.264789
1736	tas_mrsos	2004	3764	2.45087e-07	1.61867e-18	0	0	-10.3222	0.264222
1737	tas_mrsos	2004	3765	3.31205e-06	2.40767e-17	0	0	-9.28824	0.265235
1738	tas_mrsos	2004	3766	1.3296e-05	3.93836e-17	0	0	-8.16341	0.265146
1739	tas_mrsos	2004	3767	6.56905e-06	2.03114e-17	0	0	-6.92	0.2649
1740	tas_mrsos	2004	3768	2.39822e-05	5.49313e-17	0	0	-5.77407	0.265037
1741	tas_mrsos	2004	3769	2.01243e-05	4.17997e-17	0	0	-4.57377	0.264836
1742	tas_mrsos	2004	377	0.000129992	3.73053e-16	0	0	7.15455	0.114273
1743	tas_mrsos	2004	3770	3.36894e-05	6.70382e-17	0	0	-3.46897	0.264879
1744	tas_mrsos	2004	3771	0.00010539	1.38869e-16	0	0	-2.17253	0.264736
1745	tas_mrsos	2004	3772	0.000110716	1.42419e-16	0	0	-1.08557	0.264897
1746	tas_mrsos	2004	3773	0.000220576	2.127e-16	0	0	0.0792593	0.264867
1747	tas_mrsos	2004	3774	0.000286008	2.45358e-16	0	0	1.30303	0.264842
1748	tas_mrsos	2004	3775	0.00033576	3.33945e-16	0	0	2.41259	0.265067
1749	tas_mrsos	2004	3776	0.000524002	4.32544e-16	0	1	3.57284	0.264759
1750	tas_mrsos	2004	3777	0.000689786	5.0349e-16	0	1	4.73164	0.264802
1751	tas_mrsos	2004	3778	0.000999802	6.90185e-16	1	1	5.92065	0.264842
1752	tas_mrsos	2004	3779	0.00154507	8.46702e-16	1	1	7.06917	0.264854
1753	tas_mrsos	2004	378	0.000208883	4.29856e-16	0	1	8.23556	0.114
1754	tas_mrsos	2004	3780	0.00261327	1.18482e-15	1	1	8.25567	0.264993
1755	tas_mrsos	2004	3781	0.00298803	1.28234e-15	1	1	9.41054	0.264888
1756	tas_mrsos	2004	3782	0.00413438	1.48251e-15	1	1	10.5561	0.26487
1757	tas_mrsos	2004	3783	0.00458737	1.71192e-15	1	1	11.7421	0.264751
1758	tas_mrsos	2004	3784	0.00450564	1.74626e-15	1	1	12.9388	0.26486
1759	tas_mrsos	2004	3785	0.00581311	1.98821e-15	1	1	14.0853	0.264946
1760	tas_mrsos	2004	3786	0.00765675	2.02776e-15	1	1	15.2262	0.26483
1761	tas_mrsos	2004	3787	0.00664936	2.18218e-15	1	1	16.4436	0.264743
1762	tas_mrsos	2004	3788	0.00681177	2.24973e-15	1	1	17.5816	0.264747
1763	tas_mrsos	2004	3789	0.00667812	2.06423e-15	1	1	18.7357	0.26477
1764	tas_mrsos	2004	379	0.000237772	4.07799e-16	0	1	9.37222	0.114333
1765	tas_mrsos	2004	3790	0.00631074	1.87259e-15	1	1	19.9587	0.264871
1766	tas_mrsos	2004	3791	0.00552597	1.76582e-15	1	1	21.1061	0.265022
1767	tas_mrsos	2004	3792	0.00647591	1.76754e-15	1	1	22.2738	0.264805
1768	tas_mrsos	2004	3793	0.00715135	1.72223e-15	1	1	23.423	0.264759
1769	tas_mrsos	2004	3794	0.00493785	1.36602e-15	1	1	24.6093	0.26484
1770	tas_mrsos	2004	3795	0.00692528	1.66033e-15	1	1	25.7258	0.264764
1771	tas_mrsos	2004	3796	0.00570319	2.01295e-15	1	1	26.895	0.264745
1772	tas_mrsos	2004	3797	0.00183136	1.5485e-15	1	1	28.0559	0.264882
1773	tas_mrsos	2004	3798	0.000835882	1.72753e-15	1	1	29.1952	0.264571
1774	tas_mrsos	2004	3799	0.000370118	1.24765e-15	0	1	30.4077	0.264692
1775	tas_mrsos	2004	380	0.000248599	3.53958e-16	0	0	10.5182	0.114394
1776	tas_mrsos	2004	3800	0.000126163	6.16194e-16	0	1	31.7056	0.264944
1777	tas_mrsos	2004	3801	8.85323e-06	7.71654e-16	0	1	32.3	0.264
1778	tas_mrsos	2004	381	0.000307028	4.20491e-16	0	1	11.7588	0.114676
1779	tas_mrsos	2004	382	0.000375103	4.55789e-16	0	1	12.9519	0.114416
1780	tas_mrsos	2004	383	0.00077241	5.92974e-16	0	1	14.1331	0.114215
1781	tas_mrsos	2004	3832	-2.18362e-07	-2.55906e-17	0	0	-24.7	0.267
1782	tas_mrsos	2004	3837	-4.88679e-07	-2.55906e-17	0	0	-19.35	0.269
1783	tas_mrsos	2004	3839	-1.99185e-07	-1.05075e-17	0	0	-16.7	0.268
1784	tas_mrsos	2004	384	0.000573888	4.40973e-16	0	1	15.2683	0.114392
1785	tas_mrsos	2004	3840	-1.03692e-06	-2.01812e-17	0	0	-16.0167	0.2685
1786	tas_mrsos	2004	3841	-8.21984e-07	-1.24389e-17	0	0	-14.5375	0.2685
1787	tas_mrsos	2004	3842	-1.21235e-06	-2.08756e-17	0	0	-13.3	0.268714
1788	tas_mrsos	2004	3843	-2.55103e-06	-1.58359e-17	0	0	-12.1895	0.268579
1789	tas_mrsos	2004	3844	-3.55302e-07	-3.40448e-18	0	0	-11.0917	0.268167
1790	tas_mrsos	2004	3845	-3.70997e-07	-2.05281e-18	0	0	-9.78636	0.268273
1791	tas_mrsos	2004	3846	2.06772e-06	1.01119e-17	0	0	-8.62308	0.268962
1792	tas_mrsos	2004	3847	5.5828e-06	1.29854e-17	0	0	-7.54444	0.268611
1793	tas_mrsos	2004	3848	9.66784e-06	2.35688e-17	0	0	-6.37451	0.268255
1794	tas_mrsos	2004	3849	1.07995e-05	3.4491e-17	0	0	-5.25128	0.268513
1795	tas_mrsos	2004	385	0.000684252	4.16843e-16	0	1	16.4907	0.11422
1796	tas_mrsos	2004	3850	3.10451e-05	5.35148e-17	0	0	-4.05634	0.268169
1797	tas_mrsos	2004	3851	6.35266e-05	8.88422e-17	0	0	-2.87229	0.26841
1798	tas_mrsos	2004	3852	0.000130309	1.99145e-16	0	0	-1.65765	0.268635
1799	tas_mrsos	2004	3853	0.000160181	1.77984e-16	0	0	-0.511382	0.268545
1800	tas_mrsos	2004	3854	0.000256385	2.20092e-16	0	0	0.609259	0.268543
1801	tas_mrsos	2004	3855	0.00031155	2.97388e-16	0	0	1.84375	0.268347
1802	tas_mrsos	2004	3856	0.000485419	4.77641e-16	0	1	2.94333	0.268553
1803	tas_mrsos	2004	3857	0.000570312	4.7989e-16	0	1	4.1828	0.268484
1804	tas_mrsos	2004	3858	0.00083477	6.57077e-16	1	1	5.3475	0.268519
1805	tas_mrsos	2004	3859	0.0010901	7.17779e-16	1	1	6.51856	0.268376
1806	tas_mrsos	2004	386	0.000677748	4.35544e-16	0	1	17.6133	0.11414
1807	tas_mrsos	2004	3860	0.00245882	1.14513e-15	1	1	7.69926	0.26852
1808	tas_mrsos	2004	3861	0.00265083	1.253e-15	1	1	8.85556	0.26851
1809	tas_mrsos	2004	3862	0.00310495	1.4286e-15	1	1	9.9777	0.268493
1810	tas_mrsos	2004	3863	0.00466234	1.64942e-15	1	1	11.15	0.268322
1811	tas_mrsos	2004	3864	0.00460535	1.72788e-15	1	1	12.3699	0.268383
1812	tas_mrsos	2004	3865	0.00510394	2.00836e-15	1	1	13.5016	0.268379
1813	tas_mrsos	2004	3866	0.00695767	2.16936e-15	1	1	14.6828	0.268386
1814	tas_mrsos	2004	3867	0.00727902	2.32058e-15	1	1	15.8329	0.268372
1815	tas_mrsos	2004	3868	0.00606988	2.21149e-15	1	1	16.9681	0.268337
1816	tas_mrsos	2004	3869	0.00567436	2.21532e-15	1	1	18.1122	0.268456
1817	tas_mrsos	2004	387	0.000981894	4.83701e-16	1	1	18.8	0.114391
1818	tas_mrsos	2004	3870	0.00640758	2.10895e-15	1	1	19.3484	0.268408
1819	tas_mrsos	2004	3871	0.00644394	2.00321e-15	1	1	20.5295	0.268494
1820	tas_mrsos	2004	3872	0.00543181	1.85612e-15	1	1	21.6793	0.268422
1821	tas_mrsos	2004	3873	0.0064787	1.81495e-15	1	1	22.8514	0.268449
1822	tas_mrsos	2004	3874	0.0066729	1.66441e-15	1	1	24.0467	0.268413
1823	tas_mrsos	2004	3875	0.00564406	1.71969e-15	1	1	25.1654	0.268525
1824	tas_mrsos	2004	3876	0.00634187	1.72319e-15	1	1	26.3006	0.268406
1825	tas_mrsos	2004	3877	0.00285218	1.69214e-15	1	1	27.5352	0.268359
1826	tas_mrsos	2004	3878	0.00116172	1.65304e-15	1	1	28.6902	0.268311
1827	tas_mrsos	2004	3879	0.000382279	1.37982e-15	0	1	29.8292	0.268458
1828	tas_mrsos	2004	388	0.00138088	5.16486e-16	1	1	19.9829	0.114475
1829	tas_mrsos	2004	3880	0.000145841	7.49225e-16	0	1	31.1059	0.267941
1830	tas_mrsos	2004	3881	9.42335e-06	2.88675e-16	0	0	31.9	0.268667
1831	tas_mrsos	2004	389	0.00141477	4.33254e-16	1	1	21.1038	0.114244
1832	tas_mrsos	2004	390	0.00178581	4.59663e-16	1	1	22.2617	0.114415
1833	tas_mrsos	2004	391	0.0018019	3.92062e-16	1	1	23.4788	0.114303
1834	tas_mrsos	2004	3912	-2.14363e-07	-2.55906e-17	0	0	-26.5	0.273
1835	tas_mrsos	2004	3914	-2.14363e-07	-2.55906e-17	0	0	-24.5	0.272
1836	tas_mrsos	2004	3918	-6.43088e-07	-2.55906e-17	0	0	-19.6333	0.272
1837	tas_mrsos	2004	392	0.000940373	2.33729e-16	1	0	24.5559	0.114301
1838	tas_mrsos	2004	3920	-4.6523e-07	-1.60199e-17	0	0	-17.4	0.272667
1839	tas_mrsos	2004	3921	-8.93199e-07	-2.55906e-17	0	0	-16.35	0.27175
1840	tas_mrsos	2004	3922	-1.1126e-06	-1.71087e-17	0	0	-14.9625	0.27275
1841	tas_mrsos	2004	3923	-2.01224e-06	-1.40829e-17	0	0	-13.8706	0.272294
1842	tas_mrsos	2004	3924	-1.53604e-06	-2.22195e-17	0	0	-12.7778	0.272222
1843	tas_mrsos	2004	3925	-3.08369e-06	-1.6726e-17	0	0	-11.687	0.271913
1844	tas_mrsos	2004	3926	1.52992e-07	7.40857e-19	0	0	-10.424	0.27248
1845	tas_mrsos	2004	3927	9.53245e-07	3.79076e-18	0	0	-9.28065	0.271968
1846	tas_mrsos	2004	3928	5.90094e-06	2.12178e-17	0	0	-8.01765	0.271882
1847	tas_mrsos	2004	3929	1.94775e-06	3.49789e-18	0	0	-6.93944	0.271845
1848	tas_mrsos	2004	393	0.000722464	1.81203e-16	0	0	25.7729	0.114367
1849	tas_mrsos	2004	3930	2.43244e-05	4.82233e-17	0	0	-5.70333	0.272033
1850	tas_mrsos	2004	3931	3.07167e-05	6.00567e-17	0	0	-4.58033	0.272016
1851	tas_mrsos	2004	3932	6.89305e-05	9.16422e-17	0	0	-3.45227	0.272011
1852	tas_mrsos	2004	3933	9.3665e-05	1.15485e-16	0	0	-2.20388	0.27201
1853	tas_mrsos	2004	3934	0.000133829	1.65971e-16	0	0	-1.08641	0.271913
1854	tas_mrsos	2004	3935	0.000283744	2.35057e-16	0	0	0.0689024	0.271933
1855	tas_mrsos	2004	3936	0.000233752	2.32235e-16	0	0	1.28603	0.271919
1856	tas_mrsos	2004	3937	0.000306288	3.2556e-16	0	0	2.4375	0.271914
1857	tas_mrsos	2004	3938	0.000537389	3.93564e-16	0	1	3.58777	0.271979
1858	tas_mrsos	2004	3939	0.00108086	6.85006e-16	1	1	4.77225	0.272053
1859	tas_mrsos	2004	394	0.000207924	6.45061e-17	0	0	26.9287	0.114325
1860	tas_mrsos	2004	3940	0.00123163	8.86525e-16	1	1	5.90172	0.272046
1861	tas_mrsos	2004	3941	0.00198048	1.09841e-15	1	1	7.09913	0.2721
1862	tas_mrsos	2004	3942	0.00291415	1.2216e-15	1	1	8.26181	0.271961
1863	tas_mrsos	2004	3943	0.00322685	1.38927e-15	1	1	9.36333	0.272037
1864	tas_mrsos	2004	3944	0.00443491	1.63156e-15	1	1	10.5261	0.272092
1865	tas_mrsos	2004	3945	0.00535888	1.94499e-15	1	1	11.7666	0.272138
1866	tas_mrsos	2004	3946	0.0051192	2.02509e-15	1	1	12.9512	0.2719
1867	tas_mrsos	2004	3947	0.00520041	2.0858e-15	1	1	14.0706	0.271935
1868	tas_mrsos	2004	3948	0.00728074	2.25807e-15	1	1	15.2431	0.272003
1869	tas_mrsos	2004	3949	0.0061709	2.20814e-15	1	1	16.4551	0.272039
1870	tas_mrsos	2004	395	-0.000169807	-5.48961e-17	0	0	28.1147	0.114238
1871	tas_mrsos	2004	3950	0.00603205	2.26577e-15	1	1	17.5752	0.272013
1872	tas_mrsos	2004	3951	0.0063346	2.32871e-15	1	1	18.7805	0.271997
1873	tas_mrsos	2004	3952	0.00622949	1.96579e-15	1	1	19.9748	0.271917
1874	tas_mrsos	2004	3953	0.00531999	1.85439e-15	1	1	21.0778	0.271957
1875	tas_mrsos	2004	3954	0.00670805	1.68917e-15	1	1	22.2641	0.271981
1876	tas_mrsos	2004	3955	0.0058997	1.64613e-15	1	1	23.4506	0.272006
1877	tas_mrsos	2004	3956	0.00594771	1.56107e-15	1	1	24.6034	0.271925
1878	tas_mrsos	2004	3957	0.00734555	2.01016e-15	1	1	25.7416	0.271974
1879	tas_mrsos	2004	3958	0.00452154	2.02521e-15	1	1	26.8529	0.271926
1880	tas_mrsos	2004	3959	0.00171634	1.88273e-15	1	1	28.0346	0.271885
1881	tas_mrsos	2004	396	-8.12857e-05	-2.51651e-17	0	0	29.2512	0.114159
1882	tas_mrsos	2004	3960	0.000801912	1.33887e-15	0	1	29.1827	0.271981
1883	tas_mrsos	2004	3961	0.000311535	1.37004e-15	0	1	30.3	0.27195
1884	tas_mrsos	2004	3962	2.7084e-05	8.19705e-16	0	1	31.8333	0.272333
1885	tas_mrsos	2004	397	-0.000402653	-1.35777e-16	0	0	30.4108	0.11435
1886	tas_mrsos	2004	398	-4.1721e-05	-2.05096e-17	0	0	31.5815	0.114253
1887	tas_mrsos	2004	399	5.69881e-05	4.40768e-17	0	0	32.7504	0.11415
1888	tas_mrsos	2004	3990	-1.97705e-07	-2.55906e-17	0	0	-29.3	0.276
1889	tas_mrsos	2004	3991	-2.01966e-07	-2.55906e-17	0	0	-28.8	0.275
1890	tas_mrsos	2004	3993	-8.2433e-07	-2.55906e-17	0	0	-25.95	0.27525
1891	tas_mrsos	2004	3994	-2.06164e-07	-2.55906e-17	0	0	-24.5	0.276
1892	tas_mrsos	2004	3995	-2.10296e-07	-2.55906e-17	0	0	-24	0.275
1893	tas_mrsos	2004	3996	-2.01966e-07	-2.55906e-17	0	0	-23	0.276
1894	tas_mrsos	2004	3997	-2.06164e-07	-2.55906e-17	0	0	-21.6	0.276
1895	tas_mrsos	2004	3998	-9.60426e-07	-4.0294e-17	0	0	-20.1	0.275667
1896	tas_mrsos	2004	400	-0.000152082	-2.00261e-16	0	0	33.9119	0.114299
1897	tas_mrsos	2004	4000	-6.34585e-07	-1.35952e-17	0	0	-17.86	0.2748
1898	tas_mrsos	2004	4001	-9.04318e-07	-2.55906e-17	0	0	-16.775	0.2755
1899	tas_mrsos	2004	4002	-6.56078e-07	-1.48801e-17	0	0	-15.82	0.275
1900	tas_mrsos	2004	4003	-3.04869e-06	-2.75147e-17	0	0	-14.5929	0.275286
1901	tas_mrsos	2004	4004	1.13064e-07	1.49592e-18	0	0	-13.4111	0.275667
1902	tas_mrsos	2004	4005	-2.74931e-06	-2.55906e-17	0	0	-12.3357	0.275143
1903	tas_mrsos	2004	4006	-2.61488e-06	-1.31747e-17	0	0	-10.9833	0.276125
1904	tas_mrsos	2004	4007	-1.1382e-06	-4.38391e-18	0	0	-9.87419	0.275516
1905	tas_mrsos	2004	4008	1.33898e-06	5.82679e-18	0	0	-8.65862	0.275517
1906	tas_mrsos	2004	4009	3.80483e-06	1.00399e-17	0	0	-7.48519	0.275352
1907	tas_mrsos	2004	401	-2.30828e-05	-4.83028e-17	0	0	35.0857	0.11431
1908	tas_mrsos	2004	4010	1.50429e-05	3.18544e-17	0	0	-6.28871	0.275355
1909	tas_mrsos	2004	4011	2.87697e-05	6.82084e-17	0	0	-5.18846	0.275288
1910	tas_mrsos	2004	4012	0.000103131	1.51604e-16	0	0	-4.0075	0.275487
1911	tas_mrsos	2004	4013	7.516e-05	1.11082e-16	0	0	-2.79881	0.275464
1912	tas_mrsos	2004	4014	0.000110686	1.70947e-16	0	0	-1.69286	0.275524
1913	tas_mrsos	2004	4015	0.000110151	1.36933e-16	0	0	-0.431193	0.275899
1914	tas_mrsos	2004	4016	0.000270002	2.73911e-16	0	0	0.705224	0.275642
1915	tas_mrsos	2004	4017	0.000293594	3.06475e-16	0	0	1.83846	0.275446
1916	tas_mrsos	2004	4018	0.00037752	3.37222e-16	0	0	2.96364	0.275403
1917	tas_mrsos	2004	4019	0.000698818	4.87907e-16	0	1	4.15842	0.275532
1918	tas_mrsos	2004	402	2.78561e-05	6.98158e-17	0	0	36.2917	0.114028
1919	tas_mrsos	2004	4020	0.00145041	8.18176e-16	1	1	5.39432	0.275472
1920	tas_mrsos	2004	4021	0.00144228	8.99317e-16	1	1	6.50755	0.275552
1921	tas_mrsos	2004	4022	0.00236926	1.20849e-15	1	1	7.67109	0.275609
1922	tas_mrsos	2004	4023	0.00321611	1.42266e-15	1	1	8.83467	0.27564
1923	tas_mrsos	2004	4024	0.00319686	1.43707e-15	1	1	9.98862	0.275503
1924	tas_mrsos	2004	4025	0.00426379	1.63678e-15	1	1	11.1702	0.275587
1925	tas_mrsos	2004	4026	0.00509708	1.84322e-15	1	1	12.3561	0.275653
1926	tas_mrsos	2004	4027	0.00471894	1.95918e-15	1	1	13.5149	0.275551
1927	tas_mrsos	2004	4028	0.00655004	2.34811e-15	1	1	14.6522	0.275585
1928	tas_mrsos	2004	4029	0.00611289	2.28012e-15	1	1	15.8509	0.275582
1929	tas_mrsos	2004	403	-3.91614e-05	-1.76703e-16	0	0	37.46	0.1144
1930	tas_mrsos	2004	4030	0.00515607	2.22845e-15	1	1	16.9794	0.275521
1931	tas_mrsos	2004	4031	0.00442958	2.16018e-15	1	1	18.1401	0.275477
1932	tas_mrsos	2004	4032	0.00577775	2.12929e-15	1	1	19.3503	0.275583
1933	tas_mrsos	2004	4033	0.00588471	2.01737e-15	1	1	20.4783	0.275597
1934	tas_mrsos	2004	4034	0.00673626	1.9837e-15	1	1	21.6607	0.275565
1935	tas_mrsos	2004	4035	0.00570193	1.85898e-15	1	1	22.826	0.275597
1936	tas_mrsos	2004	4036	0.00744406	1.73402e-15	1	1	24.0206	0.275561
1937	tas_mrsos	2004	4037	0.00812271	1.93118e-15	1	1	25.148	0.275461
1938	tas_mrsos	2004	4038	0.00534905	1.86297e-15	1	1	26.2984	0.275564
1939	tas_mrsos	2004	4039	0.00223587	1.56498e-15	1	1	27.4935	0.275379
1940	tas_mrsos	2004	404	-2.71028e-05	-3.51586e-16	0	0	38.4	0.114429
1941	tas_mrsos	2004	4040	0.000758339	1.39515e-15	0	1	28.6574	0.275511
1942	tas_mrsos	2004	4041	0.000172953	8.44067e-16	0	1	29.8111	0.2755
1943	tas_mrsos	2004	4042	2.90016e-05	3.69685e-16	0	0	30.9714	0.275286
1944	tas_mrsos	2004	405	-2.23946e-06	-2.02756e-16	0	0	39.6	0.116
1945	tas_mrsos	2004	4073	-1.93381e-07	-2.55906e-17	0	0	-28.1	0.28
1946	tas_mrsos	2004	4074	-2.06164e-07	-2.55906e-17	0	0	-26.6	0.278
1947	tas_mrsos	2004	4075	-4.07744e-07	-2.55906e-17	0	0	-25.55	0.279
1948	tas_mrsos	2004	4076	-4.5874e-07	-2.55906e-17	0	0	-24.35	0.2795
1949	tas_mrsos	2004	4077	-6.48881e-07	-2.55906e-17	0	0	-23.0333	0.279667
1950	tas_mrsos	2004	4079	-2.63742e-07	-2.55906e-17	0	0	-20.5	0.278
1951	tas_mrsos	2004	4080	-4.65507e-07	-2.55906e-17	0	0	-19.45	0.279
1952	tas_mrsos	2004	4081	-2.06164e-07	-2.55906e-17	0	0	-18.9	0.279
1953	tas_mrsos	2004	4082	-8.94726e-07	-2.55906e-17	0	0	-17.425	0.27825
1954	tas_mrsos	2004	4083	-2.06781e-07	-1.08268e-17	0	0	-16.4	0.279
1955	tas_mrsos	2004	4084	-2.12764e-06	-2.82821e-17	0	0	-15.1222	0.278778
1956	tas_mrsos	2004	4085	-3.69397e-06	-2.55906e-17	0	0	-13.9765	0.278882
1957	tas_mrsos	2004	4086	-2.19521e-06	-2.55906e-17	0	0	-12.82	0.2792
1958	tas_mrsos	2004	4087	-7e-07	-5.61596e-18	0	0	-11.6937	0.279125
1959	tas_mrsos	2004	4088	-9.70206e-07	-3.03371e-18	0	0	-10.3683	0.278902
1960	tas_mrsos	2004	4089	-4.82837e-06	-1.7301e-17	0	0	-9.22778	0.279417
1961	tas_mrsos	2004	4090	1.65941e-06	6.02217e-18	0	0	-8.175	0.279111
1962	tas_mrsos	2004	4091	5.05305e-06	1.2718e-17	0	0	-6.92549	0.279118
1963	tas_mrsos	2004	4092	2.34507e-05	4.41302e-17	0	0	-5.68615	0.279323
1964	tas_mrsos	2004	4093	4.30834e-05	7.27743e-17	0	0	-4.56528	0.279042
1965	tas_mrsos	2004	4094	7.60632e-05	1.48655e-16	0	0	-3.47333	0.279233
1966	tas_mrsos	2004	4095	7.73172e-05	1.11574e-16	0	0	-2.225	0.279228
1967	tas_mrsos	2004	4096	0.000124516	1.76333e-16	0	0	-1.12021	0.279074
1968	tas_mrsos	2004	4097	0.000202695	2.25795e-16	0	0	0.005	0.279183
1969	tas_mrsos	2004	4098	0.000299433	2.9885e-16	0	0	1.24328	0.279075
1970	tas_mrsos	2004	4099	0.000367783	3.8217e-16	0	1	2.39762	0.27904
1971	tas_mrsos	2004	4100	0.000452809	3.71151e-16	0	0	3.51951	0.279079
1972	tas_mrsos	2004	4101	0.000999275	6.87586e-16	1	1	4.76823	0.279161
1973	tas_mrsos	2004	4102	0.001405	7.98659e-16	1	1	5.90472	0.279137
1974	tas_mrsos	2004	4103	0.00249033	1.17933e-15	1	1	7.04874	0.279245
1975	tas_mrsos	2004	4104	0.00270762	1.22131e-15	1	1	8.27	0.279231
1976	tas_mrsos	2004	4105	0.00349	1.45615e-15	1	1	9.4028	0.279127
1977	tas_mrsos	2004	4106	0.00425712	1.50348e-15	1	1	10.5668	0.279168
1978	tas_mrsos	2004	4107	0.00548046	1.84454e-15	1	1	11.7357	0.279112
1979	tas_mrsos	2004	4108	0.00579172	2.05204e-15	1	1	12.9615	0.279099
1980	tas_mrsos	2004	4109	0.00613471	2.29457e-15	1	1	14.1116	0.27903
1981	tas_mrsos	2004	4110	0.00570591	2.15554e-15	1	1	15.2601	0.279187
1982	tas_mrsos	2004	4111	0.00514018	2.23679e-15	1	1	16.4308	0.279274
1983	tas_mrsos	2004	4112	0.00434178	2.1566e-15	1	1	17.5504	0.27909
1984	tas_mrsos	2004	4113	0.00573124	2.16645e-15	1	1	18.757	0.279123
1985	tas_mrsos	2004	4114	0.00696656	2.26523e-15	1	1	19.9473	0.279142
1986	tas_mrsos	2004	4115	0.00522995	1.87286e-15	1	1	21.0952	0.278993
1987	tas_mrsos	2004	4116	0.00607683	1.87058e-15	1	1	22.2826	0.279238
1988	tas_mrsos	2004	4117	0.00795105	1.79163e-15	1	1	23.4525	0.279222
1989	tas_mrsos	2004	4118	0.00822424	1.98446e-15	1	1	24.6014	0.279142
1990	tas_mrsos	2004	4119	0.00681463	1.80662e-15	1	1	25.7116	0.279239
1991	tas_mrsos	2004	4120	0.00397318	1.89796e-15	1	1	26.89	0.279172
1992	tas_mrsos	2004	4121	0.00144793	1.63614e-15	1	1	28.0286	0.279143
1993	tas_mrsos	2004	4122	0.000561011	1.41975e-15	0	1	29.1206	0.279147
1994	tas_mrsos	2004	4123	3.63152e-05	6.36778e-16	0	1	30.12	0.2786
1995	tas_mrsos	2004	4124	1.51049e-05	4.53972e-16	0	1	31.5333	0.278333
1996	tas_mrsos	2004	4150	-3.99671e-07	-2.55906e-17	0	0	-32.25	0.282
1997	tas_mrsos	2004	4153	-2.06164e-07	-2.55906e-17	0	0	-28	0.283
1998	tas_mrsos	2004	4155	-6.30823e-07	-2.55906e-17	0	0	-26.0333	0.282333
1999	tas_mrsos	2004	4157	-2.10296e-07	-2.55906e-17	0	0	-23.7	0.284
[truncated: 149,329 more rows]
