# Supplementary material for: Suitable Days for Plant Growth Disappear under Projected Climate Change: Potential Human and Biotic Vulnerability
Source: PLoS Biol. 2015 Jun 10;13(6):e1002167. doi: 10.1371/journal.pbio.1002167 (PMC4465630; doi:10.1371/journal.pbio.1002167)
Supplement: S4 Data — (XLS) [file pbio.1002167.s004.xls]

## Sheet: Sheet1
This are the data shown in Figure 5.
Country	Dependency (cumulative % of 3 metrics) 2012	Adaptability GDP 2012 (US Dollars)	Population 2012	Exposure (change in suitable days) RCP 2.6	Exposure (change in suitable days) RCP 4.5	Exposure (change in suitable days) RCP 8.5	Historic number of days
Brunei Darussalam	18.0997	55300	415717	-4.07045	-35.1346	-168.567	313.7
Singapore	100	61400	5460302	-10.5388	-53.1385	-164.342	287.462
Malaysia	76.7322	17200	29628392	-2.96629	-34.8835	-162.545	303.772
Equatorial Guinea	88.0043	26400	704001	-4.53776	-15.9485	-116.544	325.042
Cambodia	100	2400	15205539	-0.352962	-31.3038	-113.093	292.287
Indonesia	100	5100	251160124	-3.07112	-22.162	-106.383	242.257
Thailand	93.2801	10300	67448120	-2.66369	-25.2295	-96.4925	296.191
Panama	32.0588	15900	3559408	-2.41285	-18.9498	-92.6713	293.274
Brazil	32.2482	12100	201009622	-7.40961	-26.9308	-88.8468	304.092
Liberia	100	700	3989703	-5.64654	-11.7741	-88.3658	321.452
Gabon	67.9398	16800	1640286	-0.616774	-10.56	-87.6561	324.356
Sierra Leone	100	1400	5612685	-7.11881	-14.7997	-86.2168	315.97
Congo DRC	100	400	75507308	-4.90293	-14.4355	-83.9967	339.603
Colombia	36.3456	11000	45745783	-1.97489	-18.6494	-83.5825	276.489
Paraguay	47.9864	6200	6623252	-21.2755	-28.4638	-82.1031	306.834
South Sudan	92.2759	1000	11090104	-2.96303	-15.9463	-80.1038	313.657
Guyana	22.3568	8100	739903	0.848671	-21.3638	-78.1028	310.981
Suriname	18.9273	12600	566846	8.03864	-20.2577	-77.3429	301.079
Philippines	100	4500	105720644	0.870665	-22.4066	-76.8695	221.036
French Guiana	23.2743	20904	239450	8.98314	-12.8857	-72.447	317.063
Bangladesh	100	2100	163654860	-3.99553	-28.1236	-72.3516	297.184
Central African Republic	100	800	5166510	-0.594483	-10.2515	-71.2363	325.157
Ivory Coast	100	1800	22400835	5.78786	-10.7306	-70.7525	299.009
Congo	42.8935	4700	4492689	-3.35273	-13.0011	-66.2384	326.122
Venezuela	15.1157	13800	28459085	-2.28871	-16.5142	-64.9236	288.92
Papua New Guinea	100	2800	6431902	-0.515818	-14.1212	-64.5872	206.34
Costa Rica	83.7227	12800	4695942	-5.93808	-12.879	-64.3182	307.513
Vietnam	100	3600	92477857	-3.50021	-16.4921	-62.5227	280.222
Laos	100	3100	6695166	-0.818776	-14.8754	-62.205	304.632
Cameroon	100	2400	20549221	-2.78475	-9.02284	-61.9631	318.15
Nicaragua	60.5276	4500	5788531	-13.8572	-24.1654	-58.9465	268.996
Myanmar	100	1400	55167330	3.5801	-12.7064	-57.695	291.111
Ghana	100	3400	25199609	10.4513	-11.2985	-56.0042	253.708
Bolivia	44.0326	5200	10461053	-12.2449	-15.9623	-55.3616	308.408
Guinea	100	1100	11176026	5.49594	-11.9462	-54.1626	264.99
El Salvador	100	7600	6108590	-6.92296	-16.0769	-53.9058	284.257
Timor-Leste	100	10000	1172390	-2.22857	-12.6929	-53.3143	269.45
Guatemala	88.2186	5300	14373472	-4.55031	-16.1481	-52.6929	305.654
Sri Lanka	100	6200	21675648	4.39927	-10.3276	-52.1513	235.64
Honduras	68.4548	4700	8448465	-8.37204	-21.1395	-49.5152	255.233
Belize	32.6843	8900	334297	0.931341	-17.9483	-48.4042	272.113
Hong Kong	100	52300	7182724	-1.71294	-12.6077	-47.4077	323.904
Peru	30.2494	10900	29849303	0.262361	-12.1849	-44.8153	300.725
India	100	3900	1220800359	1.03484	-12.8781	-43.6627	240.907
Gaza strip	10.4	4549	1763387	-19.8175	-20.2385	-42.8	146.654
Malawi	100	900	16777547	-1.39754	-17.2391	-39.3672	310.055
Mozambique	100	1200	24096669	-3.44054	-18.8779	-39.2202	266.386
Zimbabwe	97.7577	600	13182908	-11.9845	-20.0472	-37.2698	254.295
Nigeria	100	2800	174507539	7.34306	-11.8936	-36.961	224.568
Togo	100	1100	7154237	10.3348	-10.184	-36.2722	236.234
Cuba	39.9886	10200	11061886	0.0151515	-11.803	-35.5	307.092
Botswana	48.3011	17100	2127825	2.37772	-22.2832	-34.8401	166.095
Morocco	82.7985	5400	32649130	-5.16365	-12.9145	-33.7513	175.496
West Bank	100	2900	2676740	-8.17308	-11.9846	-33.5385	212.773
Ecuador	60.0152	10200	15439429	13.7044	1.02821	-32.4511	288.087
Zambia	100	1700	14222233	-5.2965	-15.6042	-32.3908	284.113
Trinidad and Tobago	52.745	20400	1225225	5.57517	-14.7115	-32.1038	200.638
Djibouti	65.5686	2700	792198	6.02498	-7.94835	-30.5495	224.552
Syria	91.2329	5100	22457336	1.35761	-8.3871	-30.2923	251.095
Madagascar	100	1000	22599098	-10.1722	-12.7979	-30.134	253.824
Taiwan	100	39400	23299716	4.19583	0.45	-30.025	259.204
Benin	100	1700	9877292	14.0017	-11.0437	-29.996	212.349
Angola	97.3322	6500	18565269	-0.233951	-10.5548	-29.944	247.43
South Africa	24.3826	11600	48601098	-1.5769	-16.4885	-29.7886	240.385
Namibia	27.0009	7900	2182852	1.18506	-17.9846	-27.9062	150.21
Lebanon	100	16000	4131583	-1.76958	-7.42115	-27.4346	270.642
Jordan	100	6100	6482081	-3.64571	-5.96356	-26.9356	176.575
Portugal	84.576	23800	10799270	-7.02521	-11.1018	-26.8126	257.711
Guinea-Bissau	100	1200	1660870	1.21163	-10.1717	-26.1115	224.373
Israel	100	32800	7707042	-11.308	-6.26154	-25.6667	168.995
Australia	10.4111	43300	22262501	-4.25951	-14.5123	-25.3308	193.023
Iraq	58.0521	7200	31858481	-9.87247	-10.1296	-24.9951	179.958
Mexico	36.6045	15600	116220947	0.0226466	-7.70778	-24.628	263.128
Haiti	100	1300	9893934	0.75625	-5.625	-23.2625	297.319
Burkina Faso	100	1400	17812961	23.2953	-5.17135	-22.7827	156.243
Andorra	51.1828	37200	85293	7.31119	-4.69231	-22.3385	301.362
Sudan	100	2600	34847910	0.48334	0.697474	-22.1658	132.857
Chad	100	2000	11193452	-2.1583	-3.35198	-21.7743	129.499
Spain	82.085	31100	47370542	3.17314	-5.216	-21.287	248.892
Eritrea	100	800	6233682	8.35686	2.51139	-21.0399	165.978
Kuwait	100	40500	2695316	-1.34376	-9.21538	-20.7978	142.959
Tunisia	100	9900	10835873	-4.02411	-5.65	-19.8162	153.963
Swaziland	100	5900	1403362	-2.6973	-2.55824	-18.8978	329.122
Iran	91.0644	13300	79853900	1.62888	-8.40708	-17.9935	186.631
Tanzania	100	1600	48261942	3.72713	-5.28974	-17.9725	293.677
Uruguay	45.9153	16200	3324460	-1.58112	-13.6145	-17.0749	322.039
Uganda	100	1400	34758809	0.963677	-1.29299	-15.7622	329.091
Albania	88.3727	8200	3011405	0.541336	-1.06154	-14.1111	273.405
Argentina	22.9353	18400	42610981	-5.81535	-5.468	-13.4881	245.4
Mali	100	1100	15968882	6.10177	-1.23988	-12.7849	77.2047
Burundi	100	600	10888321	11.826	3.19359	-12.5872	321.885
Rwanda	100	1500	12012589	12.6576	3.28	-12.1308	324.897
Senegal	100	2100	13300410	10.9806	-4.59814	-12.0958	120.025
Pakistan	100	2900	193238868	1.014	-6.11177	-12.0246	150.216
Egypt	100	6700	85294388	-16.0339	-6.21791	-11.9096	59.7095
Libya	29.8583	12300	6002347	-8.30921	-1.02737	-11.8802	63.911
Ethiopia	100	1200	93877025	8.32293	-1.54907	-11.8301	283.129
Algeria	29.6078	7600	38087812	-1.42282	-0.165465	-11.8101	66.4949
Cyprus	66.1595	27500	1155403	3.13182	-3.85	-11.8045	176.258
Greece	65.818	24900	10772967	2.55615	-2.35482	-10.4726	194.031
Fiji	93.6048	4900	896758	-2.69737	-7.00263	-10.3368	94.9184
Turkmenistan	100	8900	5113040	-5.60604	-6.647	-10.3172	130.614
New Caledonia	23.9908	37700	264022	-3.12222	-2.2	-8.70556	90.6056
The Former Yugoslav Republic of Macedonia	49.0113	10800	2087171	7.22587	2.69145	-8.50342	272.837
Bahrain	1.4	29200	1281332	10.0133	-4.35769	-7.83846	47.2731
Bahamas	15.9722	31900	319031	1.72265	-4.81128	-7.45692	92.8804
Aruba	1.1	25300	109153	2.90289	3.75577	-7.16923	63.4026
Turkey	72.1159	15200	80694485	3.62983	-0.433081	-7.0375	255.056
United Arab Emirates	100	49800	5473972	-1.02456	-3.55673	-6.56051	40.5997
Qatar	100	103900	2042444	13.3987	1.09295	-5.89658	42.4671
Lesotho	100	2200	1936181	2.67156	0.726496	-5.79915	330.577
Kenya	100	1800	44037656	8.55009	-2.02066	-5.78648	271.51
Somalia	100	600	10251568	6.83067	-2.54582	-5.47154	221.866
Chile	65.6819	18700	17216945	2.57882	-1.54372	-4.94112	199.378
Kosovo	81.8996	3453	1847708	11.0183	6.92949	-4.77692	262.159
Gambia	100	1900	1883051	20.5928	-1.18462	-4.72308	134.023
Curacao	100	15000	146836	2.2256	-3.60214	-4.5141	118.471
Japan	100	36900	127253075	13.1116	7.05725	-4.49827	250.091
Mauritania	72.4865	2200	3437610	1.90426	0.479631	-4.17982	31.7302
Monaco	2.8	70700	30500	11.649	1.41538	-4.04615	278.669
Saudi Arabia	100	31800	26939583	-0.125022	1.27725	-3.59111	58.3626
Bulgaria	40.4819	14500	6981642	11.7855	3.29569	-3.312	250.65
Jamaica	53.4172	9300	2909714	0.0571429	-1.50714	-3.24286	204.136
Dominican Republic	42.9846	9800	10219630	-0.483333	-1.75556	-2.8	339.928
Belgium	100	38500	10444268	8.66529	1.57203	-2.74126	219.273
Puerto Rico	100	16300	3674209	0.2375	-1.2125	-2.725	270.413
Uzbekistan	100	3600	28661637	0.0381289	0.010788	-2.66932	163.57
Netherlands	100	42900	16805037	2.52058	1.01511	-2.40714	205.51
Jersey	6	57000	95732	-0.746154	0.657692	-2.28462	216.596
Afghanistan	100	1100	31108077	5.81293	-5.20686	-2.06405	182.174
Montenegro	20.2693	12000	653474	9.75534	8.03077	-1.7044	257.847
Niger	100	800	16899327	5.12186	1.97442	-1.65212	50.6094
France	67.8681	36100	65951611	9.54768	3.59759	-1.17432	244.91
Solomon Islands	100	3400	597248	-0.28913	-0.384783	-1.11304	13.4087
Luxembourg	50.9146	81100	514862	9.89073	3.02115	-1.07115	221.087
Guernsey	4.4	44600	65605	-1.24126	1.53846	-0.446154	214.223
British Virgin Islands	1.6	42300	31912	0	0	0	0
Cayman Islands	2.1	43800	53737	0	0	0	0
Faroe Islands	100	30500	49709	0	0	0	0
Mauritius	100	15800	1322238	0	0	0	0
Turks and Caicos Islands	34.2846	29100	47754	0	0	0	0
Vanuatu	93.1088	5000	261565	0	0	0	0
US Virgin Islands	2	14500	104737	0	0	0	0
Italy	89.2092	30600	61482297	5.17118	3.82649	0.153862	255.607
Azerbaijan	100	10700	9590159	5.38199	5.53094	0.16958	245.716
Western Sahara	67.567	2500	538811	5.30881	8.07998	0.204734	38.1068
Poland	81.8802	20900	38383809	9.90661	6.07354	1.89615	188.844
New Zealand	51.7214	30200	4365113	-1.97196	1.57296	3.10225	257.038
United Kingdom	100	37500	63395574	6.10692	3.91843	3.66138	164.99
Serbia	57.8735	10600	7243007	13.9318	10.019	3.86842	247.856
Germany	100	39700	81147265	9.93051	7.36703	4.12637	206.987
Ireland	50.6303	42600	4775982	5.53784	5.30978	4.35833	226.517
Yemen	100	2300	25408288	1.62334	3.82404	4.52577	94.7846
United States	34.6837	50700	316668567	6.95596	6.39665	5.05987	201.326
Slovakia	60.6905	24600	5488339	13.9756	11.6149	5.88103	216.869
Denmark	100	38300	5556452	8.47499	6.67826	6.21438	175.34
Nepal	100	1300	30430267	8.05405	6.30907	6.55055	292.94
Czech Republic	87.3179	27600	10162921	12.6773	11.4282	6.5707	215.87
Belarus	56.8681	15900	9625888	9.74007	7.0035	7.00962	176.899
Romania	75.7767	13000	21790479	14.1804	9.79444	7.11342	232.794
Bhutan	86.1041	6800	725296	15.218	9.27515	7.21361	301.534
Greenland	11.5366	37400	57714	2.54186	2.35887	7.48134	21.972
Falkland Islands	100	55400	3140	2.675	4.525	7.625	229.137
Hungary	54.6298	20000	9939470	15.5599	12.2423	8.01748	227.416
Armenia	100	5900	2974184	6.3428	7.63615	8.25923	255.715
Oman	89.881	29600	3154134	1.07051	7.83502	8.2625	66.4805
Latvia	80.421	18600	2178443	8.20906	8.35678	8.97839	173.45
Bosnia and Herzegovina	39.5919	8400	3875723	11.6863	11.7536	9.26308	259.296
Moldova	68.3398	3500	3619925	15.3306	10.4146	9.27	215.993
Ukraine	39.5627	7500	44573205	11.9563	9.70427	9.45867	199.829
Lithuania	67.7509	22000	3515858	10.4184	9.66113	9.70769	183.828
Isle of Man	3	53800	86159	6.1	6.25	9.75	217.05
Estonia	56.3768	22100	1266375	7.25962	7.57143	9.90989	166.584
Georgia	87.3478	6000	4555911	5.41292	8.78824	10.6964	255.424
Croatia	30.8583	18100	4475611	9.14305	10.6482	10.7373	267.187
Sweden	100	41900	9119423	3.20281	8.48286	11.5071	140.251
Kazakhstan	41.0999	14100	17736896	11.2794	9.36021	12.1535	165.391
North Korea	100	1800	24720407	12.196	11.938	12.6312	249.925
Norway	30.3933	55900	4722701	2.25106	7.9379	14.0183	90.9005
South Korea	100	32800	48955203	16.8089	16.8876	14.8138	256.235
San Marino	0.2	36200	32448	4.65	8.3	15.3	313.15
Finland	90.0435	37000	5266114	3.49599	10.2308	15.6219	136.122
Canada	12.3542	43400	34568211	4.06747	8.48795	16.4537	114.995
Switzerland	66.2241	46200	7996026	13.8946	14.9121	17.0462	229.781
China	100	9300	1349585838	13.7963	12.533	17.2062	210.847
Austria	82.0374	43100	8221646	15.3337	16.2218	17.2108	226.485
Russian Federation	16.5762	18000	142500482	8.92381	11.4946	17.77	125.553
Iceland	17.5928	39900	315281	5.63035	9.21895	17.8139	107.5
Slovenia	54.4054	28700	1992690	14.3654	15.0429	18.0209	250.588
Saint Pierre and Miquelon	23.8485	34900	5774	13.2161	7.56346	18.2827	133.863
Liechtenstein	100	89400	37009	14.3392	17.0923	19.1923	220.915
Mongolia	50.6254	5500	3226516	10.9595	11.5044	19.5021	161.013
Kyrgyzstan	100	2400	5548042	8.52958	12.2299	24.4505	213.032
Tajikistan	100	2300	7910041	13.3939	15.0404	29.7243	209.29
